# Supplementary material for: Effects of socioeconomic factors on cardiovascular-related symptoms among residents in Fukushima after the Great East Japan Earthquake: a cross-sectional study using data from the Fukushima Health Management Survey
Source: PubMed Central journal article supplement — BMJ Open. 2017 Jun 23;7(6):e014077. doi: 10.1136/bmjopen-2016-014077 (PMC5541377; doi:10.1136/bmjopen-2016-014077), 2017-06-23
Supplement: bmjopen-2016-014077.draft_revisions.pdf [file bmjopen-2016-014077.draft_revisions.pdf]

# BMJ Open

## Associations of socioeconomic factors after a disaster with cardiovascular related symptoms: the Fukushima Health Management Survey

|                                 |                                                                                                                                                                                                                                                                                                                                                                                                                                                                                                                                                                                                                                                                                                                                                                                                                                                                                                                                                                                                                                                                                                                                                                                                                                                                                                                                                                                                                                                                                                                                                                                                                                                                                                                                                                                                                           |
|---------------------------------|---------------------------------------------------------------------------------------------------------------------------------------------------------------------------------------------------------------------------------------------------------------------------------------------------------------------------------------------------------------------------------------------------------------------------------------------------------------------------------------------------------------------------------------------------------------------------------------------------------------------------------------------------------------------------------------------------------------------------------------------------------------------------------------------------------------------------------------------------------------------------------------------------------------------------------------------------------------------------------------------------------------------------------------------------------------------------------------------------------------------------------------------------------------------------------------------------------------------------------------------------------------------------------------------------------------------------------------------------------------------------------------------------------------------------------------------------------------------------------------------------------------------------------------------------------------------------------------------------------------------------------------------------------------------------------------------------------------------------------------------------------------------------------------------------------------------------|
| Journal:                        | <i>BMJ Open</i>                                                                                                                                                                                                                                                                                                                                                                                                                                                                                                                                                                                                                                                                                                                                                                                                                                                                                                                                                                                                                                                                                                                                                                                                                                                                                                                                                                                                                                                                                                                                                                                                                                                                                                                                                                                                           |
| Manuscript ID                   | bmjopen-2016-014077                                                                                                                                                                                                                                                                                                                                                                                                                                                                                                                                                                                                                                                                                                                                                                                                                                                                                                                                                                                                                                                                                                                                                                                                                                                                                                                                                                                                                                                                                                                                                                                                                                                                                                                                                                                                       |
| Article Type:                   | Research                                                                                                                                                                                                                                                                                                                                                                                                                                                                                                                                                                                                                                                                                                                                                                                                                                                                                                                                                                                                                                                                                                                                                                                                                                                                                                                                                                                                                                                                                                                                                                                                                                                                                                                                                                                                                  |
| Date Submitted by the Author:   | 02-Sep-2016                                                                                                                                                                                                                                                                                                                                                                                                                                                                                                                                                                                                                                                                                                                                                                                                                                                                                                                                                                                                                                                                                                                                                                                                                                                                                                                                                                                                                                                                                                                                                                                                                                                                                                                                                                                                               |
| Complete List of Authors:       | Zhang, Wen; Fukushima Medical University School of Medicine, Epidemiology<br>Ohira, Tetsuya; Fukushima Medical University, Radiation Medical Science Center for the Fukushima Health Management Survey; Fukushima Medical University School of Medicine, Epidemiology<br>Yasumura, Seiji; Fukushima Medical University<br>Maeda, Masaharu ; Fukushima Medical University, Radiation Medical Science Center for the Fukushima Health Management Survey; Fukushima Medical University School of Medicine, Disaster Psychiatry<br>Ohtsuru, Akira; Fukushima Medical University,<br>Harigane, Mayumi; Radiation Medical Science Center for the Fukushima Health Management Survey<br>Horikoshi, Naoko; Radiation Medical Science Center for the Fukushima Health Management Survey,<br>Suzuki, Yuriko; National Institute of Mental Health, National Center of Neurology and Psychiatry,<br>Yabe, Hirooki; Fukushima Medical University School of Medicine, Neuropsychiatry; Radiation Medical Science Center for the Fukushima Health Management Survey<br>Nagai, Masato<br>Nakano, Hironori ; Fukushima Medical University, Radiation Medical Science Center for the Fukushima Health Management Survey; Fukushima Medical University School of Medicine, Epidemiology<br>Hirosaki, Mayumi; Fukushima Medical University School of Medicine, Epidemiology<br>Uemura, Mayu; Fukushima Medical University School of Medicine, Epidemiology<br>Takahashi, Hideto; Fukushima Medical University School of Medicine, Information Management and Statistics Office; Fukushima Medical University School of Medicine, Radiation Medical Science Center for the Fukushima Health Management Survey<br>Kiyama, Kenji<br>Yamashita, Shunichi ; Nagasaki University School of Medicine<br>Abe, Masafumi; Fukushima Medical University, |
| <b>Primary Subject Heading</b>: | Epidemiology                                                                                                                                                                                                                                                                                                                                                                                                                                                                                                                                                                                                                                                                                                                                                                                                                                                                                                                                                                                                                                                                                                                                                                                                                                                                                                                                                                                                                                                                                                                                                                                                                                                                                                                                                                                                              |
| Secondary Subject Heading:      | Epidemiology, Sociology                                                                                                                                                                                                                                                                                                                                                                                                                                                                                                                                                                                                                                                                                                                                                                                                                                                                                                                                                                                                                                                                                                                                                                                                                                                                                                                                                                                                                                                                                                                                                                                                                                                                                                                                                                                                   |

1  
2  
3  
4  
5  
6  
7  
8  
9  
10  
11  
12  
13  
14  
15  
16  
17  
18  
19  
20  
21  
22  
23  
24  
25  
26  
27  
28  
29  
30  
31  
32  
33  
34  
35  
36  
37  
38  
39  
40  
41  
42  
43  
44  
45  
46  
47  
48  
49  
50  
51  
52  
53  
54  
55  
56  
57  
58  
59  
60

|           |                                                                                     |
|-----------|-------------------------------------------------------------------------------------|
| Keywords: | Great East Japan Earthquake, socioeconomic factors, cardiovascular related symptoms |
|           |                                                                                     |

SCHOLARONE™  
Manuscripts

For peer review only

1 **Associations of socioeconomic factors**  
2 **after a disaster with cardiovascular**  
3 **related symptoms: the Fukushima**  
4 **Health Management Survey**

5  
6 Wen Zhang<sup>1,2</sup>, Tetsuya Ohira<sup>1,2</sup>, Seiji Yasumura<sup>1,3</sup>, Masaharu Maeda<sup>1,4</sup>,  
7 Akira Otsuru<sup>1,5</sup>, Mayumi Harigane<sup>1</sup>, Naoko Horikoshi<sup>1</sup>, Yuriko Suzuki<sup>1,6</sup>,  
8 Hirooki Yabe<sup>1,7</sup>, Masato Nagai<sup>1,2</sup>, Hironori Nakano<sup>1,2</sup>, Mayumi Hirosaki<sup>2</sup>,  
9 Mayu Uemura<sup>2</sup>, Hideto Takahashi<sup>1</sup>, Kenji Kamiya<sup>1,8</sup>, Shunichi Yamashita<sup>1,9</sup>,  
10 Masafumi Abe<sup>1</sup>, for the Fukushima Health Management Survey Group

- 11  
12 1. Radiation Medical Science Center for the Fukushima Health Management  
13 Survey, Fukushima, Japan  
14 2. Department of Epidemiology, School of Medicine, Fukushima Medical  
15 University, Fukushima, Japan  
16 3. Department of Public Health, School of Medicine, Fukushima Medical  
17 University, Fukushima, Japan  
18 4. Department of Disaster Psychiatry, School of Medicine, Fukushima Medical  
19 University, Fukushima, Japan  
20 5. Department of Radiation Health Management, Fukushima Medical University,  
21 Fukushima, Japan  
22 6. National Institute of Mental Health, National Center of Neurology and  
23 Psychiatry, Tokyo, Japan

- 1  
2  
3  
4  
5  
6 24 7. Department of Neuropsychiatry, School of Medicine, Fukushima Medical  
7  
8 25 University, Fukushima, Japan  
9  
10 26 8. Department of Experimental Oncology, Research Institute for Radiation Biology  
11  
12 27 and Medicine, Hiroshima University, Hiroshima, Japan  
13  
14 28 9. Japan and Atomic Bomb Disease Institute, Nagasaki University, Nagasaki,  
15  
16 29 Japan  
17  
18  
19  
20  
21  
22  
23  
24  
25  
26  
27  
28  
29  
30  
31  
32

33 **Correspondence:**

34 Wen Zhang, PHD  
35 Department of Epidemiology, School of Medicine, Fukushima Medical University, 1  
36 Hikariga-oka, Fukushima City 960-1295, JAPAN  
37 Phone: +81-24-547-1343; Fax: +81-24-547-1336  
38 E-mail: [zhangw09@fmu.ac.jp](mailto:zhangw09@fmu.ac.jp)  
39  
40  
41  
42  
43  
44  
45  
46  
47  
48  
49  
50  
51  
52  
53  
54  
55  
56  
57  
58  
59  
60

1  
2  
3  
4  
5  
6  
7  
8  
9  
10  
11  
12  
13  
14  
15  
16  
17  
18  
19  
20  
21  
22  
23  
24  
25  
26  
27  
28  
29  
30  
31  
32  
33  
34  
35  
36  
37  
38  
39  
40  
41  
42  
43  
44  
45  
46  
47  
48  
49  
50  
51  
52  
53  
54  
55  
56  
57  
58  
59  
60

49 **Abstract**

50 **Objective:** To investigate the association between socioeconomic factors and the  
51 exacerbation of cardiovascular symptoms among evacuees after Great East Japan  
52 Earthquake.

53 **Methods:** A total of 73,433 subjects were included in the Fukushima Health  
54 Management survey. Exacerbation of headache, dizziness, palpitations, and shortness  
55 of breath were determined from self-report questionnaires. Socioeconomic factors  
56 included living arrangement, loss of employment and decreased income. Odds ratios  
57 (OR) and 95% confidence intervals (CI) of socioeconomic factors were estimated for  
58 each symptom using multiple logistic regression analyses.

59 **Results:** A total of 1,375 individuals reported exacerbation of headache, 881 of  
60 dizziness, 768 of palpitations, and 434 of shortness of breath. Evacuation  
61 accommodation was associated with all the above symptoms. Compared to participants  
62 living in their own home (OR=1.00), subjects living in relatives' homes had increased  
63 odds of experiencing exacerbation of headache (1.58; 95% CI 1.20–2.09) and dizziness  
64 (1.43; 95% CI 1.02–1.98); subjects living in temporary housing or apartments showed  
65 exacerbation of headache (1.55; 95% CI 1.32–1.81), dizziness (1.45; 95% CI 1.20–  
66 1.76), palpitations (1.25; 95% CI 1.03–1.51), and shortness of breath (1.75; 95% CI  
67 1.35–2.27); subjects living in evacuation shelters showed exacerbation of headache  
68 (1.80; 95% CI 1.10–2.97); and refugees living in temporary housing showed  
69 exacerbated headache (1.42; 95% CI 1.15–1.75), dizziness (1.39; 95% CI 1.08–1.78),  
70 and shortness of breath (1.50; 95% CI 1.07–2.09). Compared to the evacuees that  
71 retained their jobs, unemployed subjects showed increased odds for exacerbation of  
72 headache (1.28, 95% CI 1.12–1.46), dizziness (1.26, 95% CI 1.07–1.48), and

1  
2  
3  
4  
5  
6 73 palpitations (1.22, 95% CI 1.02–1.46). Decreased income was associated with  
7  
8 74 exacerbation of headache (1.39, 95% CI 1.21–1.60).

9  
10 75 **Conclusion:** After the earthquake, living in non-home conditions was more likely to  
11  
12 76 exacerbate cardiovascular symptoms among evacuees. Loss of employment was  
13  
14 77 another risk factor for exacerbated headache and dizziness.  
15

16  
17 78

18  
19 79

20  
21 80 **Keywords:** Great East Japan Earthquake, socioeconomic factors, cardiovascular related

22  
23 81 symptoms  
24

25  
26 82

27  
28 83

29  
30 84

31  
32 85

33  
34 86

35  
36 87

37  
38 88

39  
40 89

41  
42 90

43  
44 91

45  
46 92

47  
48 93

49  
50 94

51  
52 95

53  
54 96

55  
56  
57  
58  
59  
60

1  
2  
3  
4  
5  
6 97 **Strengths and limitations of this study**  
7

- 8 ● We examined the associations of socioeconomic factors after a disaster with  
9  
10 cardiovascular related symptoms among evacuees of the number of 73,433  
11  
12 subjects after the Great East Japan earthquake.  
13  
14 ● Our study is the first to identify an inverse relationship between low socioeconomic  
15  
16 status and exacerbated cardiovascular symptoms from an evacuee self-report after  
17  
18 a disaster.  
19  
20 ● A limitation of the present study was an overall response rate was low (40.7%) and  
21  
22 data may have contained sampling biases.  
23  
24 ● Another limitation of the present study should be that the information of changes in  
25  
26 family relationships (e.g., death, physical separation) among the evacuees after the  
27  
28 disaster has not been captured.  
29  
30 ● In addition, most questionnaires were collected in the same period (from Jan 2012  
31  
32 to Mar 2012).  
33  
34  
35  
36  
37  
38  
39  
40  
41  
42  
43  
44  
45  
46  
47  
48  
49  
50  
51  
52  
53  
54  
55  
56  
57  
58  
59  
60

1  
2  
3  
4  
5  
6 121 **Introduction**

7 122 The Great East Japan Earthquake and the subsequent Fukushima Daiichi nuclear  
8  
9 123 disaster, which occurred in March 2011, was the most destructive catastrophe in Japan  
10  
11 124 to date. Due to concerns over released radiation, most of the residents in nearby towns  
12  
13 125 were forced to evacuate and consequently suffered long-lasting anxiety. Shortly after  
14  
15 126 the disaster, a Fukushima Health Management Survey was conducted to investigate the  
16  
17 127 effects of long-term low-dose radiation exposure caused by the accident and to assess  
18  
19 128 the physical and mental wellbeing of evacuees. This survey included a basic survey,  
20  
21 129 which estimated individual radiation exposure of each resident, and four detailed  
22  
23 130 surveys comprising of a Comprehensive Health Check and thyroid ultrasonography, a  
24  
25 131 mental health and lifestyle survey, and a survey of pregnant women and nursing  
26  
27 132 mothers (1). The Mental Health and Lifestyle Survey used self-report questionnaires to  
28  
29 133 investigate health status and lifestyle of the refugees, including nutrition and diet,  
30  
31 134 perceived symptoms of illness, disaster-related experience, and socioeconomic  
32  
33 135 determinants.

34  
35  
36  
37  
38 136 Several previous studies have shown changes in the incidence of cardiovascular  
39  
40 137 events following disasters; however, results are conflicting (2-11). A recent study  
41  
42 138 reported a heterogeneous occurrence of cardiovascular events after the Great East  
43  
44 139 Japan Earthquake (2), while another study reported a significant increase in the  
45  
46 140 incidence of cardioembolic stroke after the earthquake (11). However, neither study  
47  
48 141 examined the incidence of perceived cardiovascular disease symptoms after a disaster,  
49  
50 142 nor did they focus on the effect of refugee socioeconomic status on health problems  
51  
52 143 during their evacuation term. However, considering these aspects is relevant for  
53  
54  
55  
56  
57  
58  
59  
60



1  
2  
3  
4  
5  
6 144 reviewing refugee health status, accessing the incidence of various diseases, and  
7  
8 145 providing health guidelines for refugees.  
9

10 146 Consequently, we conducted the present study to investigate the risk factors of  
11  
12 147 perceived cardiovascular symptoms following a major disaster. We hypothesized that a  
13  
14 148 decrease in socioeconomic status due to the earthquake would be associated with  
15  
16 149 exacerbated cardiovascular symptoms among evacuees.  
17  
18  
19

20 150

## 21 151 **Methods**

### 22 152 **Participants**

23  
24  
25 153 The primary purpose of the Fukushima Health Management Survey was to monitor  
26  
27 154 the long-term health and lifestyle of Fukushima residents and to provide them with  
28  
29 155 appropriate care (12). The Fukushima Health Management Survey consists of a basic  
30  
31 156 survey and four detailed surveys, namely, the thyroid ultrasound examination,  
32  
33 157 comprehensive health check, mental health and lifestyle survey, and pregnancy and  
34  
35 158 birth survey (for details of these surveys see (1)). The subjects of mental health and  
36  
37 159 lifestyle survey was included in the present study. Briefly, the target population, consists  
38  
39 160 of 210,189 officially registered victims of the Great East Japan Earthquake from the  
40  
41 161 evacuation zones Hirono Town, Naraha Town, Tomioka Town, Kawauchi Village,  
42  
43 162 Futaba Town, Namie Town, Katsurao Village, Minamisoma City, Tamura City,  
44  
45 163 Yamakiya District of Kawamata Town, and Iitate Village. In 2012, 180,604  
46  
47 164 questionnaires were sent out with 73,569 questionnaires returned with responses, i.e. a  
48  
49 165 response rate of 40.7%. Among the responders, 136 were excluded due to blank or  
50  
51 166 duplicated questionnaires and 9,245 for questionnaires filled in by a proxy. After  
52  
53  
54  
55  
56  
57  
58  
59  
60

1  
2  
3  
4  
5  
6 167 exclusion, the data of 73,433 subjects (32,301 men and 41,132 women) were used in  
7  
8 168 our analyses.

9  
10 169 The study protocol was approved by the Ethics Committee of Fukushima Medical  
11  
12 170 University. Participants who returned the self-administered questionnaires were  
13  
14 171 considered to have consented to participate.  
15

16  
17 172

### 18 173 **Data collection and measurement**

19  
20 174 A questionnaire was used to broadly investigate the health status and lifestyle of  
21  
22 175 the refugees. The exacerbation of headache, dizziness, palpitations, and shortness of  
23  
24 176 breath was determined based on self-reports in the questionnaire. All subjects were  
25  
26 177 asked to answer the question 'Do you have the following perceived symptoms after the  
27  
28 178 earthquake?' and could choose between the replies 'No', 'Yes', and 'Exacerbation'. In  
29  
30 179 the present study we focused on reports of 'exacerbation'.  
31  
32

33  
34 180 To evaluate Posttraumatic Stress Disorder (PTSD) symptoms we used the  
35  
36 181 non-military version of the Posttraumatic Stress Disorder Checklist (PCL-S) (12). This is  
37  
38 182 a 17-item self-report checklist based on the Diagnostic and Statistical Manual of Mental  
39  
40 183 Disorders (4th edition, DSM-IV) criteria (13), with each item rated using a Likert-type  
41  
42 184 scale from one ('not at all') to five ('extremely'). Respondents were requested to  
43  
44 185 respond to questions about each PTSD symptom separately and report whether they  
45  
46 186 had experienced a given symptom during the past month. Based on summing the  
47  
48 187 scores from each of the 17 items, a total PCL-S score can range from 17 to 85 (12).  
49  
50

51 188 In addition to the PCL-S checklist, the following items were included in the  
52  
53 189 self-assessment and self-report questionnaires:

54  
55  
56 190 1. Demographic characteristics  
57  
58  
59  
60

1  
2  
3  
4  
5  
6 191 Demographic subject characteristics include gender, age group, mental health  
7  
8 192 status, history of mental illness, incidence of PTSD symptoms, smoking and drinking  
9  
10 193 habits, and current physical activity levels. Age groups were divided into childbearing  
11  
12 194 age (20–49 years), middle age (50–64 years), and old age (65 years and above).

13  
14 195 Mental health status, and specifically incidence and severity of depression, was  
15  
16 196 measured by the Japanese version of the K6 Kessler Psychological Distress Scale,  
17  
18 197 which has been validated by previous studies (14, 15). In the K6 assessment,  
19  
20 198 participants were asked if they had experienced any of the following six symptoms  
21  
22 199 during the past 30 days: feeling so depressed that nothing could cheer them up, feeling  
23  
24 200 that everything was an effort, or feeling nervous, hopeless, restless, fidgety, or  
25  
26 201 worthless. Each question was rated on a 5-point Likert-type scale from zero (none of the  
27  
28 202 time) to four (all of the time), with higher scores signifying worse mental health status  
29  
30 203 (total range: 0–24) (12). In addition, we assessed participant's history of mental illness  
31  
32 204 by self-report as 'yes' or 'no'.  
33

34  
35  
36 205 We obtained data on smoking and drinking habits using the following metrics,  
37  
38 206 respectively: 'non-smoker', 'ex-smoker', or 'current smoker'; and 'once or more per  
39  
40 207 month', 'less than once per month', or 'ex- drinker'. Participants had four options to  
41  
42 208 assess current physical activity level: 'every day', '2-4 times/week', 'once a week', or  
43  
44 209 'nearly none'.  
45

## 46 210 2. Socioeconomic variables

47  
48  
49 211 Participants were required to select from six options regarding their living  
50  
51 212 arrangements: evacuation shelter, temporary housing, rental housing or apartment, a  
52  
53 213 relative's home, their own home, and other. For analysis, evacuation shelters and  
54  
55  
56  
57  
58  
59  
60

1  
2  
3  
4  
5  
6 214 temporary housing were combined due to their similarity, and the last option was  
7  
8 215 considered non-informative due to its ambiguity and thus excluded from analysis.  
9  
10 216 Other socioeconomic variables included change in employment status and change in  
11  
12 217 income. By answering 'Yes' to either question, the participant indicated he/she became  
13  
14 218 unemployed or experienced decreased income since the disaster.

### 16 219 3. Disaster-related variables

18 220 Disaster-related variables included experience of the tsunami (yes or no), experience  
19  
20 221 of the nuclear power plant accident (defined as hearing the explosion; yes or no), losing  
21  
22 222 someone close because of the disaster (yes or no), and damage to accommodation (no,  
23  
24 223 partial damage, half of accommodation destroyed, more than a half destroyed, total  
25  
26 224 destruction).

27  
28  
29  
30 225

### 31 226 **Statistical analysis**

32  
33  
34 227 The incidence of exacerbation of headache, dizziness, palpitations, and shortness of  
35  
36 228 breath was compared between subjects with different demographic, socioeconomic,  
37  
38 229 and disaster-related characteristics using chi-square tests. For the analyses  
39  
40 230 investigating PTSD incidence, a PCL-S cut-off score of 50 was used, according to  
41  
42 231 Weathers et al (16). Subjects who received a PCL-S of 50 or greater were allocated to  
43  
44 232 the 'high-scoring group' and compared to the low-scoring (PCL-S < 50) group using  
45  
46 233 chi-square tests.

47  
48  
49 234 Odds ratios (ORs) and 95% confidence intervals (CIs) of each socioeconomic  
50  
51 235 determinant (living arrangement, unemployment, and decreased income) were  
52  
53 236 estimated by applying multiple logistic regression models. Adjustment variables  
54  
55 237 consisted of sex (male, female), age (20–49, 50–64, ≥65 years), drinking status (once or  
56  
57  
58  
59  
60

1  
2  
3  
4  
5  
6 238 more per month, ex-drinker, less than once per month), smoking status  
7  
8 239 (non-smoker, ex-smoker, current smoker), mental health distress (K6<3, K6>=13),  
9  
10 240 hypertension history (yes or no), stroke history (yes or no), heart disease history (yes or  
11  
12 241 no), physical activities (>= once per day, 2–4 times per week, once per week, never),  
13  
14 242 tsunami experience (yes or no), radiation experience (yes or no), damage of  
15  
16 243 accommodation (no, partial, half, more than a half, total), loss of family member (yes or  
17  
18 244 no).

19  
20  
21 245 We conducted the above analyses both for separate and combined sexes. All  
22  
23 246 analyses were conducted using SAS software version 9.4 (SAS Institute Inc., Cary, NC,  
24  
25 247 USA).

26  
27 248

## 28 29 249 **Results**

30  
31  
32 250 As shown in the tables, 1,893 individuals reported exacerbation of headaches, 1,229  
33  
34 251 of dizziness, 626 of palpitations, and 434 exacerbation of shortness of breath.

## 35 36 252 **Demographic characteristics**

37  
38 253 Table 1 summarizes the demographic characteristics of the subjects. Exacerbation of  
39  
40 254 the above cardiovascular symptoms was significantly more likely to happen in women  
41  
42 255 than in men (3.5% vs. 1.4% for headaches; 2.2% vs. 1.1% for dizziness; 2.0% vs. 0.9%  
43  
44 256 for palpitations; 0.9% vs. 0.8% for shortness of breath). Subjects experiencing  
45  
46 257 exacerbation of headaches, dizziness, or palpitations were more likely to be young (20–  
47  
48 258 49 years), while those experiencing exacerbation of shortness of breath were more  
49  
50 259 likely to be old (>=65 years). Subjects experiencing exacerbation of cardiovascular  
51  
52 260 symptoms were also more likely to suffer from depression (K6>=13) and Posttraumatic  
53  
54 261 Stress Disorder (PCL>=50), and to commonly have a history of hypertension, stroke, or

1  
2  
3  
4  
5  
6 262 heart disease. Non-smokers and non-drinkers were no less likely than (ex-) smokers or  
7  
8 263 (ex-) drinkers to experience exacerbation of cardiovascular symptoms. However,  
9  
10 264 symptom exacerbation was most pronounced in subjects who were physically active  
11  
12 265 less than once a day.

### 14 266 **Socioeconomic variables**

16  
17 267 Table 1 also shows refugees living in their own or a relative's home are less likely to  
18  
19 268 experience exacerbated cardiovascular symptoms. Of the refugees living in their own  
20  
21 269 home, 1.4% reported exacerbation of headache, 0.9% of dizziness, 1.6% of palpitations  
22  
23 270 and 1.0% of shortness of breath. The corresponding statistics for refugees living in  
24  
25 271 temporary housing and rental houses/apartments were 2.8%, 1.9%, 1.3%, and 1.2%  
26  
27 272 and 3.5%, 2.1%, 1.8%, and 1.0%, respectively.

29  
30 273 In the group that became unemployed due to the disaster, 4.2% subjects reported  
31  
32 274 the exacerbation of headache, 2.5% of dizziness, 2.1% of palpitations and 1.1% of  
33  
34 275 shortness of breath, while the corresponding statistics for the group that did not lose  
35  
36 276 their jobs after the disaster were 2.2%, 1.5%, 1.3%, and 0.8%. In addition, exacerbation  
37  
38 277 of most cardiovascular symptoms was higher in subjects whose income decreased due  
39  
40 278 to the disaster compared to those who maintained income levels (3.6% vs. 2.4% for  
41  
42 279 exacerbation of headache, 2.0% vs. 1.6% for exacerbation of dizziness, and 1.7% vs.  
43  
44 280 1.4% for exacerbation of palpitation).

### 47 281 **Disaster-related variables**

49  
50 282 Subjects that directly experienced the tsunami and the nuclear power plant accident  
51  
52 283 were more likely to experience exacerbated cardiovascular symptoms. Among those  
53  
54 284 experiencing the tsunami, 3.2% reported exacerbation of headache, 2.2% of dizziness,  
55  
56 285 1.7% of palpitations, and 1.7% of shortness of breath, compared to 2.4%, 1.6%, 1.5%,  
57  
58  
59  
60

1  
2  
3  
4  
5  
6 286 and 0.8%, respectively, of subjects with no experience of the tsunami. The  
7  
8 287 corresponding statistics for subjects that had heard the nuclear power plant accident  
9  
10 288 were 3.1%, 2.1%, 1.9%, and 1.1% compared to 2.1%, 1.2%, 1.0%, and 0.6%, that had  
11  
12 289 not.

### 290 **Multiple Logistic Regression analyses**

16  
17 291 Table 3 summarizes the odds ratios (ORs) and 95% CIs of each socioeconomic  
18  
19 292 determinant for exacerbation of headache, dizziness, palpitations, and shortness of  
20  
21 293 breath. Living arrangement emerged as a risk factor for exacerbated cardiovascular  
22  
23 294 symptoms from our models, which were adjusted for multiple demographic-, health-,  
24  
25 295 and disaster-related variables. Compared to participants living in their own home (OR =  
26  
27 296 1), those living in relatives' homes had higher odds to experience exacerbation of  
28  
29 297 headache (1.58; 95% CI 1.20–2.09) and dizziness (1.43; 95% CI 1.02–1.98). Similarly,  
30  
31 298 subjects living in temporary housing or apartments had higher odds of exacerbated  
32  
33 299 headache (1.55; 95% CI 1.32–1.81), dizziness (1.45; 95% CI 1.20–1.76), palpitations  
34  
35 300 (1.25; 95% CI 1.03–1.51), and shortness of breath (1.75; 95% CI 1.35–2.27).  
36  
37 301 Participants living in evacuation shelters had increased odds of exacerbation of  
38  
39 302 headache (1.80; 95% CI 1.10–2.97) and refugees living in temporary housing similarly  
40  
41 303 had increased odds of exacerbation of headache (1.42; 95% CI 1.15–1.75), dizziness  
42  
43 304 (1.39; 95% CI 1.08–1.78), and shortness of breath (1.50; 95% CI 1.07–2.09).

44  
45 305 Loss of employment also emerged as a risk factor for increased odds of  
46  
47 306 cardiovascular symptoms. Compared to the evacuees that remained employed (OR =  
48  
49 307 1), subjects that had become unemployed were at higher risk of experiencing  
50  
51 308 exacerbation of headache (1.28; 95% CI 1.12–1.46), dizziness (1.26; 95% CI 1.07–  
52  
53 309 1.48), and palpitation (1.22; 95% 1.02–1.46). In an unadjusted model, we found a  
54  
55  
56  
57  
58  
59  
60

1  
2  
3  
4  
5  
6 310 significant positive association between unemployment and exacerbation of  
7  
8 311 palpitations; however, after adjusting for multiple relevant variables, this association  
9  
10 312 became non-significant.

11  
12 313 There was no association between decreased income and exacerbated  
13  
14 314 cardiovascular symptoms, except for headache. Here, adjusting for multiple variables  
15  
16 315 resulted in an increased odds ratio for exacerbation of headaches both in an analysis  
17  
18 316 combining both sexes (1.39, 95% CI 1.21–1.60) and in separate analyses of men and  
19  
20  
21 317 women.

22  
23 318

## 24 25 319 **Discussion**

26  
27 320 We have demonstrated a decrease in socioeconomic status due to the earthquake  
28  
29 321 was associated with exacerbated cardiovascular symptoms among evacuees of the  
30  
31 322 Great East Japan Earthquake. Compared with participants living in their own home,  
32  
33 323 people of both genders living in relatives' homes, evacuation shelters, temporary  
34  
35 324 housing, or rental houses or apartments were more likely to experience exacerbated  
36  
37 325 headache, dizziness, palpitations, or shortness of breath. Similarly, loss of employment  
38  
39 326 and reduced income due to the disaster increased the risk of exacerbated symptoms.

40  
41  
42 327 The following three points should be considered in the context of our results. Firstly,  
43  
44 328 earthquakes are definitely associated with increased cardiovascular disease, including  
45  
46 329 sudden cardiac death and acute myocardial infarction (2-11), which provides some  
47  
48 330 support for the present study. The Athens earthquake, the Newcastle earthquake of  
49  
50 331 Australia, and the Northridge Earthquake (NEQ) of Los Angeles were all associated with  
51  
52 332 increased deaths due to cardiovascular disease (4), though this increase was limited to  
53  
54 333 only a few days post-disaster (4). Increased cardiovascular disease subsequent to the  
55  
56  
57  
58  
59  
60



1  
2  
3  
4  
5  
6 334 Hanshin-Awaji earthquake persisted for more than a month. In addition, an increase in  
7  
8 335 the number of subjects with acute myocardial infarction, especially in women, was  
9  
10 336 particularly evident during the first 4 weeks post-disaster (10). After the Great East  
11  
12 337 Japan Earthquake, the incidence of reported cardioembolic stroke increased in the first  
13  
14 338 3–9 months following the disaster (11), as did the incidence of heart failure and other  
15  
16 339 cardiovascular diseases (6). Our study contributes to the reported incidences of  
17  
18 340 cardiovascular disease by demonstrating exacerbated cardiovascular symptoms among  
19  
20 341 evacuees after a disaster from self-report questionnaires rather than from death  
21  
22 342 certificates.

23  
24  
25 343 Secondly, increases in cardiovascular events and exacerbated cardiovascular  
26  
27 344 symptoms can be attributed to post-disaster distress or mental problems. A review  
28  
29 345 suggests that extremely stressful experiences, such as earthquakes, can trigger  
30  
31 346 cardiovascular events (17-19). Acute major stress and chronic stress, i.e. the  
32  
33 347 cumulative load of minor daily stress, can have both long-term consequences, which  
34  
35 348 can be perceived as stressful and a potential threat to one's environment, subsequently  
36  
37 349 inducing a variety of negative emotional responses, such as fear, anxiety, sadness,  
38  
39 350 anger, hostility, and depression (5,20) leading to hypertension or cardiovascular events  
40  
41 351 (17-19). In the current study, all subjects exhibiting exacerbated cardiovascular  
42  
43 352 symptoms were more likely to have depression ( $K6 \geq 13$ ) or Posttraumatic Stress  
44  
45 353 Disorder ( $PCL \geq 50$ ). Logistic regression analyses also showed that depression and  
46  
47 354 Posttraumatic Stress Disorder were both independently associated with exacerbated  
48  
49 355 cardiovascular symptoms (data not shown).

50  
51  
52  
53 356 Thirdly, although post-disaster increases in cardiovascular events were widely  
54  
55 357 reported in previous studies, the investigation of socioeconomic determinants of these

1  
2  
3  
4  
5  
6 358 events during the evacuation term of refugees was very limited. Previous studies  
7  
8 359 reported that one year after the Wenchuan Earthquake in China, depression severity  
9  
10 360 among refugees varied with income, housing status, and social support (21), indicating  
11  
12 361 that earthquake impact on income was indirectly associated with life satisfaction and  
13  
14 362 depression via its effect on financial status (22). Another study showed that six months  
15  
16 363 after the 2011 Christchurch earthquake in New Zealand, on average lower income per  
17  
18 364 home contributed unequivocally to earthquake-related distress and dysfunction (23).

19  
20  
21 365 In the present study, not living in the own home but living in evacuation shelters or  
22  
23 366 temporary housing, was associated with exacerbation of all examined cardiovascular  
24  
25 367 symptoms, which was more robust in women than in men. Evacuation shelters and  
26  
27 368 temporary housing were less spacious, damper, and less comfortable than the refugees'  
28  
29 369 homes. Due to insufficient access to supermarkets or shortages of cooking equipment  
30  
31 370 and utilities, such as gas, evacuees living in shelters would struggle to access balanced  
32  
33 371 meals. A recent cross-sectional study showed a well-balanced diet was associated with  
34  
35 372 better living conditions among refugees after the Great East Japan Earthquake,  
36  
37 373 whereas imbalanced diets, particularly with regard to meat content, were not (24). In  
38  
39 374 addition, having to take refuge in accommodation other than the own home meant that  
40  
41 375 the own neighborhood had been damaged by the disaster, which may lead to shortness  
42  
43 376 of social support. In addition, among the refugees. All of the above factors can be  
44  
45 377 considered predictors of stress among refugees, where women may be more likely to  
46  
47 378 be influenced than men.

48  
49  
50  
51 379 Unemployment and decreased income due to the disaster were also associated with  
52  
53 380 exacerbation of some cardiovascular symptoms. These results were expected as poor  
54  
55 381 economic circumstances are expected to exacerbate depression. Low income may be  
56  
57  
58  
59  
60

1  
2  
3  
4  
5  
6 382 considered a chronic stressor, increasing psychological distress as a result of limited  
7  
8 383 resource access and opportunities for resource accumulation (23). Previous studies  
9  
10 384 also showed that, following an earthquake, living in a low-income area may contribute to  
11  
12 385 greater psychological distress due to lack of occupational, social, and financial  
13  
14 386 resources. A community study showed that, after the Christchurch earthquake, low  
15  
16 387 household income contributed strongly to earthquake-related distress (23). In the  
17  
18 388 present study, we found a significant association between disaster-related  
19  
20 389 unemployment and exacerbation of some cardiovascular symptoms, but the  
21  
22 390 subsistence allowance provided to refugees by the Japanese government may have  
23  
24 391 reduced effect size by reducing the impact of lowered economic circumstances on  
25  
26 392 refugees.

27  
28  
29 393 Our understanding of disaster-related stress on cardiovascular disease remains  
30  
31 394 incomplete. A clinical study on the 1995 Hanshin-Awaji earthquake comparing pre- and  
32  
33 395 post- BP levels in well-controlled hypertension patients showed an increase of 18mmHg  
34  
35 396 in diastolic blood pressure two weeks after the earthquake (25). Although white-coat  
36  
37 397 hypertension contributed partly to the results, whereby patients exhibit increased blood  
38  
39 398 pressure in clinical settings, some patients developed sustained hypertension that  
40  
41 399 persisted for one year after the earthquake (25). One study found increased levels of  
42  
43 400 cholesterol and triglycerides a few weeks after an earthquake (3), whereas other studies  
44  
45 401 failed to show significantly higher total cholesterol or HDL-cholesterol during the first two  
46  
47 402 weeks after the Hanshin-Awaji earthquake (7). Therefore, the extent to which changes  
48  
49 403 in blood lipid profile contributes to exacerbated cardiovascular symptoms several  
50  
51 404 months after the Great East Japan Earthquake remains undetermined. Chronic  
52  
53 405 psychological stress is also associated with increased insulin resistance (5). A recent  
54  
55  
56  
57  
58  
59  
60

1  
2  
3  
4  
5  
6 406 study after the Great East Japan Earthquake found the negative effects of the disaster  
7  
8 407 on metabolic factors were greater among evacuees than non-evacuees (26), which may  
9  
10 408 contribute to exacerbated cardiovascular symptoms among evacuees.

11  
12 409 The large scale of assessment and assessment under post-disaster  
13  
14 410 conditions provide considerable authority for the present study. In addition, our study is  
15  
16 411 the first to identify an inverse relationship between low socioeconomic status  
17  
18 412 and exacerbated cardiovascular symptoms from an evacuee self-report after a disaster;  
19  
20 413 our results will be useful for generating guidelines for evacuee health. However, the  
21  
22 414 following study limitations should be considered: Firstly, the overall response rate was  
23  
24 415 low (40.7%) and data may have contained sampling biases. Secondly, under the  
25  
26 416 extraordinary and unusual social circumstances that follow a major disaster, health  
27  
28 417 symptoms perceived by evacuees may be strongly influenced by changes in family  
29  
30 418 relationships (e.g., death, physical separation) among the evacuees. However, the  
31  
32 419 present study did not capture this information. The potential associations observed in  
33  
34 420 this study will be investigated over an extended period. Thirdly, although most  
35  
36 421 questionnaires were collected in the same period (from Jan 2012 to Mar 2012), it is  
37  
38 422 possible the timing of the survey affected the perceived cardiovascular symptoms.  
39  
40  
41  
42

423 In conclusion, the present study was the first to identify a relationship between lower  
44  
45 424 socioeconomic status due to the earthquake with exacerbated cardiovascular  
46  
47 425 symptoms among evacuees after the Great East Japan Earthquake. Our findings will  
48  
49 426 inform future periodic health examinations and health guidelines for evacuees.  
50

51 427

52 428

53  
54  
55  
56 429 **Acknowledgements**

1  
2  
3  
4  
5  
6 430 This Survey was conducted as part of Fukushima Prefecture's post-disaster recovery  
7  
8 431 plans and supported by the national 'Health Fund for Children and Adults Affected by the  
9  
10 432 Nuclear Incident.'

11  
12 433

13  
14 434 **Contributors**

15  
16 435 WZ and TO designed the study. TO, SY, MM, MH, NH, YS, HY, MH, HT and AO were  
17  
18 436 responsible for the data collection and overseeing study procedures. The analyses was  
19  
20 437 conducted by WZ and TO. The manuscript was made by WZ. All the authors did contribution  
21  
22 438 to the revision of the manuscript. All the authors read and approved the final version of the  
23  
24 439 manuscript.

25  
26  
27 440

28  
29 441 **Declaration of interests**

30  
31 442 We declare that we have no competing interests.

32  
33  
34 443

35  
36 444 **Patient consent**

37  
38 445 Obtained.

39  
40  
41 446

42  
43 447 **Data sharing statement**

44  
45 448 No additional data are available.

46  
47 449

48  
49 450

50  
51 451

52  
53 452

54  
55 453 **References**

- 1  
2  
3  
4  
5  
6 454 1. Yasumura S, Hosoya M, Yamashita S, Kamiya K, Abe M, Akashi M, Kodama K,  
7  
8 455 Ozasa K; Fukushima Health Management Survey Group. Study protocol for the  
9  
10 456 Fukushima Health Management Survey. *J Epidemiol.* 2012; 22: 375-383.  
11  
12
- 13 457 2. Nozaki E, Nakamura A, Abe A, Kagaya Y, Kohzu K, Sato K, Nakajima S, Fukui S,  
14  
15 458 Endo H, Takahashi T, Seki H, Tamaki K, Mochizuki I. Occurrence of cardiovascular  
16  
17 459 events after 2011 Great East Japan Earthquake and tsunami disaster. *Int Heart J.*  
18  
19 460 2013; 54: 247-253.  
20  
21
- 22  
23 461 3. Trevisan M, Celentano E, Meucci C, Farinaro E, Jossa F, Krogh V, Giumetti D,  
24  
25 462 Panico S, Scottoni A, Mancini M. Short-term effect of natural disasters on coronary  
26  
27 463 heart disease risk factors. *Arteriosclerosis.* 1986; 6: 491-494.  
28  
29
- 30 464 4. Kloner RA, Leor J, Poole WK, Perritt R. Population-based analysis of the effect of the  
31  
32 465 Northridge Earthquake on cardiac death in Los Angeles County, California. *J Am*  
33  
34 466 *Coll Cardiol.* 1997; 30:1174-1180.  
35  
36
- 37 467 5. Kario K, McEwen BS, Pickering TG. Disasters and the heart: a review of the effects of  
38  
39 468 earthquake-induced stress on cardiovascular disease. *Hypertens Res.* 2003;  
40  
41 469 26:355-367.  
42  
43
- 44 470 6. Kario K, Matsuo T, Kayaba K, Soukejima S, Kagamimori S, Shimada K.  
45  
46 471 Earthquake-induced cardiovascular disease and related risk factors in focusing on  
47  
48 472 the Great Hanshin-Awaji Earthquake. *J Epidemiol.* 1998; 8:131-139.  
49
- 50  
51 473 7. Kario K, Matsuo T. Increased incidence of cardiovascular attacks in the epicenter just  
52  
53 474 after the Hanshin-Awaji earthquake. *Thromb Haemost.* 1995; 74: 1207.  
54  
55  
56  
57  
58  
59  
60

- 1  
2  
3  
4  
5  
6 475 8. Kario K, Matsuo T, Kobayashi H, Yamamoto K, Shimada K. Earthquake-induced  
7  
8 476 potentiation of acute risk factors in hypertensive elderly patients: possible triggering  
9  
10 477 of cardiovascular events after a major earthquake. *J Am Coll Cardiol.* 1997; 29:  
11  
12 478 926-933.
- 14 479 9. Kario K, Matsuo T, Shimada K, Pickering TG. Factors associated with the occurrence  
15  
16 480 and magnitude of earthquake-induced increases in blood pressure. *Am J Med.*  
17  
18 481 2001; 111: 379-384.
- 21 482 10. Suzuki S, Sakamoto S, Miki T, Matsuo T. Hanshin-Awaji earthquake and acute  
22  
23 483 myocardial infarction [letter]. *Lancet.* 1995; 345: 981.
- 26 484 11. Itabashi R, Furui E, Sato S, Yazawa Y, Kawata K, Mori E. Incidence of  
27  
28 485 cardioembolic stroke including paradoxical brain embolism in patients with acute  
29  
30 486 ischemic stroke before and after the Great East Japan Earthquake. 2014;  
31  
32 487 37:431-437.
- 35 488 12. Yabe H, Suzuki Y, Mashiko H, Nakayama Y, Hisata M, Niwa S, Yasumura S,  
36  
37 489 Yamashita S, Kamiya K, Abe M. Psychological distress after the great East Japan  
38  
39 490 earthquake and fukushima daiichi nuclear power plant accident: results of a mental  
40  
41 491 health and lifestyle survey through the fukushima health management survey in  
42  
43 492 fy2011 and fy2012. *Fukushima J Med Sci.* 2014; 60:57-67.
- 46 493 13. Blanchard EB, Jones-Alexander J, Buckley TC, Forneris CA. Psychometric  
47  
48 494 properties of the PTSD Checklist (PCL). *Behav Res Ther.* 1996; 34: 669-673.
- 51  
52  
53  
54  
55  
56  
57  
58  
59  
60

- 1  
2  
3  
4  
5  
6 496 14. Furukawa TA, Kessler RC, Slade T, Andrews G. The performance of the K6 and  
7  
8 497 K10 screening scales for psychological distress in the Australian National Survey of  
9  
10 498 Mental Health and Well-Being. *Psychol Med.* 2003; 33:357-362.  
11  
12  
13 499 15. Sakurai K, Nishi A, Kondo K, Yanagida K, Kawakami N. Screening performance of  
14  
15 500 K6/K10 and other screening instruments for mood and anxiety disorders in Japan.  
16  
17 501 *Psychiatry Clin Neurosci.* 2011; 65:434-441.  
18  
19  
20 502 16. Weathers FW, Litz BT, Herman DS, Huska JA, Keane TM. The PTSD checklist  
21  
22 503 (OCL): Reliability, Validity, and Diagnostic Utility. Paper presented at the Annual  
23  
24 504 Meeting of the International Society for Traumatic Stress Studies, San Antonio, TX.  
25  
26 505 1993.  
27  
28  
29 506 17. Pickering TG. Mental stress as a causal factor in the development of hypertension  
30  
31 507 and cardiovascular disease. *Curr Hypertens Rep.* 2001; 3: 249-254.  
32  
33  
34 508 18. Kabutoya T, Kario K. Earthquake and blood pressure. *Hypertens Res.* 2009;  
35  
36 509 32:732-734.  
37  
38  
39 510 19. Kario K. Disaster hypertension- its characteristics, mechanism, and management.  
40  
41 511 *Circ J.* 2012; 76: 553-552.  
42  
43 512 20. Yokoyama Y, Otsuka K, Kawakami N, Kobayashi S, Ogawa A, Tannno K, Onoda T,  
44  
45 513 Yaegashi Y, Sakata K. Mental health and related factors after the Great East Japan  
46  
47 514 earthquake and tsunami. *PLoS One.* 2014; 9: e102497.  
48  
49  
50 515 21. Xu J, Mo L, Xu Z. A cross-sectional study on risk factors of depression severity  
51  
52 516 among survivors of the 2008 Sichuan earthquake. *Community Ment Health J.* 2013;  
53  
54 517 49: 847-856.  
55  
56  
57  
58  
59  
60



- 1  
2  
3  
4  
5  
6 518 22. Huang Y, Wong H, Tan HT. Associations between economic loss, financial strain  
7  
8 519 and the psychological status of Wenchuan earthquake survivors. *Disasters*. 2015;  
9  
10 520 39:795-810.
- 11  
12 521 23. Dorahy MJ, Rowlands A, Renouf C, Hanna D, Britt E, Carter JD. Impact of average  
13  
14 522 household income and damage exposure on post-earthquake distress and  
15  
16 523 functioning: A community study following the February 2011 Christchurch  
17  
18 524 earthquake. *Br J Psychol*. 2015; 106: 526-543.
- 19  
20  
21 525 24. Nishi N, Yoshimura E, Ishikawa-Takata K, Tsuboyama-Kasaoka N, Kubota T,  
22  
23 526 Miyachi M, Tokudome S, Yokoyama Y, Sakata K, Kobayashi S, Ogawa A.  
24  
25 527 Relationship of living conditions with dietary patterns among survivors of the great  
26  
27 528 East Japan earthquake. *J Epidemiol*. 2013; 5: 376-381.
- 28  
29  
30 529 25. Kario K, Matsuo T, Ishida T, Shimada K. 'White coat' hypertension and the  
31  
32 530 Hanshin-Awaji Earthquake. *Lancet*. 1995; 345: 1346.
- 33  
34  
35 531 26. Satoh H, Ohira T, Hosoya M, Sakai A, Watanabe T, Ohtsuru A et al. Evacuation  
36  
37 532 after the Fukushima Daiichi Nuclear Power Plant Accident Is a Cause of Diabetes:  
38  
39 533 Results from the Fukushima Health Management Survey. *J Diabetes Res*. 2015.  
40  
41  
42 534  
43  
44 535  
45  
46 536  
47  
48 537  
49  
50 538  
51  
52 539  
53  
54 540  
55  
56  
57  
58  
59  
60

1  
2  
3  
4  
5  
6  
7  
8  
9  
10  
11  
12  
13  
14  
15  
16  
17  
18  
19  
20  
21  
22  
23  
24  
25  
26  
27  
28  
29  
30  
31  
32  
33  
34  
35  
36  
37  
38  
39  
40  
41  
42  
43  
44  
45  
46  
47  
48  
49  
50  
51  
52  
53  
54  
55  
56  
57  
58  
59  
60

541 Table 1. Characteristics of survey participants and correlated incidence of exacerbation of  
542 the Post Traumatic Stress Disorder syndromes headache (first table), dizziness (second  
543 table), palpitations (third table), and shortness of breath (fourth table). P values indicate  
544 outcomes of Chi-square tests of participants with PCL-S  $\geq 50$ .

For peer review only

|                                       | No            | Yes           | Exacerbation of headache | P      |
|---------------------------------------|---------------|---------------|--------------------------|--------|
| <b>Sex</b>                            | No. (%)       | No. (%)       | No. (%)                  |        |
| Men                                   | 28,553 (88.4) | 3,282 (10.2)  | 466 (1.4)                | <0.001 |
| Women                                 | 31,408 (76.4) | 8,297 (20.2)  | 1,427 (3.5)              |        |
| <b>Age</b>                            |               |               |                          |        |
| 15-49                                 | 18,998 (75.9) | 5,063 (20.2)  | 966 (3.9)                | <0.001 |
| 50-64                                 | 17,470 (81.9) | 3,356 (15.7)  | 514 (2.4)                |        |
| >=65                                  | 23,493 (86.8) | 3,160 (11.7)  | 413 (1.5)                |        |
| <b>Mental Health Status</b>           |               |               |                          |        |
| K6<13                                 | 53,897 (85.1) | 8,370 (13.2)  | 1,092 (1.7)              | <0.001 |
| K6>=13                                | 6,064 (60.2)  | 3,209 (31.9)  | 801 (8.9)                |        |
| <b>Post Traumatic Stress Disorder</b> |               |               |                          |        |
| No                                    | 53,560 (85.0) | 8,374 (13.3)  | 1,062 (1.7)              | <0.001 |
| Yes                                   | 6,401 (61.3)  | 3,205 (30.7)  | 831 (8.0)                |        |
| <b>Smoking Status</b>                 |               |               |                          |        |
| Never-smoker                          | 32,452 (80.4) | 6,819 (16.9)  | 1,104 (2.7)              | <0.001 |
| Ex-smoker                             | 13,541 (85.6) | 1,948 (12.3)  | 338 (2.1)                |        |
| Current smoker                        | 11,826 (80.8) | 2,414 (16.5)  | 403 (2.8)                |        |
| <b>Drinking Status</b>                |               |               |                          |        |
| Never-drinker                         | 29,746 (79.8) | 6,473(17.4)   | 1,067 (2.9)              | <0.001 |
| Ex-drinker                            | 2,259 (83.1)  | 381 (14.0)    | 80 (2.9)                 |        |
| Current drinker                       | 26,366 (83.6) | 4,451 (14.1)  | 715 (2.3)                |        |
| <b>Physical activity</b>              |               |               |                          |        |
| >= once per day                       | 9,266 (87.6)  | 1,136 (10.7)  | 179 (1.7)                | <0.001 |
| 2-4 times per week                    | 12,085 (83.9) | 2,008 (13.9)  | 309 (2.2)                |        |
| Once per week                         | 8,159 (82.4)  | 1,512 (15.3)  | 234 (2.4)                |        |
| Never                                 | 28,452 (78.5) | 6,633 (18.3)  | 1144 (3.2)               |        |
| <b>Hypertension History</b>           |               |               |                          |        |
| No                                    | 34,634 (80.8) | 7,002 (16.3)  | 1,216 (2.8)              | <0.001 |
| Yes                                   | 25,327 (82.8) | 4,577 (15.0)  | 677 (2.2)                |        |
| <b>Stroke History</b>                 |               |               |                          |        |
| No                                    | 56,835 (81.7) | 10,945 (15.7) | 1,799 (2.6)              | 0.580  |
| Yes                                   | 3,126 (81.1)  | 634 (14.5)    | 94 (2.4)                 |        |
| <b>Heart Disease History</b>          |               |               |                          |        |
| No                                    | 54,199 (81.9) | 10,268 (15.5) | 1,691 (2.6)              | <0.001 |

|    |                                  |               |              |             |                   |
|----|----------------------------------|---------------|--------------|-------------|-------------------|
| 1  |                                  |               |              |             |                   |
| 2  |                                  |               |              |             |                   |
| 3  |                                  |               |              |             |                   |
| 4  |                                  |               |              |             |                   |
| 5  | Yes                              | 5,762 (79.2)  | 1,311 (18.0) | 202 (10.7)  |                   |
| 6  | <b>Unemployment</b>              |               |              |             |                   |
| 7  |                                  |               |              |             |                   |
| 8  | No                               | 49,300 (83.3) | 8,599 (14.5) | 1,293 (2.2) | <0.001            |
| 9  |                                  |               |              |             |                   |
| 10 | Yes                              | 10,661 (74.9) | 2,980 (20.9) | 600 (4.2)   | Exacerbation of P |
| 11 | No                               |               | Yes          |             | dizziness         |
| 12 | <b>Decreased income</b>          |               |              |             |                   |
| 13 | <b>Sex</b>                       |               |              |             |                   |
| 14 | No                               | 49,841 (82.4) | 9,208 (15.2) | 1,432 (2.9) | <0.001            |
| 15 | Yes                              | 10,120 (78.1) | 2,371 (18.3) | 461 (3.6)   |                   |
| 16 | <b>Living arrangement</b>        |               |              |             |                   |
| 17 | Evacuation Shelter               | 610 (83.1)    | 106 (14.4)   | 213 (2.5)   | <0.001            |
| 18 | Temporary housing                | 5,674 (81.3)  | 1,107 (15.9) | 195 (2.8)   |                   |
| 19 | Rental house, apartment          | 18,133 (78.6) | 4,153 (18.0) | 796 (3.5)   |                   |
| 20 | Relatives' home                  | 2,252 (81.8)  | 423 (15.4)   | 78 (2.8)    |                   |
| 21 | Own home                         | 18,649 (86.3) | 2,669 (12.4) | 292 (1.4)   |                   |
| 22 | <b>Tsunami experience</b>        |               |              |             |                   |
| 23 | No                               | 48,194 (82.1) | 9,058 (15.4) | 1,424 (2.4) | <0.001            |
| 24 | Yes                              | 11,767 (79.7) | 2,521 (17.1) | 469 (3.2)   |                   |
| 25 | <b>Experience of the nuclear</b> |               |              |             |                   |
| 26 | <b>power plant accident</b>      |               |              |             |                   |
| 27 | No                               | 29,347 (83.8) | 4,977 (14.2) | 717 (2.1)   | <0.001            |
| 28 | Yes                              | 30,614 (79.7) | 6,602 (17.2) | 1,176 (3.1) |                   |
| 29 | <b>Damage of house</b>           |               |              |             |                   |
| 30 | No                               | 15,295 (82.5) | 2,843 (15.3) | 413 (2.2)   | <0.001            |
| 31 | A part of                        | 31,661 (83.3) | 5,913 (15.4) | 911 (2.4)   |                   |
| 32 | Half                             | 4,125 (79.0)  | 916 (17.5)   | 184 (3.5)   |                   |
| 33 | More than a half                 | 1,538 (78.4)  | 358 (18.2)   | 67 (3.4)    |                   |
| 34 | Totally                          | 3,086 (80.5)  | 620 (16.2)   | 126 (3.3)   |                   |
| 35 | <b>Loss of family member</b>     |               |              |             |                   |
| 36 | No                               | 10,802 (76.7) | 2,737 (19.4) | 552 (3.9)   | <0.001            |
| 37 | Yes                              | 46,887 (82.7) | 8,492 (15.0) | 1,291 (2.3) |                   |

545 ≥

546

547

548

|                                       |               |              |             |        |
|---------------------------------------|---------------|--------------|-------------|--------|
| Men                                   | 29,793 (92.2) | 2,167 (6.7)  | 341 (1.1)   | <0.001 |
| Women                                 | 35,306 (85.8) | 4,938 (12.0) | 888 (2.2)   |        |
| <b>Age</b>                            |               |              |             |        |
| 20-49                                 | 22,160 (88.5) | 2,360 (9.4)  | 507 (2.0)   | 0.905  |
| 50-64                                 | 19,103 (89.5) | 1,935 (9.1)  | 302 (1.4)   |        |
| >=65                                  | 23,836 (88.1) | 2,810 (10.4) | 420 (1.6)   |        |
| <b>Mental Health Status</b>           |               |              |             |        |
| <b>K6&lt;13</b>                       | 57,801 (91.2) | 4,863 (7.7)  | 695 (1.1)   | <0.001 |
| K6>=13                                | 7,298 (72.4)  | 2,242(22.3)  | 534 (5.3)   |        |
| <b>Post Traumatic Stress Disorder</b> |               |              |             |        |
| No                                    | 57,505 (91.3) | 4,838 (7.7)  | 653 (1.0)   | <0.001 |
| Yes                                   | 7,594 (72.8)  | 2,267 (21.7) | 576 (5.5)   |        |
| <b>Smoking Status</b>                 |               |              |             |        |
| Never-smoker                          | 35,541 (88.0) | 4,119 (10.2) | 715 (1.8)   | <0.001 |
| Ex-smoker                             | 14,228 (89.9) | 1,373 (8.7)  | 226 (1.4)   |        |
| Current smoker                        | 13,083 (89.4) | 1,302 (8.9)  | 258 (1.8)   |        |
| <b>Drinking Status</b>                |               |              |             |        |
| Never-drinker                         | 32,656 (87.6) | 3,956 (10.6) | 674 (1.8)   | <0.001 |
| Ex-drinker                            | 2,310 (84.9)  | 347 (12.8)   | 63 (2.3)    |        |
| Current drinker                       | 28,498 (90.4) | 2,571 (8.2)  | 463 (1.5)   |        |
| <b>Physical activity</b>              |               |              |             |        |
| >= once per day                       | 9,654(91.2)   | 796 (7.5)    | 131 (1.2)   | <0.001 |
| 2-4 times per week                    | 12,830 (89.1) | 1,327 (9.2)  | 245 (1.7)   |        |
| Once per week                         | 8,845 (89.3)  | 917 (9.3)    | 143 (1.4)   |        |
| Never                                 | 31,731(87.6)  | 3,811 (10.5) | 687 (1.9)   |        |
| <b>Hypertension History</b>           |               |              |             |        |
| No                                    | 38,476 (89.8) | 3,709 (8.7)  | 667 (1.6)   | <0.001 |
| Yes                                   | 26,623 (87.1) | 3,396 (11.1) | 562 (1.8)   |        |
| <b>Stroke History</b>                 |               |              |             |        |
| No                                    | 61,895 (89.0) | 6,538 (9.4)  | 1,146 (1.7) | <0.001 |
| Yes                                   | 3,204 (83.1)  | 567 (14.7)   | 83 (2.2)    |        |
| <b>Heart Disease History</b>          |               |              |             |        |
| No                                    | 59,187 (89.5) | 5,946 (9.0)  | 1,025 (1.6) | <0.001 |
| Yes                                   | 5,912 (81.3)  | 1,159 (15.9) | 204 (2.8)   |        |
| <b>Unemployment</b>                   |               |              |             |        |

|                                                       |               |              |           |        |
|-------------------------------------------------------|---------------|--------------|-----------|--------|
| No                                                    | 52,942 (89.4) | 5,376 (9.1)  | 874 (1.5) | <0.001 |
| Yes                                                   | 12,157 (85.4) | 1,729 (12.1) | 355 (2.5) |        |
| <b>Decreased income</b>                               |               |              |           |        |
| No                                                    | 53,767 (88.9) | 5,746 (9.5)  | 908 (1.6) | <0.001 |
| Yes                                                   | 11,332 (87.5) | 1,359 (10.5) | 264 (2.0) |        |
| <b>Living arrangement</b>                             |               |              |           |        |
| Evacuation Shelter                                    | 3,254 (89.3)  | 1,750 (15.6) | 227 (1.6) | <0.001 |
| Temporary housing                                     | 3,306 (85.7)  | 3,444 (8.1)  | 404 (2.0) |        |
| Rental house, apartment                               | 20,217 (87.6) | 2,376 (10.3) | 489 (2.1) | <0.001 |
| Relatives' home                                       | 2,436 (88.5)  | 264 (9.6)    | 53 (1.9)  |        |
| Own home                                              | 19,794 (91.6) | 1,617 (7.5)  | 199 (0.9) |        |
| <b>Tsunami experience</b>                             |               |              |           |        |
| No                                                    | 52,378 (89.3) | 5,390 (9.2)  | 908 (1.6) | <0.001 |
| Yes                                                   | 12,721 (86.2) | 1,715 (11.6) | 321 (2.2) |        |
| <b>Experience of the nuclear power plant accident</b> |               |              |           |        |
| No                                                    | 31,801 (90.8) | 2,814 (8.0)  | 426 (1.2) | <0.001 |
| Yes                                                   | 33,298 (86.7) | 4,291 (11.2) | 803 (2.1) |        |
| <b>Damage of house</b>                                |               |              |           |        |
| No                                                    | 16,762 (90.4) | 1,531 (8.3)  | 258 (1.4) | <0.001 |
| A part of                                             | 34,218 (88.9) | 3,667 (9.5)  | 600 (1.6) |        |
| Half                                                  | 4,480 (85.7)  | 616 (11.8)   | 129 (2.5) |        |
| More than a half                                      | 1,668 (85.0)  | 247 (12.6)   | 48 (2.5)  |        |
| Totally                                               | 3,308 (86.3)  | 438 (11.4)   | 86 (2.2)  |        |
| <b>Loss of family member</b>                          |               |              |           |        |
| No                                                    | 11,885 (84.3) | 1,843 (13.1) | 363 (2.6) | <0.001 |
| Yes                                                   | 50,854 (89.7) | 4,991 (8.8)  | 825 (1.5) |        |

549

550

551

552

|                              |               |               |             |        |  |
|------------------------------|---------------|---------------|-------------|--------|--|
| <b>Age</b>                   |               |               |             |        |  |
| 20-49                        | 23,317 (93.2) | 1,303 (5.2)   | 407 (1.6)   | <0.001 |  |
| 50-64                        | 19,478 (91.3) | 1,539 (7.2)   | 323 (1.5)   |        |  |
| >=65                         | 24,339 (89.9) | 2,372 (8.8)   | 355 (1.3)   |        |  |
| <b>Mental Health Status</b>  |               |               |             |        |  |
| K6<13                        | 59,443 (93.8) | 3,354 (5.3)   | 562 (0.9)   | <0.001 |  |
| K6>=13                       | 7,691 (76.4)  | 1,860 (18.5)  | 523 (5.2)   |        |  |
| <b>Post Traumatic Stress</b> |               |               |             |        |  |
| <b>Disorder</b>              |               |               |             |        |  |
| No                           | 59,105 (93.8) | 3,349 (5.3)   | 542 (0.9)   | <0.001 |  |
| Yes                          | 8,029 (76.9)  | 1,865 (17.9)  | 543 (5.2)   |        |  |
| <b>Smoking Status</b>        |               |               |             |        |  |
| Never-smoker                 | 36,836 (91.2) | 2,886 (7.2)   | 653 (1.6)   | <0.001 |  |
| Ex-smoker                    | 14,449 (91.3) | 1,164 (7.4)   | 214 (1.4)   |        |  |
| Current smoker               | 13,503 (92.2) | 944 (6.5)     | 196 (1.3)   |        |  |
| <b>Drinking Status</b>       |               |               |             |        |  |
| Never-drinker                | 33,888 (90.9) | 2,801 (7.5)   | 597 (1.6)   | <0.001 |  |
| Ex-drinker                   | 2,406 (88.5)  | 253 (9.3)     | 61 (2.2)    |        |  |
| Current drinker              | 29,119 (92.4) | 2,006 (6.4)   | 407 (1.3)   |        |  |
| <b>Physical activity</b>     |               |               |             |        |  |
| >= once per day              | 9,916 (93.7)  | 569 (5.4)     | 96 (0.9)    | <0.001 |  |
| 2-4 times per week           | 13,210 (91.7) | 997 (6.9)     | 195 (1.4)   |        |  |
| Once per week                | 9,090 (91.8)  | 676 (6.8)     | 139 (1.4)   |        |  |
| Never                        | 32,790 (90.5) | 2,802 (7.7)   | 637 (1.8)   |        |  |
| <b>Hypertension History</b>  |               |               |             |        |  |
| No                           | 39,969 (93.3) | 2,299 (5.4)   | 584 (1.4)   | <0.001 |  |
| Yes                          | 27,165 (88.8) | 2,915 (9.5)   | 501 (1.6)   |        |  |
| <b>Stroke History</b>        |               |               |             |        |  |
| No                           | 63,799 (91.7) | 4,757 (6.8)   | 1,799 (1.5) | <0.001 |  |
| Yes                          | 3,335 (86.5)  | 457 (11.9)    | 94 (1.6)    |        |  |
| <b>Heart Disease History</b> |               |               |             |        |  |
| No                           | 61,793 (93.3) | 10,268 (15.5) | 1,691 (2.6) | <0.001 |  |
| Yes                          | 5,441 (74.8)  | 1,311 (21.3)  | 202 (4.0)   |        |  |
| <b>Unemployment</b>          |               |               |             |        |  |
| No                           | 54,410 (91.9) | 3,992 (6.7)   | 790 (1.4)   | <0.001 |  |
| Yes                          | 12,724 (89.4) | 1,222 (8.6)   | 295 (2.1)   |        |  |

|                                                       |                  |                 |                                        |           |
|-------------------------------------------------------|------------------|-----------------|----------------------------------------|-----------|
| <b>Decreased income</b>                               |                  |                 |                                        |           |
| No                                                    | 55,339 (91.5)    | 4,272 (7.1)     | 870 (1.4)                              | 0.052     |
| Yes                                                   | 11,795 (91.1)    | 942 (7.3)       | 215 (1.7)                              |           |
| <b>Living arrangement</b>                             |                  |                 |                                        |           |
| Evacuation Shelter                                    | No<br>672 (91.6) | Yes<br>57 (7.8) | Exacerbation of<br>shortness of breath | P         |
| Temporary housing                                     | 6,339 (90.9)     | 548 (7.9)       | No. 89 (1.3)                           |           |
| Rental house, apartment                               | 20,762 (90.8)    | 2,809 (7.4)     | 2574 (11.8)                            | <0.001038 |
| Relative's home                                       | 3490 (92.6)      | 2,667 (8.5)     | 3692 (9.0)                             |           |
| Own home                                              | 20,178 (93.4)    | 1,223 (5.7)     | 45 (1.6)                               |           |
| <b>Age</b>                                            |                  |                 |                                        |           |
| <b>Tsunami experience</b>                             |                  |                 |                                        |           |
| 20-49                                                 | 24,022 (96.0)    | 858 (3.4)       | 147 (0.6)                              | <0.001    |
| No                                                    | 53,935 (91.9)    | 3,911 (6.7)     | 830 (1.4)                              | <0.001    |
| Yes                                                   | 13,199 (89.4)    | 1,303 (8.8)     | 255 (1.7)                              |           |
| <b>Experience of the nuclear power plant accident</b> |                  |                 |                                        |           |
| No                                                    | 32,691 (93.3)    | 1,992 (5.7)     | 358 (1.0)                              | <0.001    |
| Yes                                                   | 34,443 (89.7)    | 3,222 (8.4)     | 727 (1.9)                              |           |
| <b>Damage of house</b>                                |                  |                 |                                        |           |
| No                                                    | 17,284 (93.2)    | 1,034 (5.6)     | 233 (1.3)                              | <0.001    |
| A part of                                             | 35,128 (91.3)    | 2,798 (7.3)     | 559 (1.5)                              |           |
| Half                                                  | 4,684 (89.7)     | 458 (8.8)       | 83 (1.6)                               |           |
| More than a half                                      | 1,738 (88.5)     | 187 (9.5)       | 38 (1.9)                               |           |
| Totally                                               | 3,473 (90.6)     | 293 (7.7)       | 66 (1.7)                               |           |
| <b>Loss of family member</b>                          |                  |                 |                                        |           |
| No                                                    | 12,434 (88.2)    | 1,361 (9.7)     | 296 (2.1)                              | <0.001    |
| Yes                                                   | 52,250 (92.2)    | 3,661 (6.5)     | 759 (1.3)                              |           |

553

554

555

556



|                                       |               |              |           |        |
|---------------------------------------|---------------|--------------|-----------|--------|
| 50-64                                 | 19,821 (92.9) | 1,360 (6.4)  | 159 (0.8) |        |
| >=65                                  | 23,993 (88.7) | 2,753 (10.2) | 320 (0.4) |        |
| <b>Mental Health Status</b>           |               |              |           |        |
| <b>K6&lt;13</b>                       | 59,686 (94.2) | 3,318 (5.2)  | 355 (0.6) | <0.001 |
| K6>=13                                | 8,150 (80.9)  | 1,653 (16.4) | 271 (2.7) |        |
| <b>Post Traumatic Stress Disorder</b> |               |              |           |        |
| No                                    | 59,449 (94.4) | 3,224 (5.1)  | 323 (0.5) | <0.001 |
| Yes                                   | 8,387 (80.4)  | 1,747 (16.7) | 303 (2.9) |        |
| <b>Smoking Status</b>                 |               |              |           |        |
| Never-smoker                          | 37,690 (93.4) | 2,367 (5.9)  | 318 (0.8) | <0.001 |
| Ex-smoker                             | 14,298 (90.3) | 1,358 (8.6)  | 171 (1.1) |        |
| Current smoker                        | 13,522 (92.3) | 998 (6.8)    | 123 (0.8) |        |
| <b>Drinking Status</b>                |               |              |           |        |
| Never-drinker                         | 34,447 (92.4) | 2,516 (6.8)  | 323 (0.9) | 0.001  |
| Ex-drinker                            | 2,341 (86.1)  | 338 (12.4)   | 41 (1.5)  |        |
| Current drinker                       | 29,364 (93.1) | 1,920 (6.1)  | 248 (0.8) |        |
| <b>Physical activity</b>              |               |              |           |        |
| >= once per day                       | 9,934 (93.9)  | 578 (5.5)    | 69 (0.7)  | <0.001 |
| 2-4 times per week                    | 13,278 (92.2) | 1,001 (7.0)  | 123 (0.9) |        |
| Once per week                         | 9,136 (92.2)  | 672 (6.8)    | 97 (1.0)  |        |
| Never                                 | 33,405 (92.2) | 2,499 (6.9)  | 325 (0.9) |        |
| <b>Hypertension History</b>           |               |              |           |        |
| No                                    | 40,466 (94.9) | 1,912 (4.5)  | 276 (0.6) | <0.001 |
| Yes                                   | 27,172 (88.9) | 3,059 (10.0) | 350 (1.1) |        |
| <b>Stroke History</b>                 |               |              |           |        |
| No                                    | 64,581 (92.8) | 4,422 (6.4)  | 576 (0.8) | <0.001 |
| Yes                                   | 3,255 (84.5)  | 549 (14.2)   | 50 (1.3)  |        |
| <b>Heart Disease History</b>          |               |              |           |        |
| No                                    | 62,270 (94.1) | 3,456 (5.2)  | 432 (0.7) | <0.001 |
| Yes                                   | 5,566 (76.5)  | 1,515 (20.8) | 194 (2.7) |        |
| <b>Unemployment</b>                   |               |              |           |        |
| No                                    | 54,833 (92.6) | 3,889 (6.6)  | 470 (0.8) | <0.001 |
| Yes                                   | 13,003 (91.3) | 1,082 (7.6)  | 156 (1.1) |        |
| <b>Decreased income</b>               |               |              |           |        |
| No                                    | 55,879 (92.4) | 4,096 (6.8)  | 506 (0.8) | 0.584  |

|    |                                  |               |             |           |        |
|----|----------------------------------|---------------|-------------|-----------|--------|
| 5  | Yes                              | 11,957 (92.3) | 875 (6.8)   | 120 (0.9) |        |
| 6  | <b>Living arrangement</b>        |               |             |           |        |
| 8  | Evacuation Shelter               | 666 (90.7)    | 63 (8.6)    | 5 (0.7)   |        |
| 9  | Temporary housing                | 6,283 (90.1)  | 612 (8.8)   | 81 (1.2)  |        |
| 10 | Rental house, apartment          | 21,419 (92.8) | 1,439 (6.2) | 224 (1.0) | <0.001 |
| 11 | Relatives' home                  | 2,449 (90.8)  | 231 (8.4)   | 108 (0.5) |        |
| 12 | Own home                         | 20,247 (93.7) | 1,255 (5.8) | 29 (1.0)  |        |
| 13 | <b>Tsunami experience</b>        |               |             |           |        |
| 14 | No                               | 54,566 (93.0) | 3,652 (6.2) | 458 (0.8) | <0.001 |
| 15 | Yes                              | 13,270 (89.9) | 1,319 (8.9) | 168 (1.1) |        |
| 16 | <b>Experience of the nuclear</b> |               |             |           |        |
| 17 | <b>power plant accident</b>      |               |             |           |        |
| 18 | No                               | 33,023 (94.2) | 1,817 (5.2) | 201 (0.6) | <0.001 |
| 19 | Yes                              | 34,813 (90.7) | 3,154 (8.2) | 425 (1.1) |        |
| 20 | <b>Damage of house</b>           |               |             |           |        |
| 21 | No                               | 17,545 (94.6) | 903 (4.9)   | 103 (0.6) | <0.001 |
| 22 | A part of                        | 35,368 (91.9) | 2,770 (7.2) | 347 (0.9) |        |
| 23 | Half                             | 4,735 (90.6)  | 435 (8.3)   | 55 (1.1)  |        |
| 24 | More than a half                 | 1,760 (89.7)  | 180 (9.2)   | 23 (1.2)  |        |
| 25 | Totally                          | 3,510 (91.6)  | 279 (7.3)   | 43 (1.1)  |        |
| 26 | <b>Loss of family member</b>     |               |             |           |        |
| 27 | No                               | 12,589 (89.3) | 1,303 (9.3) | 199 (1.4) | 0.096  |
| 28 | Yes                              | 52,823 (93.2) | 3,443 (6.1) | 404 (0.7) |        |

557

558

559

Table 2. Odds ratios (OR) and 95% CIs for Post Traumatic Stress Disorder on multiple logistic regression analyses

|                           |                             | Exacerbation of Headache  |                        |                                |                                              |
|---------------------------|-----------------------------|---------------------------|------------------------|--------------------------------|----------------------------------------------|
|                           |                             | OR(95%CI) <sup>a</sup>    | OR(95%CI) <sup>b</sup> | OR(95%CI) for men <sup>b</sup> | OR(95%CI) <sup>f</sup> or women <sup>b</sup> |
| <b>living arrangement</b> | <b>Own home (Reference)</b> | 1.00(reference)           | 1.00(reference)        | 1.00(reference)                | 1.00(reference)                              |
|                           | Relatives' home             | 2.03 (1.58-2.62)          | 1.58 (1.20-2.09)       | 1.97 (1.12-3.47)               | 1.46 (1.06-2.01)                             |
|                           | Rental house, apartment     | 2.21 (1.93-2.54)          | 1.55 (1.32-1.81)       | 1.85 (1.34-2.54)               | 1.46 (1.22-1.75)                             |
|                           | Evacuation Shelter          | 2.01 (1.24-3.25)          | 1.80 (1.10-2.97)       | 2.24 (0.99-5.07)               | 1.61 (0.85-3.03)                             |
|                           | Temporary housing           | 2.13 (1.77-2.56)          | 1.42 (1.15-1.75)       | 1.67 (1.10-2.54)               | 1.36 (1.06-1.73)                             |
| <b>Unemployment</b>       | <b>No (reference)</b>       | 1.00(reference)           | 1.00(reference)        | 1.00(reference)                | 1.00(reference)                              |
|                           | Yes                         | 1.70 (1.53-1.88)          | 1.28 (1.12-1.46)       | 1.35 (1.04-1.77)               | 1.26 (1.08-1.47)                             |
| <b>Decreased income</b>   | <b>No (reference)</b>       | 1.00(reference)           | 1.00(reference)        | 1.00(reference)                | 1.00(reference)                              |
|                           | Yes                         | 1.56 (1.40-1.74)          | 1.39 (1.21-1.60)       | 1.38 (1.08-1.77)               | 1.39 (1.17-1.63)                             |
|                           |                             | Exacerbation of Dizziness |                        |                                |                                              |
|                           |                             | OR(95%CI) <sup>a</sup>    | OR(95%CI) <sup>b</sup> | OR(95%CI) for men <sup>b</sup> | OR(95%CI) <sup>f</sup> or women <sup>b</sup> |
| <b>living arrangement</b> | <b>Own home (Reference)</b> | 1.00(reference)           | 1.00(reference)        | 1.00(reference)                | 1.00(reference)                              |
|                           | Relatives' home             | 1.98 (1.46-2.69)          | 1.43 (1.02-1.98)       | 0.97 (0.49-1.92)               | 1.64 (1.13-2.43)                             |
|                           | Rental house, apartment     | 2.27 (1.91-2.69)          | 1.45 (1.20-1.76)       | 1.28 (0.92-1.79)               | 1.55 (1.23-1.96)                             |
|                           | Evacuation Shelter          | 1.84 (1.02-3.32)          | 1.37 (0.73-2.65)       | 0.85 (0.26-2.76)               | 1.79 (0.85-3.77)                             |
|                           | Temporary housing           | 2.09 (1.68-2.61)          | 1.39 (1.08-1.78)       | 1.50 (1.00-2.27)               | 1.34 (0.99-1.83)                             |
| <b>Unemployment</b>       | <b>No (reference)</b>       | 1.00(reference)           | 1.00(reference)        | 1.00(reference)                | 1.00(reference)                              |
|                           | Yes                         | 1.65 (1.45-1.87)          | 1.26 (1.07-1.48)       | 1.12 (0.83-1.50)               | 1.23 (0.99-1.52)                             |
| <b>Decreased income</b>   | <b>No (reference)</b>       | 1.00(reference)           | 1.00(reference)        | 1.00(reference)                | 1.00(reference)                              |
|                           | Yes                         | 1.37 (1.19-1.57)          | 1.18 (0.99-1.41)       | 1.00 (0.74-1.36)               | 1.12 (0.91-1.40)                             |

|                           |                             | Exacerbation of Palpitation |                        |                                |                                  |
|---------------------------|-----------------------------|-----------------------------|------------------------|--------------------------------|----------------------------------|
|                           |                             | OR(95%CI) <sup>a</sup>      | OR(95%CI) <sup>b</sup> | OR(95%CI) for men <sup>b</sup> | OR(95%CI) for women <sup>b</sup> |
| <b>living arrangement</b> | <b>Own home (Reference)</b> | 1.00(reference)             | 1.00(reference)        | 1.00(reference)                | 1.00(reference)                  |
|                           | Relatives' home             | 1.70 (1.23-2.34)            | 1.24 (0.87-1.75)       | 1.25 (0.57-2.72)               | 1.21 (0.82-1.79)                 |
|                           | Rental house, apartment     | 1.90 (1.60-2.25)            | 1.25 (1.03-1.51)       | 1.73 (1.17-2.54)               | 1.11 (0.89-1.39)                 |
|                           | Evacuation Shelter          | 0.74 (0.30-1.80)            | 0.51 (0.19-1.38)       | 0.92 (0.22-3.90)               | 0.35 (0.09-1.43)                 |
|                           | Temporary housing           | 1.32 (1.03-1.69)            | 0.82 (0.61-1.09)       | 1.18 (0.68-2.02)               | 0.72 (0.51-1.01)                 |
| <b>Unemployment</b>       | <b>No (reference)</b>       | 1.00(reference)             | 1.00(reference)        | 1.00(reference)                | 1.00(reference)                  |
|                           | Yes                         | 1.46 (1.27-1.68)            | 1.22 (1.02-1.46)       | 1.46 (1.05-2.02)               | 1.01 (0.79-1.28)                 |
| <b>Decreased income</b>   | <b>No (reference)</b>       | 1.00(reference)             | 1.00(reference)        | 1.00(reference)                | 1.00(reference)                  |
|                           | Yes                         | 1.24 (1.07-1.44)            | 1.14 (0.94-1.38)       | 0.84 (0.58-1.19)               | 1.06 (0.84-1.33)                 |

|                           |                             | Exacerbation of Shortness of Breath |                        |                                |                                  |
|---------------------------|-----------------------------|-------------------------------------|------------------------|--------------------------------|----------------------------------|
|                           |                             | OR(95%CI) <sup>a</sup>              | OR(95%CI) <sup>b</sup> | OR(95%CI) for men <sup>b</sup> | OR(95%CI) for women <sup>b</sup> |
| <b>living arrangement</b> | <b>Own home (Reference)</b> | 1.00(reference)                     | 1.00(reference)        | 1.00(reference)                | 1.00(reference)                  |
|                           | Relatives' home             | 1.60 (1.02-2.52)                    | 1.15 (0.70-1.89)       | 0.95 (0.42-2.14)               | 1.33 (0.71-2.49)                 |
|                           | Rental house, apartment     | 2.34 (1.85-2.96)                    | 1.75 (1.35-2.27)       | 1.48 (1.00-2.20)               | 1.98 (1.39-2.81)                 |
|                           | Evacuation Shelter          | 1.33 (0.54-3.27)                    | 1.21 (0.48-3.01)       | 1.73 (0.61-4.97)               | 0.52 (0.07-3.81)                 |
|                           | Temporary housing           | 2.29 (1.72-3.06)                    | 1.50 (1.07-2.09)       | 1.27 (0.76-2.13)               | 1.73 (1.11-2.69)                 |
| <b>Unemployment</b>       | <b>No (reference)</b>       | 1.00(reference)                     | 1.00(reference)        | 1.00(reference)                | 1.00(reference)                  |
|                           | Yes                         | 1.55 (1.29-1.87)                    | 1.13 (0.89-1.47)       | 1.19 (0.83-1.69)               | 1.10 (0.77-1.57)                 |
| <b>Decreased income</b>   | <b>No (reference)</b>       | 1.00(reference)                     | 1.00(reference)        | 1.00(reference)                | 1.00(reference)                  |
|                           | Yes                         | 1.24 (1.01-1.52)                    | 1.14 (0.89-1.47)       | 1.14 (0.80-1.62)               | 0.91 (0.65-1.28)                 |

a. Adjusted for age and sex.

- 1  
2  
3 b. Further adjusted for drinking status (once or more per month, ex-drinker, less than once per month), smoking status (non-smoker, ex-smoker, current smoker), mental health distress (K6<3,  
4 K6>=13), hypertension history (yes or no), stroke history (yes or no), heart disease history (yes or no), physical activities (>= once per day, 2-4 times per week, once per week, never),  
5 tsunami experience (yes or no), radiation experience (yes or no), damage of house (no, a part of, half, more than a half, totally), loss of family member (yes or no).  
6  
7  
8  
9  
10  
11  
12  
13  
14  
15  
16  
17  
18  
19  
20  
21  
22  
23  
24  
25  
26  
27  
28  
29  
30  
31  
32  
33  
34  
35  
36  
37  
38  
39  
40  
41  
42  
43  
44  
45  
46  
47  
48  
49

For peer review only

## STROBE Statement—checklist of items that should be included in reports of observational studies

|                                    | Item No | Recommendation                                                                                                                                                                                                                                                                                                                                                                                                                                                                                                                                                                                                                                                                                   |
|------------------------------------|---------|--------------------------------------------------------------------------------------------------------------------------------------------------------------------------------------------------------------------------------------------------------------------------------------------------------------------------------------------------------------------------------------------------------------------------------------------------------------------------------------------------------------------------------------------------------------------------------------------------------------------------------------------------------------------------------------------------|
| <b>Title and abstract (P1-4)</b>   | 1       | (a) Indicate the study's design with a commonly used term in the title or the abstract<br>(b) Provide in the abstract an informative and balanced summary of what was done and what was found                                                                                                                                                                                                                                                                                                                                                                                                                                                                                                    |
| <b>Introduction (P6-7)</b>         |         |                                                                                                                                                                                                                                                                                                                                                                                                                                                                                                                                                                                                                                                                                                  |
| Background/rationale (P6)          | 2       | Explain the scientific background and rationale for the investigation being reported                                                                                                                                                                                                                                                                                                                                                                                                                                                                                                                                                                                                             |
| Objectives (P7)                    | 3       | State specific objectives, including any prespecified hypotheses                                                                                                                                                                                                                                                                                                                                                                                                                                                                                                                                                                                                                                 |
| <b>Methods (P7-11)</b>             |         |                                                                                                                                                                                                                                                                                                                                                                                                                                                                                                                                                                                                                                                                                                  |
| Study design (P7)                  | 4       | Present key elements of study design early in the paper                                                                                                                                                                                                                                                                                                                                                                                                                                                                                                                                                                                                                                          |
| Setting (P7)                       | 5       | Describe the setting, locations, and relevant dates, including periods of recruitment, exposure, follow-up, and data collection                                                                                                                                                                                                                                                                                                                                                                                                                                                                                                                                                                  |
| Participants (P7)                  | 6       | (a) <i>Cohort study</i> —Give the eligibility criteria, and the sources and methods of selection of participants. Describe methods of follow-up<br><i>Case-control study</i> —Give the eligibility criteria, and the sources and methods of case ascertainment and control selection. Give the rationale for the choice of cases and controls<br><i>Cross-sectional study</i> —Give the eligibility criteria, and the sources and methods of selection of participants<br>(b) <i>Cohort study</i> —For matched studies, give matching criteria and number of exposed and unexposed<br><i>Case-control study</i> —For matched studies, give matching criteria and the number of controls per case |
| Variables (P8-P10)                 | 7       | Clearly define all outcomes, exposures, predictors, potential confounders, and effect modifiers. Give diagnostic criteria, if applicable                                                                                                                                                                                                                                                                                                                                                                                                                                                                                                                                                         |
| Data sources/ measurement (P8-P10) | 8*      | For each variable of interest, give sources of data and details of methods of assessment (measurement). Describe comparability of assessment methods if there is more than one group                                                                                                                                                                                                                                                                                                                                                                                                                                                                                                             |
| Bias (None)                        | 9       | Describe any efforts to address potential sources of bias                                                                                                                                                                                                                                                                                                                                                                                                                                                                                                                                                                                                                                        |
| Study size (P7-8)                  | 10      | Explain how the study size was arrived at                                                                                                                                                                                                                                                                                                                                                                                                                                                                                                                                                                                                                                                        |
| Quantitative variables (P8-10)     | 11      | Explain how quantitative variables were handled in the analyses. If applicable, describe which groupings were chosen and why                                                                                                                                                                                                                                                                                                                                                                                                                                                                                                                                                                     |
| Statistical methods (P10-11)       | 12      | (a) Describe all statistical methods, including those used to control for confounding<br>(b) Describe any methods used to examine subgroups and interactions<br>(c) Explain how missing data were addressed<br>(d) <i>Cohort study</i> —If applicable, explain how loss to follow-up was addressed<br><i>Case-control study</i> —If applicable, explain how matching of cases and controls was addressed<br><i>Cross-sectional study</i> —If applicable, describe analytical methods taking account of sampling strategy<br>(e) Describe any sensitivity analyses                                                                                                                                |

Continued on next page

**Results (P11-14)**

|                           |     |                                                                                                                                                                                                                                                                                                                                                                                                               |
|---------------------------|-----|---------------------------------------------------------------------------------------------------------------------------------------------------------------------------------------------------------------------------------------------------------------------------------------------------------------------------------------------------------------------------------------------------------------|
| Participants (P11-12)     | 13* | (a) Report numbers of individuals at each stage of study—eg numbers potentially eligible, examined for eligibility, confirmed eligible, included in the study, completing follow-up, and analysed<br>(b) Give reasons for non-participation at each stage<br>(c) Consider use of a flow diagram                                                                                                               |
| Descriptive data (P11-13) | 14* | (a) Give characteristics of study participants (eg demographic, clinical, social) and information on exposures and potential confounders<br>(b) Indicate number of participants with missing data for each variable of interest<br>(c) <i>Cohort study</i> —Summarise follow-up time (eg, average and total amount)                                                                                           |
| Outcome data (P11)        | 15* | <i>Cohort study</i> —Report numbers of outcome events or summary measures over time<br><i>Case-control study</i> —Report numbers in each exposure category, or summary measures of exposure<br><i>Cross-sectional study</i> —Report numbers of outcome events or summary measures                                                                                                                             |
| Main results (P13-14)     | 16  | (a) Give unadjusted estimates and, if applicable, confounder-adjusted estimates and their precision (eg, 95% confidence interval). Make clear which confounders were adjusted for and why they were included<br>(b) Report category boundaries when continuous variables were categorized<br>(c) If relevant, consider translating estimates of relative risk into absolute risk for a meaningful time period |
| Other analyses<br>None    | 17  | Report other analyses done—eg analyses of subgroups and interactions, and sensitivity analyses                                                                                                                                                                                                                                                                                                                |

**Discussion (P14-18)**

|                          |    |                                                                                                                                                                            |
|--------------------------|----|----------------------------------------------------------------------------------------------------------------------------------------------------------------------------|
| Key results (P14-18)     | 18 | Summarise key results with reference to study objectives                                                                                                                   |
| Limitations (P18)        | 19 | Discuss limitations of the study, taking into account sources of potential bias or imprecision. Discuss both direction and magnitude of any potential bias                 |
| Interpretation (P14-18)  | 20 | Give a cautious overall interpretation of results considering objectives, limitations, multiplicity of analyses, results from similar studies, and other relevant evidence |
| Generalisability<br>None | 21 | Discuss the generalisability (external validity) of the study results                                                                                                      |

**Other information (P19)**

|               |    |                                                                                                                                                               |
|---------------|----|---------------------------------------------------------------------------------------------------------------------------------------------------------------|
| Funding (P19) | 22 | Give the source of funding and the role of the funders for the present study and, if applicable, for the original study on which the present article is based |
|---------------|----|---------------------------------------------------------------------------------------------------------------------------------------------------------------|

\*Give information separately for cases and controls in case-control studies and, if applicable, for exposed and unexposed groups in cohort and cross-sectional studies.

**Note:** An Explanation and Elaboration article discusses each checklist item and gives methodological background and published examples of transparent reporting. The STROBE checklist is best used in conjunction with this article (freely available on the Web sites of PLoS Medicine at <http://www.plosmedicine.org/>, Annals of Internal Medicine at <http://www.annals.org/>, and Epidemiology at <http://www.epidem.com/>). Information on the STROBE Initiative is available at [www.strobe-statement.org](http://www.strobe-statement.org).

# BMJ Open

## Associations of socioeconomic factors after a disaster with cardiovascular related symptoms among evacuees after the Great East Japan Earthquake in a cross-sectional study: the Fukushima Health Management Survey

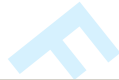

|                                 |                                                                                                                                                                                                                                                                                                                                                                                                                                                                                                                                                                                                                                                                                                                                                                                                                                                                                                                                                                                                                                                                                                                                                                                                                                                                                                                                                                                                                                                                                                                                                                                                                                                                                                                                                                                                                           |
|---------------------------------|---------------------------------------------------------------------------------------------------------------------------------------------------------------------------------------------------------------------------------------------------------------------------------------------------------------------------------------------------------------------------------------------------------------------------------------------------------------------------------------------------------------------------------------------------------------------------------------------------------------------------------------------------------------------------------------------------------------------------------------------------------------------------------------------------------------------------------------------------------------------------------------------------------------------------------------------------------------------------------------------------------------------------------------------------------------------------------------------------------------------------------------------------------------------------------------------------------------------------------------------------------------------------------------------------------------------------------------------------------------------------------------------------------------------------------------------------------------------------------------------------------------------------------------------------------------------------------------------------------------------------------------------------------------------------------------------------------------------------------------------------------------------------------------------------------------------------|
| Journal:                        | <i>BMJ Open</i>                                                                                                                                                                                                                                                                                                                                                                                                                                                                                                                                                                                                                                                                                                                                                                                                                                                                                                                                                                                                                                                                                                                                                                                                                                                                                                                                                                                                                                                                                                                                                                                                                                                                                                                                                                                                           |
| Manuscript ID                   | bmjopen-2016-014077.R1                                                                                                                                                                                                                                                                                                                                                                                                                                                                                                                                                                                                                                                                                                                                                                                                                                                                                                                                                                                                                                                                                                                                                                                                                                                                                                                                                                                                                                                                                                                                                                                                                                                                                                                                                                                                    |
| Article Type:                   | Research                                                                                                                                                                                                                                                                                                                                                                                                                                                                                                                                                                                                                                                                                                                                                                                                                                                                                                                                                                                                                                                                                                                                                                                                                                                                                                                                                                                                                                                                                                                                                                                                                                                                                                                                                                                                                  |
| Date Submitted by the Author:   | 29-Dec-2016                                                                                                                                                                                                                                                                                                                                                                                                                                                                                                                                                                                                                                                                                                                                                                                                                                                                                                                                                                                                                                                                                                                                                                                                                                                                                                                                                                                                                                                                                                                                                                                                                                                                                                                                                                                                               |
| Complete List of Authors:       | Zhang, Wen; Fukushima Medical University School of Medicine, Epidemiology<br>Ohira, Tetsuya; Fukushima Medical University, Radiation Medical Science Center for the Fukushima Health Management Survey; Fukushima Medical University School of Medicine, Epidemiology<br>Yasumura, Seiji; Fukushima Medical University<br>Maeda, Masaharu ; Fukushima Medical University, Radiation Medical Science Center for the Fukushima Health Management Survey; Fukushima Medical University School of Medicine, Disaster Psychiatry<br>Ohtsuru, Akira; Fukushima Medical University,<br>Harigane, Mayumi; Radiation Medical Science Center for the Fukushima Health Management Survey<br>Horikoshi, Naoko; Radiation Medical Science Center for the Fukushima Health Management Survey,<br>Suzuki, Yuriko; National Institute of Mental Health, National Center of Neurology and Psychiatry,<br>Yabe, Hirooki; Fukushima Medical University School of Medicine, Neuropsychiatry; Radiation Medical Science Center for the Fukushima Health Management Survey<br>Nagai, Masato<br>Nakano, Hironori ; Fukushima Medical University, Radiation Medical Science Center for the Fukushima Health Management Survey; Fukushima Medical University School of Medicine, Epidemiology<br>Hirosaki, Mayumi; Fukushima Medical University School of Medicine, Epidemiology<br>Uemura, Mayu; Fukushima Medical University School of Medicine, Epidemiology<br>Takahashi, Hideto; Fukushima Medical University School of Medicine, Information Management and Statistics Office; Fukushima Medical University School of Medicine, Radiation Medical Science Center for the Fukushima Health Management Survey<br>Kiyama, Kenji<br>Yamashita, Shunichi ; Nagasaki University School of Medicine<br>Abe, Masafumi; Fukushima Medical University, |
| <b>Primary Subject Heading</b>: | Epidemiology                                                                                                                                                                                                                                                                                                                                                                                                                                                                                                                                                                                                                                                                                                                                                                                                                                                                                                                                                                                                                                                                                                                                                                                                                                                                                                                                                                                                                                                                                                                                                                                                                                                                                                                                                                                                              |
| Secondary Subject Heading:      | Epidemiology, Sociology                                                                                                                                                                                                                                                                                                                                                                                                                                                                                                                                                                                                                                                                                                                                                                                                                                                                                                                                                                                                                                                                                                                                                                                                                                                                                                                                                                                                                                                                                                                                                                                                                                                                                                                                                                                                   |



1  
2  
3  
4  
5  
6  
7  
8  
9  
10  
11  
12  
13  
14  
15  
16  
17  
18  
19  
20  
21  
22  
23  
24  
25  
26  
27  
28  
29  
30  
31  
32  
33  
34  
35  
36  
37  
38  
39  
40  
41  
42  
43  
44  
45  
46  
47  
48  
49  
50  
51  
52  
53  
54  
55  
56  
57  
58  
59  
60

|           |                                                                                     |
|-----------|-------------------------------------------------------------------------------------|
| Keywords: | Great East Japan Earthquake, socioeconomic factors, cardiovascular related symptoms |
|           |                                                                                     |

SCHOLARONE™  
Manuscripts

For peer review only

1  
2  
3  
4  
5  
6  
7  
8  
9  
10  
11  
12  
13  
14  
15  
16  
17  
18  
19  
20  
21  
22  
23  
24  
25  
26  
27  
28  
29  
30  
31  
32  
33  
34  
35  
36  
37  
38  
39  
40  
41  
42  
43  
44  
45  
46  
47  
48  
49  
50  
51  
52  
53  
54  
55  
56  
57  
58  
59  
60

1 **Associations of socioeconomic factors after a disaster with**  
2 **cardiovascular related symptoms among evacuees after the**  
3 **Great East Japan Earthquake in a cross-sectional study: the**  
4 **Fukushima Health Management Survey**

5  
6 Wen Zhang<sup>1,2</sup>, Tetsuya Ohira<sup>1,2</sup>, Seiji Yasumura<sup>1,3</sup>, Masaharu Maeda<sup>1,4</sup>,  
7 Akira Otsuru<sup>1,5</sup>, Mayumi Harigane<sup>1</sup>, Naoko Horikoshi<sup>1</sup>, Yuriko Suzuki<sup>1,6</sup>,  
8 Hirooki Yabe<sup>1,7</sup>, Masato Nagai<sup>1,2</sup>, Hironori Nakano<sup>1,2</sup>, Mayumi Hirosaki<sup>2</sup>,  
9 Mayu Uemura<sup>2</sup>, Hideto Takahashi<sup>1</sup>, Kenji Kamiya<sup>1,8</sup>, Shunichi Yamashita<sup>1,9</sup>,  
10 Masafumi Abe<sup>1</sup>, for the Fukushima Health Management Survey Group

- 11  
12 1. Radiation Medical Science Center for the Fukushima Health Management  
13 Survey, Fukushima, Japan  
14 2. Department of Epidemiology, School of Medicine, Fukushima Medical  
15 University, Fukushima, Japan  
16 3. Department of Public Health, School of Medicine, Fukushima Medical  
17 University, Fukushima, Japan  
18 4. Department of Disaster Psychiatry, School of Medicine, Fukushima Medical  
19 University, Fukushima, Japan  
20 5. Department of Radiation Health Management, Fukushima Medical University,  
21 Fukushima, Japan  
22 6. National Institute of Mental Health, National Center of Neurology and  
23 Psychiatry, Tokyo, Japan

- 1  
2  
3  
4  
5  
6 24 7. Department of Neuropsychiatry, School of Medicine, Fukushima Medical  
7  
8 25 University, Fukushima, Japan  
9  
10 26 8. Department of Experimental Oncology, Research Institute for Radiation Biology  
11  
12 27 and Medicine, Hiroshima University, Hiroshima, Japan  
13  
14 28 9. Japan and Atomic Bomb Disease Institute, Nagasaki University, Nagasaki,  
15  
16 29 Japan  
17  
18  
19  
20  
21  
22  
23  
24  
25  
26  
27  
28  
29  
30  
31  
32

33 **Correspondence:**

34 Wen Zhang, PHD

35 Department of Epidemiology, School of Medicine, Fukushima Medical University, 1

36 Hikariga-oka, Fukushima City 960-1295, JAPAN

37 Phone: +81-24-547-1343; Fax: +81-24-547-1336

38 E-mail: [zhangw09@fmu.ac.jp](mailto:zhangw09@fmu.ac.jp)  
39  
40  
41  
42  
43  
44  
45  
46  
47  
48  
49  
50  
51  
52  
53  
54  
55  
56  
57  
58  
59  
60

1  
2  
3  
4  
5  
6  
7  
8  
9  
10  
11  
12  
13  
14  
15  
16  
17  
18  
19  
20  
21  
22  
23  
24  
25  
26  
27  
28  
29  
30  
31  
32  
33  
34  
35  
36  
37  
38  
39  
40  
41  
42  
43  
44  
45  
46  
47  
48  
49  
50  
51  
52  
53  
54  
55  
56  
57  
58  
59  
60

49 **Abstract**

50 **Objective:** To investigate the association between socioeconomic factors and the  
51 exacerbation of cardiovascular symptoms among evacuees after Great East Japan  
52 Earthquake.

53 **Methods:** A total of 73,433 subjects were included in the Fukushima Health  
54 Management survey. Exacerbation of headache, dizziness, palpitations, and shortness  
55 of breath were determined from self-report questionnaires. Socioeconomic factors  
56 included living arrangement, loss of employment, decreased income and educational  
57 years. Odds ratios (OR) and 95% confidence intervals (CI) of socioeconomic factors  
58 were estimated for each symptom using multiple logistic regression analyses.

59 **Results:** A total of 1,893 (2.6%) individuals reported exacerbation of headache, 1,229  
60 (1.7%) of dizziness, 1,085 (1.5%) of palpitations, and 626 (0.9%) of shortness of breath.  
61 Evacuation accommodation was associated with all the above symptoms. Compared to  
62 participants living in their own home (OR=1.00), subjects living in relatives' homes had  
63 increased odds of experiencing exacerbation of headache (1.58; 95% CI 1.19–2.09)  
64 and dizziness (1.42; 95% CI 1.02–1.98); subjects living in rental houses or apartments  
65 showed exacerbation of headache (1.54; 95% CI 1.32–1.80), dizziness (1.45; 95% CI  
66 1.20–1.75), palpitations (1.25; 95% CI 1.03–1.51), and shortness of breath (1.76; 95%  
67 CI 1.35–2.28); subjects living in evacuation shelters showed exacerbation of headache  
68 (1.80; 95% CI 1.09–2.96); and refugees living in temporary housing showed  
69 exacerbated headache (1.42; 95% CI 1.15–1.75), dizziness (1.40; 95% CI 1.09–1.79),  
70 and shortness of breath (1.49; 95% CI 1.07–2.08). Compared to the evacuees that  
71 retained their jobs, unemployed subjects showed increased odds for exacerbation of  
72 headache (1.28, 95% CI 1.12–1.46), dizziness (1.26, 95% CI 1.07–1.48), and

1  
2  
3  
4  
5  
6 73 palpitations (1.21, 95% CI 1.01–1.45). Decreased income was associated with  
7  
8 74 exacerbation of headache (1.39, 95% CI 1.22–1.60).

9  
10 75 **Conclusion:** After the earthquake, living in non-home conditions was more likely to  
11  
12 76 exacerbate cardiovascular symptoms among evacuees. Loss of employment was  
13  
14 77 another risk factor for exacerbated headache and dizziness.

15  
16  
17 78

18  
19 79

20  
21 80 **Keywords:** Great East Japan Earthquake, socioeconomic factors, cardiovascular  
22  
23 81 related symptoms

24  
25 82

26  
27 83

28  
29 84

30  
31 85

32  
33 86

34  
35 87

36  
37 88

38  
39 89

40  
41 90

42  
43 91

44  
45 92

46  
47 93

48  
49 94

50  
51 95

52  
53 96

1  
2  
3  
4  
5  
6 97 **Strengths and limitations of this study**  
7

- 8 ● We examined the associations of socioeconomic factors after a disaster with  
9  
10 cardiovascular related symptoms among evacuees of the number of 73,433  
11  
12 subjects after the Great East Japan earthquake.  
13  
14 ● Our study is the first to identify an inverse relationship between low socioeconomic  
15  
16 status and exacerbated cardiovascular symptoms from an evacuee self-report after  
17  
18 a disaster.  
19  
20 ● A limitation of the present study was an overall response rate was low (40.7%) and  
21  
22 data may have contained sampling biases.  
23  
24 ● Another limitation of the present study should be that the information of changes in  
25  
26 family relationships (e.g., death, physical separation) among the evacuees after the  
27  
28 disaster has not been captured.  
29  
30 ● In addition, most questionnaires were collected in the same period (from Jan 2012  
31  
32 to Mar 2012).  
33  
34  
35  
36  
37  
38  
39  
40  
41  
42  
43  
44  
45  
46  
47  
48  
49  
50  
51  
52  
53  
54  
55  
56  
57  
58  
59  
60

1  
2  
3  
4  
5  
6 121 **Introduction**

7  
8 122 The Great East Japan Earthquake and the subsequent Fukushima Daiichi nuclear  
9  
10 123 disaster, which occurred in March 2011, was the most destructive catastrophe in Japan  
11  
12 124 to date. Due to concerns over released radiation, most of the residents in nearby towns  
13  
14 125 were forced to evacuate and consequently suffered long-lasting anxiety. Shortly after  
15  
16 126 the disaster, a Fukushima Health Management Survey was conducted to investigate the  
17  
18 127 effects of long-term low-dose radiation exposure caused by the accident and to assess  
19  
20 128 the physical and mental wellbeing of evacuees. This survey included a basic survey,  
21  
22 129 which estimated individual radiation exposure of each resident, and four detailed  
23  
24 130 surveys comprising of a Comprehensive Health Check and thyroid ultrasonography, a  
25  
26 131 mental health and lifestyle survey, and a survey of pregnant women and nursing  
27  
28 132 mothers (1). The Mental Health and Lifestyle Survey used self-report questionnaires to  
29  
30 133 investigate health status and lifestyle of the refugees, including nutrition and diet,  
31  
32 134 perceived symptoms of illness, disaster-related experience, and socioeconomic  
33  
34 135 determinants.

35  
36  
37  
38 136 Several previous studies have shown changes in the incidence of cardiovascular  
39  
40 137 events following disasters; however, results are conflicting (2-14). A recent study  
41  
42 138 reported a heterogeneous occurrence of cardiovascular events after the Great East  
43  
44 139 Japan Earthquake (2), while another study reported a significant increase in the  
45  
46 140 incidence of cardioembolic stroke after the earthquake (10). However, neither study  
47  
48 141 examined the incidence of perceived cardiovascular disease symptoms after a disaster,  
49  
50 142 nor did they focus on the effect of refugee socioeconomic status on health problems  
51  
52 143 during their evacuation term. However, considering these aspects is relevant for  
53  
54  
55  
56  
57  
58  
59  
60

1  
2  
3  
4  
5  
6 144 reviewing refugee health status, accessing the incidence of various diseases, and  
7  
8 145 providing health guidelines for refugees.  
9

10 146 Consequently, we conducted the present study to investigate the risk factors of  
11  
12 147 perceived cardiovascular symptoms following a major disaster. In the present study,  
13  
14 148 socioeconomic determinants included educational years, living arrangement, change of  
15  
16 149 employment and income. Due to the special post-disaster situation, change of  
17  
18 150 employment and income due to the disaster, instead of job and income level were  
19  
20 151 captured. Thus in the present study, a decrease or low socioeconomic status was  
21  
22 152 considered as less educational years, living in non-home conditions, unemployment or  
23  
24 153 decreased income due to the disaster. We hypothesized that a decrease in  
25  
26 154 socioeconomic status due to the earthquake would be associated with exacerbated  
27  
28 155 cardiovascular symptoms among evacuees.  
29  
30  
31

32 156

## 33 34 157 **Methods**

### 35 36 158 **Participants**

37  
38 159 The primary purpose of the Fukushima Health Management Survey was to monitor  
39  
40 160 the long-term health and lifestyle of Fukushima residents and to provide them with  
41  
42 161 appropriate care (15). The Fukushima Health Management Survey consists of a basic  
43  
44 162 survey and four detailed surveys, namely, the thyroid ultrasound examination,  
45  
46 163 comprehensive health check, mental health and lifestyle survey, and pregnancy and  
47  
48 164 birth survey (for details of these surveys see (1)). The subjects of mental health and  
49  
50 165 lifestyle survey was included in the present study. Briefly, the target population, consists  
51  
52 166 of 210,189 officially registered victims of the Great East Japan Earthquake from the  
53  
54 167 evacuation zones Hirono Town, Naraha Town, Tomioka Town, Kawauchi Village,  
55  
56  
57  
58  
59  
60



1  
2  
3  
4  
5  
6 168 Futaba Town, Namie Town, Katsurao Village, Minamisoma City, Tamura City,  
7  
8 169 Yamakiya District of Kawamata Town, and Iitate Village. In 2012, 180,604  
9  
10 170 questionnaires were sent out with 73,569 questionnaires returned with responses, i.e. a  
11  
12 171 response rate of 40.7%. Among the responders, 136 were excluded due to blank or  
13  
14 172 duplicated questionnaires and 9,245 for questionnaires filled in by a proxy. After  
15  
16 173 exclusion, the data of 73,433 subjects (32,301 men and 41,132 women) were used in  
17  
18 174 our analyses.

19  
20  
21 175 The study protocol was approved by the Ethics Committee of Fukushima Medical  
22  
23 176 University. Participants who returned the self-administered questionnaires were  
24  
25 177 considered to have consented to participate.  
26  
27  
28

#### 29 179 **Data collection and measurement**

30  
31  
32 180 A questionnaire was used to broadly investigate the health status and lifestyle of  
33  
34 181 the refugees. The exacerbation of headache, dizziness, palpitations, and shortness of  
35  
36 182 breath was determined based on self-reports in the questionnaire. All subjects were  
37  
38 183 asked to answer the question 'Do you have the following perceived symptoms after the  
39  
40 184 earthquake?' and could choose between the replies 'No', 'Yes', and 'Exacerbation'. In  
41  
42 185 the present study we focused on reports of 'exacerbation'.  
43  
44

45 186 To evaluate Posttraumatic Stress Disorder (PTSD) symptoms we used the  
46  
47 187 non-military version of the Posttraumatic Stress Disorder Checklist (PCL-S) (15). This is  
48  
49 188 a 17-item self-report checklist based on the Diagnostic and Statistical Manual of Mental  
50  
51 189 Disorders (4th edition, DSM-IV) criteria (16), with each item rated using a Likert-type  
52  
53 190 scale from one ('not at all') to five ('extremely'). Respondents were requested to  
54  
55  
56 191 respond to questions about each PTSD symptom separately and report whether they  
57  
58  
59  
60

1  
2  
3  
4  
5  
6 192 had experienced a given symptom during the past month. Based on summing the  
7  
8 193 scores from each of the 17 items, a total PCL-S score can range from 17 to 85 (15).  
9

10 194 In addition to the PCL-S checklist, the following items were included in the  
11  
12 195 self-assessment and self-report questionnaires:  
13

14 196 1. Demographic characteristics  
15

16 197 Demographic subject characteristics include gender, age group, mental health  
17  
18 198 status, history of mental illness, incidence of PTSD symptoms, smoking and drinking  
19  
20 199 habits, and current physical activity levels. Age groups were divided into childbearing  
21  
22 200 age (20–49 years), middle age (50–64 years), and old age (65 years and above).  
23  
24

25 201 Mental health status, and specifically incidence and severity of depression, was  
26  
27 202 measured by the Japanese version of the K6 Kessler Psychological Distress Scale,  
28  
29 203 which has been validated by previous studies (17, 18). In the K6 assessment,  
30  
31 204 participants were asked if they had experienced any of the following six symptoms  
32  
33 205 during the past 30 days: feeling so depressed that nothing could cheer them up, feeling  
34  
35 206 that everything was an effort, or feeling nervous, hopeless, restless, fidgety, or  
36  
37 207 worthless. Each question was rated on a 5-point Likert-type scale from zero (none of the  
38  
39 208 time) to four (all of the time), with higher scores signifying worse mental health status  
40  
41 209 (total range: 0–24) (15). In addition, we assessed participant's history of mental illness  
42  
43 210 by self-report as 'yes' or 'no'.  
44  
45

46 211 We obtained data on smoking and drinking habits using the following metrics,  
47  
48 212 respectively: 'non-smoker', 'ex-smoker', or 'current smoker'; and 'once or more per  
49  
50 213 month', 'less than once per month', or 'ex- drinker'. Participants had four options to  
51  
52 214 assess current physical activity level: 'every day', '2-4 times/week', 'once a week', or  
53  
54 215 'nearly none'.  
55  
56  
57  
58  
59  
60

1  
2  
3  
4  
5  
6 216 2. Socioeconomic variables

7  
8 217 Participants were required to select from six options regarding their living  
9  
10 218 arrangements: evacuation shelter, temporary housing, rental housing or apartment, a  
11  
12 219 relative's home, their own home, and other. The last option was considered  
13  
14 220 non-informative due to its ambiguity and thus excluded from analysis.  
15

16  
17 221 Other socioeconomic variables included educational years (< 12 years, >=12 years),  
18  
19 222 change in employment status and change in income. By answering 'Yes' to either  
20  
21 223 question, the participant indicated he/she became unemployed or experienced  
22  
23 224 decreased income since the disaster.

24  
25 225 3. Disaster-related variables

26  
27 226 Disaster-related variables included experience of the tsunami (yes or no), experience  
28  
29 227 of the nuclear power plant accident (defined as hearing the explosion; yes or no), losing  
30  
31 228 someone close because of the disaster (yes or no), and damage to accommodation (no,  
32  
33 229 partial damage, half of accommodation destroyed, more than a half destroyed, total  
34  
35 230 destruction).  
36  
37  
38  
39

40 232 **Statistical analysis**

41  
42 233 The incidence of exacerbation of headache, dizziness, palpitations, and shortness of  
43  
44 234 breath was compared between subjects with different demographic, socioeconomic,  
45  
46 235 and disaster-related characteristics using chi-square tests. For the analyses  
47  
48 236 investigating PTSD incidence, a PCL-S cut-off score of 50 was used, according to  
49  
50 237 Weathers et al (19). Subjects who received a PCL-S of 50 or greater were allocated to  
51  
52 238 the 'high-scoring group' and compared to the low-scoring (PCL-S < 50) group using  
53  
54 239 chi-square tests.  
55  
56  
57  
58  
59  
60

1  
2  
3  
4  
5  
6 240 Odds ratios (ORs) and 95% confidence intervals (CIs) of each socioeconomic  
7  
8 241 determinant (living arrangement, unemployment, decreased income and educational  
9  
10 242 years were estimated by applying multiple logistic regression models. Adjustment  
11  
12 243 variables consisted of sex (male, female), age (20–49, 50–64, ≥65 years), drinking  
13  
14 244 status (once or more per month, ex-drinker, less than once per month), smoking status  
15  
16 245 (non-smoker, ex-smoker, current smoker), mental health distress (K6<3, K6≥13),  
17  
18 246 hypertension history (yes or no), stroke history (yes or no), heart disease history (yes or  
19  
20 247 no), physical activities (≥ once per day, 2–4 times per week, once per week, never),  
21  
22 248 tsunami experience (yes or no), radiation experience (yes or no), damage of  
23  
24 249 accommodation (no, partial, half, more than a half, total), loss of family member (yes or  
25  
26 250 no).

27  
28  
29 251 We conducted the above analyses both for separate and combined sexes. All  
30  
31 252 analyses were conducted using SAS software version 9.4 (SAS Institute Inc., Cary, NC,  
32  
33 253 USA).

34  
35  
36 254

## 37 38 255 **Results**

39  
40 256 As shown in the tables, 1,893 (2.6%) individuals reported exacerbation of headaches,  
41  
42 257 1,229 (1.7%) of dizziness, 1,085 (1.5%) of palpitations, and 626 (0.9%) exacerbation of  
43  
44 258 shortness of breath.

## 45 46 47 259 **Demographic characteristics**

48  
49 260 Table 1 summarizes the demographic characteristics of the subjects. Exacerbation of  
50  
51 261 the above cardiovascular symptoms was significantly more likely to happen in women  
52  
53 262 than in men (3.5% vs. 1.4% for headaches; 2.2% vs. 1.1% for dizziness; 2.0% vs. 0.9%  
54  
55 263 for palpitations; 0.9% vs. 0.8% for shortness of breath). Subjects experiencing  
56  
57  
58  
59  
60

1  
2  
3  
4  
5  
6 264 exacerbation of headaches, dizziness, or palpitations were more likely to be young (20–  
7  
8 265 49 years), while those experiencing exacerbation of shortness of breath were more  
9  
10 266 likely to be 50-64 years. Subjects experiencing exacerbation of cardiovascular  
11  
12 267 symptoms were also more likely to suffer from depression ( $K6 \geq 13$ ) and Posttraumatic  
13  
14 268 Stress Disorder ( $PCL \geq 50$ ), and to commonly have a history of hypertension, stroke, or  
15  
16 269 heart disease. Non-smokers and non-drinkers were no less likely than (ex-) smokers or  
17  
18 270 (ex-) drinkers to experience exacerbation of cardiovascular symptoms. However,  
19  
20 271 symptom exacerbation was most pronounced in subjects who were physically active  
21  
22 272 less than once a day.

### 273 **Socioeconomic variables**

274 Table 1 also shows refugees living in their own or a relative's home are less likely to  
275 experience exacerbated cardiovascular symptoms. Of the refugees living in their own  
276 home, 1.4% reported exacerbation of headache, 0.9% of dizziness, 1.6% of palpitations  
277 and 1.0% of shortness of breath. The corresponding statistics for refugees living in  
278 temporary housing and rental houses/apartments were 2.8%, 1.9%, 1.3%, and 1.2%  
279 and 3.5%, 2.1%, 1.8%, and 1.0%, respectively.

280 In the group that became unemployed due to the disaster, 4.2% subjects reported  
281 the exacerbation of headache, 2.5% of dizziness, 2.1% of palpitations and 1.1% of  
282 shortness of breath, while the corresponding statistics for the group that did not lose  
283 their jobs after the disaster were 2.2%, 1.5%, 1.4%, and 0.8%. Exacerbation of most  
284 cardiovascular symptoms was higher in subjects whose income decreased due to the  
285 disaster compared to those who maintained income levels (3.6% vs. 2.4% for  
286 exacerbation of headache, 2.0% vs. 1.6% for exacerbation of dizziness, and 1.7% vs.  
287 1.4% for exacerbation of palpitation).

1  
2  
3  
4  
5  
6 288 In addition, exacerbation of most cardiovascular symptoms was higher in subjects  
7  
8 289 who had 12 years education or more compared to those who had less education (2.9%  
9  
10 290 vs. 1.9% for exacerbation of headache, 1.8% vs. 1.4% for exacerbation of dizziness,  
11  
12 291 and 1.6% vs. 1.2% for exacerbation of palpitation).  
13  
14  
15  
16

### 17 293 **Disaster-related variables**

18  
19 294 Subjects that directly experienced the tsunami and the nuclear power plant accident  
20  
21 295 were more likely to experience exacerbated cardiovascular symptoms. Among those  
22  
23 296 experiencing the tsunami, 3.2% reported exacerbation of headache, 2.2% of dizziness,  
24  
25 297 1.7% of palpitations, and 1.7% of shortness of breath, compared to 2.4%, 1.6%, 1.5%,  
26  
27 298 and 0.8%, respectively, of subjects with no experience of the tsunami. The  
28  
29 299 corresponding statistics for subjects that had heard the nuclear power plant accident  
30  
31 300 were 3.1%, 2.1%, 1.9%, and 1.1% compared to 2.1%, 1.2%, 1.0%, and 0.6%, that had  
32  
33 301 not.  
34  
35

### 36 302 **Multiple Logistic Regression analyses**

37  
38 303 Table 2 summarizes the odds ratios (ORs) and 95% CIs of each socioeconomic  
39  
40 304 determinant for exacerbation of headache, dizziness, palpitations, and shortness of  
41  
42 305 breath. Living arrangement emerged as a risk factor for exacerbated cardiovascular  
43  
44 306 symptoms from our models, which were adjusted for multiple demographic-, health-,  
45  
46 307 and disaster-related variables. Compared to participants living in their own home (OR =  
47  
48 308 1), those living in relatives' homes had higher odds to experience exacerbation of  
49  
50 309 headache (1.58; 95% CI 1.19–2.09) and dizziness (1.42; 95% CI 1.02–1.98). Similarly,  
51  
52 310 subjects living in rental houses or apartments had higher odds of exacerbated  
53  
54 311 headache (1.54; 95% CI 1.32–1.80), dizziness (1.45; 95% CI 1.20–1.75), palpitations  
55  
56  
57  
58  
59  
60

1  
2  
3  
4  
5  
6 312 (1.25; 95% CI 1.03–1.51), and shortness of breath (1.76; 95% CI 1.35–2.28).  
7  
8 313 Participants living in evacuation shelters had increased odds of exacerbation of  
9  
10 314 headache (1.80; 95% CI 1.09–2.96) and refugees living in temporary housing similarly  
11  
12 315 had increased odds of exacerbation of headache (1.42; 95% CI 1.15–1.72), dizziness  
13  
14 316 (1.40; 95% CI 1.09–1.79), and shortness of breath (1.49; 95% CI 1.07–2.08).

15  
16  
17 317 Loss of employment also emerged as a risk factor for increased odds of  
18  
19 318 cardiovascular symptoms. Compared to the evacuees that remained employed (OR =  
20  
21 319 1), subjects that had become unemployed were at higher risk of experiencing  
22  
23 320 exacerbation of headache (1.28; 95% CI 1.12–1.46), dizziness (1.26; 95% CI 1.07–  
24  
25 321 1.48), and palpitation (1.21; 95% 1.01–1.45). In an unadjusted model, we found a  
26  
27 322 significant positive association between unemployment and exacerbation of  
28  
29 323 palpitations; however, after adjusting for multiple relevant variables, this association  
30  
31 324 became non-significant.

32  
33  
34 325 There was no association between decreased income and exacerbated  
35  
36 326 cardiovascular symptoms, except for headache. Here, adjusting for multiple variables  
37  
38 327 resulted in an increased odds ratio for exacerbation of headaches both in an analysis  
39  
40 328 combining both sexes (1.39, 95% CI 1.22–1.60) and in separate analyses of men and  
41  
42 329 women.

43  
44  
45 330 Educational years was not associated with and exacerbated cardiovascular  
46  
47 331 symptoms in multiple-adjusted models in the present study.

48  
49 332

## 50 51 333 **Discussion**

52  
53 334 We have demonstrated a decrease in socioeconomic status due to the earthquake  
54  
55 335 was associated with exacerbated cardiovascular symptoms among evacuees of the  
56  
57  
58  
59  
60

1  
2  
3  
4  
5  
6 336 Great East Japan Earthquake. Compared with participants living in their own home,  
7  
8 337 people of both genders living in relatives' homes, evacuation shelters, temporary  
9  
10 338 housing, or rental houses or apartments were more likely to experience exacerbated  
11  
12 339 headache, dizziness, palpitations, or shortness of breath. Similarly, loss of employment  
13  
14 340 and reduced income due to the disaster increased the risk of exacerbated symptoms.

15  
16  
17 341 The following three points should be considered in the context of our results. Firstly,  
18  
19 342 earthquakes are definitely associated with increased cardiovascular disease, including  
20  
21 343 sudden cardiac death and acute myocardial infarction (2-14), which provides some  
22  
23 344 support for the present study. The Hanshin-Awaji earthquake was associated with an  
24  
25 345 increased cardiovascular disease and the increase persisted for more than a month. In  
26  
27 346 addition, an increase in the number of subjects with acute myocardial infarction,  
28  
29 347 especially in women, was particularly evident during the first 4 weeks post-disaster (9).  
30  
31 348 After the Great East Japan Earthquake, the incidence of reported cardioembolic stroke  
32  
33 349 increased in the first 3–9 months following the disaster (10), as did the incidence of  
34  
35 350 other cardiovascular diseases (11-14). Our study contributes to the reported incidences  
36  
37 351 of cardiovascular disease by demonstrating exacerbated cardiovascular symptoms  
38  
39 352 among evacuees after a disaster from self-report questionnaires rather than from death  
40  
41 353 certificates.

42  
43  
44 354 Secondly, increases in cardiovascular events and exacerbated cardiovascular  
45  
46 355 symptoms can be attributed to post-disaster distress or mental problems. A review  
47  
48 356 suggests that extremely stressful experiences, such as earthquakes, can trigger  
49  
50 357 cardiovascular events (20-22). Acute major stress and chronic stress, i.e. the  
51  
52 358 cumulative load of minor daily stress, can have both long-term consequences, which  
53  
54  
55 359 can be perceived as stressful and a potential threat to one's environment, subsequently



1  
2  
3  
4  
5  
6 360 inducing a variety of negative emotional responses, such as fear, anxiety, sadness,  
7  
8 361 anger, hostility, and depression (4,23) leading to hypertension or cardiovascular events  
9  
10 362 (20-22). In the current study, all subjects exhibiting exacerbated cardiovascular  
11  
12 363 symptoms were more likely to have depression ( $K6 \geq 13$ ) or Posttraumatic Stress  
13  
14 364 Disorder ( $PCL \geq 50$ ). Logistic regression analyses also showed that depression and  
15  
16 365 Posttraumatic Stress Disorder were both independently associated with exacerbated  
17  
18 366 cardiovascular symptoms (data not shown).

20  
21 367 Thirdly, although post-disaster increases in cardiovascular events were widely  
22  
23 368 reported in previous studies, the investigation of socioeconomic determinants of these  
24  
25 369 events during the evacuation term of refugees was very limited. Previous studies  
26  
27 370 reported that one year after the Wenchuan Earthquake in China, depression severity  
28  
29 371 among refugees varied with income, housing status, and social support (24), indicating  
30  
31 372 that earthquake impact on income was indirectly associated with life satisfaction and  
32  
33 373 depression via its effect on financial status (25). Another study showed that six months  
34  
35 374 after the 2011 Christchurch earthquake in New Zealand, on average lower income per  
36  
37 375 home contributed unequivocally to earthquake-related distress and dysfunction (26).

38  
39  
40 376 In the present study, not living in the own home but living in evacuation shelters or  
41  
42 377 temporary housing, was associated with exacerbation of all examined cardiovascular  
43  
44 378 symptoms, which was more robust in women than in men. Evacuation shelters and  
45  
46 379 temporary housing were less spacious, damper, and less comfortable than the refugees'  
47  
48 380 homes. Due to insufficient access to supermarkets or shortages of cooking equipment  
49  
50 381 and utilities, such as gas, evacuees living in shelters would struggle to access balanced  
51  
52 382 meals. A recent cross-sectional study showed a well-balanced diet was associated with  
53  
54 383 better living conditions among refugees after the Great East Japan Earthquake,  
55  
56  
57  
58  
59  
60

1  
2  
3  
4  
5  
6 384 whereas imbalanced diets, particularly with regard to meat content, were not (27). In  
7  
8 385 addition, having to take refuge in accommodation other than the own home meant that  
9  
10 386 the own neighborhood had been damaged by the disaster, which may lead to shortness  
11  
12 387 of social support. In addition, among the refugees. All of the above factors can be  
13  
14 388 considered predictors of stress among refugees, where women may be more likely to  
15  
16 389 be influenced than men.

17  
18  
19 390 Unemployment and decreased income due to the disaster were also associated with  
20  
21 391 exacerbation of some cardiovascular symptoms. These results were expected as poor  
22  
23 392 economic circumstances are expected to exacerbate depression. Low income may be  
24  
25 393 considered a chronic stressor, increasing psychological distress as a result of limited  
26  
27 394 resource access and opportunities for resource accumulation (26). Previous studies  
28  
29 395 also showed that, following an earthquake, living in a low-income area may contribute to  
30  
31 396 greater psychological distress due to lack of occupational, social, and financial  
32  
33 397 resources. A community study showed that, after the Christchurch earthquake, low  
34  
35 398 household income contributed strongly to earthquake-related distress (26). In the  
36  
37 399 present study, we found a significant association between disaster-related  
38  
39 400 unemployment and exacerbation of some cardiovascular symptoms, but the  
40  
41 401 subsistence allowance provided to refugees by the Japanese government may have  
42  
43 402 reduced effect size by reducing the impact of lowered economic circumstances on  
44  
45 403 refugees.

46  
47  
48  
49 404 Educational level was inversely associated with cardiovascular disease risk in present  
50  
51 405 studies (27, 28). However, in present study, educational years was not associated with  
52  
53 406 exacerbated cardiovascular symptoms. It may due to the post-disaster conditions. In the  
54  
55 407 present study, both earthquake, tsunami and nuclear accident related factors and  
56  
57  
58  
59  
60

1  
2  
3  
4  
5  
6 408 unemployment or decreased income due to the disasters had a large influence on the  
7  
8 409 exacerbated cardiovascular symptoms of the subjects, which may weaken the impact  
9  
10 410 from the educational levels.

11 Our understanding of disaster-related stress on cardiovascular disease remains  
12 incomplete. A clinical study on the 1995 Hanshin-Awaji earthquake comparing pre- and  
13  
14 412 post- BP levels in well-controlled hypertension patients showed an increase of 18mmHg  
15  
16 413 in diastolic blood pressure two weeks after the earthquake (29). Although white-coat  
17  
18 414 hypertension contributed partly to the results, whereby patients exhibit increased blood  
19  
20 415 pressure in clinical settings, some patients developed sustained hypertension that  
21  
22 416 persisted for one year after the earthquake (29). One study found increased levels of  
23  
24 417 cholesterol and triglycerides a few weeks after an earthquake (3), whereas other studies  
25  
26 418 failed to show significantly higher total cholesterol or HDL-cholesterol during the first two  
27  
28 419 weeks after the Hanshin-Awaji earthquake (6). Therefore, the extent to which changes  
29  
30 420 in blood lipid profile contributes to exacerbated cardiovascular symptoms several  
31  
32 421 months after the Great East Japan Earthquake remains undetermined. Chronic  
33  
34 422 psychological stress is also associated with increased insulin resistance (4). A recent  
35  
36 423 study after the Great East Japan Earthquake found the negative effects of the disaster  
37  
38 424 on metabolic factors were greater among evacuees than non-evacuees (30), which may  
39  
40 425 contribute to exacerbated cardiovascular symptoms among evacuees.  
41  
42 426

43  
44  
45  
46  
47 The large scale of assessment and assessment under post-disaster  
48  
49 428 conditions provide considerable authority for the present study. In addition, our study is  
50  
51 429 the first to identify an inverse relationship between low socioeconomic status  
52  
53 430 and exacerbated cardiovascular symptoms from an evacuee self-report after a disaster;  
54  
55 431 our results will be useful for generating guidelines for evacuee health. However, the  
56  
57  
58  
59  
60

1  
2  
3  
4  
5  
6 432 following study limitations should be considered: Firstly, The study was based on a  
7  
8 433 subjectivity of self-response survey. Further information, such as the incidence of  
9  
10 434 cardiovascular disease should be captured. However, though the above-mentioned  
11  
12 435 symptoms would not be logical predict cardiovascular diseases, several previous  
13  
14 436 studies showed headache was suggestive of an incremental risk for stroke (31, 32), and  
15  
16 437 other studies also showed that vertigo or dizziness, chest pain was associated with  
17  
18 438 cardiovascular problems (33, 34). Therefore, our study of the 4 symptoms may be  
19  
20 439 helpful for improvement of evacuees' health to some extent. Secondly, not only the  
21  
22 440 Great East Japan Earthquake but also the accompanied nuclear accident had a large  
23  
24 441 psychological impact on the evacuees, thus the present study may cannot be  
25  
26 442 unconditionally compared with other studies due to the special situation. Thirdly, the  
27  
28 443 overall response rate was low (40.7%) and data may have contained sampling biases.  
29  
30 444 Thirdly, under the extraordinary and unusual social circumstances that follow a major  
31  
32 445 disaster, health symptoms perceived by evacuees may be strongly influenced by  
33  
34 446 changes in family relationships (e.g., death, physical separation) among the evacuees.  
35  
36 447 However, the present study did not capture these information. Moreover, other  
37  
38 448 socioeconomic determinants, such as household income, and other cardiovascular risk  
39  
40 449 factors, such as blood pressure, cholesterol levels, were not captured in the present  
41  
42 450 study either. In addition, although most questionnaires were collected in the same  
43  
44 451 period (from Jan 2012 to Mar 2012), it is possible the timing of the survey affected the  
45  
46 452 perceived cardiovascular symptoms. Finally, other environmental factors, such as  
47  
48 453 temperature, food supplies, medical facilities may also affect cardiovascular problems  
49  
50 454 (35, 36). These information were not collected in the present study. The potential  
51  
52 455 associations observed in this study will be investigated over an extended period.  
53  
54  
55  
56  
57  
58  
59  
60

1  
2  
3  
4  
5  
6 456 In conclusion, the present study was the first to identify a relationship between lower  
7  
8 457 socioeconomic status due to the earthquake with exacerbated cardiovascular  
9  
10 458 symptoms among evacuees after the Great East Japan Earthquake. Our findings will  
11  
12 459 inform future periodic health examinations and health guidelines for evacuees.  
13  
14  
15  
16

#### 17 461 **Acknowledgements**

18  
19 462 This Survey was conducted as part of Fukushima Prefecture's post-disaster recovery  
20  
21 463 plans and supported by the national 'Health Fund for Children and Adults Affected by the  
22  
23 464 Nuclear Incident.'  
24

25 465

#### 27 466 **Contributors**

28  
29 467 WZ and TO designed the study. TO, SY, MM, MH, NH, YS, HY, MH, HT and AO were  
30  
31 468 responsible for the data collection and overseeing study procedures. The analyses was  
32  
33 469 conducted by WZ and TO. The manuscript was made by WZ. All the authors did contribution  
34  
35 470 to the revision of the manuscript. All the authors read and approved the final version of the  
36  
37 471 manuscript.  
38  
39

40 472

#### 42 473 **Funding**

43  
44 474 This survey was conducted as part of Fukushima Prefecture's post-disaster recovery plans  
45  
46 475 and was supported by the national 'Health Fund for Children and Adults Affected by the  
47  
48 476 Nuclear Incident'.  
49

50 477

#### 52 478 **Declaration of interests**

53  
54  
55 479 We declare that we have no competing interests.  
56  
57  
58  
59  
60

1  
2  
3  
4  
5  
6 480

7  
8 481 **Patient consent**

9  
10 482 Obtained.

11  
12 483

13  
14 484 **Data sharing statement**

15  
16 485 No additional data are available.

17  
18 486

19  
20 487

21  
22 488

23  
24 489

25  
26 490

27  
28 491

29  
30 492

31  
32 493

33  
34 494

35  
36 495

37  
38 496

39  
40 497

41  
42 498

43  
44 499

45  
46 500

47  
48 501

49  
50 502 **References**

51  
52

53  
54

55  
56

57  
58

59  
60

- 1  
2  
3  
4  
5  
6 503 1. Yasumura S, Hosoya M, Yamashita S, Kamiya K, Abe M, Akashi M, Kodama K,  
7  
8 504 Ozasa K; Fukushima Health Management Survey Group. Study protocol for the  
9  
10 505 Fukushima Health Management Survey. *J Epidemiol.* 2012; 22: 375-383.  
11  
12  
13 506 2. Nozaki E, Nakamura A, Abe A, Kagaya Y, Kohzu K, Sato K, Nakajima S, Fukui S,  
14  
15 507 Endo H, Takahashi T, Seki H, Tamaki K, Mochizuki I. Occurrence of cardiovascular  
16  
17 508 events after 2011 Great East Japan Earthquake and tsunami disaster. *Int Heart J.*  
18  
19 509 2013; 54: 247-253.  
20  
21  
22  
23 510 3. Trevisan M, Celentano E, Meucci C, Farinaro E, Jossa F, Krogh V, Giumetti D,  
24  
25 511 Panico S, Scottoni A, Mancini M. Short-term effect of natural disasters on coronary  
26  
27 512 heart disease risk factors. *Arteriosclerosis.* 1986; 6: 491-494.  
28  
29  
30 513 4. Kario K, McEwen BS, Pickering TG. Disasters and the heart: a review of the effects of  
31  
32 514 earthquake-induced stress on cardiovascular disease. *Hypertens Res.* 2003;  
33  
34 515 26:355-367.  
35  
36  
37 516 5. Kario K, Matsuo T, Kayaba K, Soukejima S, Kagamimori S, Shimada K.  
38  
39 517 Earthquake-induced cardiovascular disease and related risk factors in focusing on  
40  
41 518 the Great Hanshin-Awaji Earthquake. *J Epidemiol.* 1998; 8:131-139.  
42  
43  
44 519 6. Kario K, Matsuo T. Increased incidence of cardiovascular attacks in the epicenter just  
45  
46 520 after the Hanshin-Awaji earthquake. *Thromb Haemost.* 1995; 74: 1207.  
47  
48  
49 521 7. Kario K, Matsuo T, Kobayashi H, Yamamoto K, Shimada K. Earthquake-induced  
50  
51 522 potentiation of acute risk factors in hypertensive elderly patients: possible triggering  
52  
53 523 of cardiovascular events after a major earthquake. *J Am Coll Cardiol.* 1997; 29:  
54  
55 524 926-933.  
56  
57  
58  
59  
60

- 1  
2  
3  
4  
5  
6 525 8. Kario K, Matsuo T, Shimada K, Pickering TG. Factors associated with the occurrence  
7  
8 526 and magnitude of earthquake-induced increases in blood pressure. *Am J Med.*  
9  
10 527 2001; 111: 379-384.
- 11  
12 528 9. Suzuki S, Sakamoto S, Miki T, Matsuo T. Hanshin-Awaji earthquake and acute  
13  
14 529 myocardial infarction [letter]. *Lancet.* 1995; 345: 981.
- 15  
16  
17 530 10. Itabashi R, Furui E, Sato S, Yazawa Y, Kawata K, Mori E. Incidence of cardioembolic  
18  
19 531 stroke including paradoxical brain embolism in patients with acute ischemic stroke  
20  
21 532 before and after the Great East Japan Earthquake. 2014; 37:431-437.
- 22  
23  
24 533 11 Suzuki H, Ohira T, Takeishi Y, Hosoya M, Yasumura S, Satoh H, Kawasaki  
25  
26 534 Y4, Takahashi A, Sakai A, Ohtsuru A, Kobashi G, Ozasa K, Yamashita S, Kamiya K,  
27  
28 535 Abe M; Fukushima Health Management Survey Group. Increased prevalence of  
29  
30 536 atrial fibrillation after the Great East Japan Earthquake: Results from the Fukushima  
31  
32 537 Health Management Survey. *Int J Cardiol.* 2015; 198: 102-105.
- 33  
34  
35 538 12. Aoki T, Takahashi J, Fukumoto Y, Yasuda S, Ito K, Miyata S, Shinozaki T, Inoue K, Yagi  
36  
37 539 T, Komaru T, Katahira Y, Obata A, Hiramoto T, Sukegawa H, Ogata K, Shimokawa H.  
38  
39 540 Effect of the Great East Japan earthquake on Cardiovascular Diseases. *Circ J.*  
40  
41 541 2013; 77: 490-493.
- 42  
43  
44 542 13. Aoki T, Fukumoto Y, Yasuda S, Sakata Y, Ito K, Takahashi J, Miyata S, Tsuji I,  
45  
46 543 Shimokawa H. The Great East Japan Earthquake Disaster and cardiovascular  
47  
48 544 diseases. *Eur Heart J.* 2012; 33:2796-2803.
- 49  
50  
51 545 14. Yamauchi H, Yoshihisa A, Iwaya S, Owada T, Sato T, Suzuki S, Yamaki T, Sugimoto  
52  
53 546 K, Kunii H, Nakazato K, Suzuki H, Saitoh S, Takeishi Y. Clinical Features of Patients



- 1  
2  
3  
4  
5  
6 547 With Decompensated Heart Failure After the Great East Japan Earthquake. *Am J*  
7  
8 548 *Cardiol.* 2013; 112: 94-99.  
9  
10 549 15. Yabe H, Suzuki Y, Mashiko H, Nakayama Y, Hisata M, Niwa S, Yasumura S,  
11  
12 550 Yamashita S, Kamiya K, Abe M. Psychological distress after the great East Japan  
13  
14 551 earthquake and fukushima daiichi nuclear power plant accident: results of a mental  
15  
16 552 health and lifestyle survey through the fukushima health management survey in  
17  
18 553 fy2011 and fy2012. *Fukushima J Med Sci.* 2014; 60:57-67.  
19  
20  
21 554 16. Blanchard EB, Jones-Alexander J, Buckley TC, Forneris CA. Psychometric  
22  
23 555 properties of the PTSD Checklist (PCL). *Behav Res Ther.* 1996; 34: 669-673.  
24  
25  
26 556 17. Furukawa TA, Kessler RC, Slade T, Andrews G. The performance of the K6 and  
27  
28 557 K10 screening scales for psychological distress in the Australian National Survey of  
29  
30 558 Mental Health and Well-Being. *Psychol Med.* 2003; 33:357-362.  
31  
32  
33 559 18. Sakurai K, Nishi A, Kondo K, Yanagida K, Kawakami N. Screening performance of  
34  
35 560 K6/K10 and other screening instruments for mood and anxiety disorders in Japan.  
36  
37 561 *Psychiatry Clin Neurosci.* 2011; 65:434-441.  
38  
39  
40 562 19. Weathers FW, Litz BT, Herman DS, Huska JA, Keane TM. The PTSD checklist  
41  
42 563 (OCL): Reliability, Validity, and Diagnostic Utility. Paper presented at the Annual  
43  
44 564 Meeting of the International Society for Traumatic Stress Studies, San Antonio, TX.  
45  
46 565 1993.  
47  
48  
49 566 20 Pickering TG. Mental stress as a causal factor in the development of hypertension  
50  
51 567 and cardiovascular disease. *Curr Hypertens Rep.* 2001; 3: 249-254.  
52  
53  
54 568 21. Kabutoya T, Kario K. Earthquake and blood pressure. *Hypertens Res.* 2009;  
55  
56 569 32:732-734.  
57  
58  
59  
60

- 1  
2  
3  
4  
5  
6 570 22. Kario K. Disaster hypertension- its characteristics, mechanism, and management.  
7  
8 571 Circ J. 2012; 76: 553-552.  
9  
10 572 23. Yokoyama Y, Otsuka K, Kawakami N, Kobayashi S, Ogawa A, Tanno K, Onoda T,  
11  
12 573 Yaegashi Y, Sakata K. Mental health and related factors after the Great East Japan  
13  
14 574 earthquake and tsunami. PLoS One. 2014; 9: e102497.  
15  
16  
17 575 24. Xu J, Mo L, Xu Z. A cross-sectional study on risk factors of depression severity  
18  
19 576 among survivors of the 2008 Sichuan earthquake. Community Ment Health J. 2013;  
20  
21 577 49: 847-856.  
22  
23  
24 578 25. Huang Y, Wong H, Tan HT. Associations between economic loss, financial strain  
25  
26 579 and the psychological status of Wenchuan earthquake survivors. Disasters. 2015;  
27  
28 580 39:795-810.  
29  
30  
31 581 26. Dorahy MJ, Rowlands A, Renouf C, Hanna D, Britt E, Carter JD. Impact of average  
32  
33 582 household income and damage exposure on post-earthquake distress and  
34  
35 583 functioning: A community study following the February 2011 Christchurch  
36  
37 584 earthquake. Br J Psychol. 2015; 106: 526-543.  
38  
39  
40 585 27. Shea S, Lima J, Diez-Roux A, Jorgensen NW, McClelland RL Socioeconomic  
41  
42 586 Status and Poor Health Outcome at 10 Years of Follow-Up in the Multi-Ethnic Study  
43  
44 587 of Atherosclerosis. PLoS One. 2016; 11  
45  
46  
47 588 28. Veronesi G, Tunstall-Pedoe H, Ferrario MM, Kee F, Kuulasmaa K, Chambless  
48  
49 589 LE6, Amouyel P, Arveiler D, Bobak M, Ferrieres J, Giampaoli S, Jørgensen  
50  
51 590 T, Peters A, Salomaa V, Soderberg S, Tamosiunas A, Cesana G; MORGAM Project.  
52  
53 591 Combined effect of educational status and cardiovascular risk factors on the  
54  
55 592 incidence of coronary heart disease and stroke in European cohorts: Implications for  
56  
57  
58  
59  
60

- 1  
2  
3  
4  
5  
6 593 prevention. *Eur J Prev Cardiol*. 2016 Nov 11. pii: 2047487316679521. [Epub ahead  
7  
8 594 of print]  
9  
10 595 29 Kario K, Matsuo T, Ishida T, Shimada K. 'White coat' hypertension and the  
11  
12 596 Hanshin-Awaji Earthquake. *Lancet*. 1995; 345: 1346.  
13  
14  
15 597 30. Satoh H, Ohira T, Hosoya M, Sakai A, Watanabe T, Ohtsuru A et al. Evacuation  
16  
17 598 after the Fukushima Daiichi Nuclear Power Plant Accident Is a Cause of Diabetes:  
18  
19 599 Results from the Fukushima Health Management Survey. *J Diabetes Res*. 2015.  
20  
21  
22 600 31. Tsai CL, Chou CH, Lee PJ, Yin JH, Chen SY, Lin CC, Sung YF, Yang FC, Chung  
23  
24 601 CH, Chien WC, Tsai CK, Lee JT. The potential impact of primary headache  
25  
26 602 disorders on stroke risk. *J Headache Pain*. 2016; 17: 108.  
27  
28  
29 603 32. Hu X, Zhou Y, Zhao H, Peng C. Migraine and the risk of stroke: an updated  
30  
31 604 meta-analysis of prospective cohort studies. *Neurol Sci*. 2016 Oct 26. [Epub ahead  
32  
33 605 of print]  
34  
35  
36 606 33. Doijiri R, Uno H, Miyashita K, Ihara M , Nagatsuka K. How Commonly Is Stroke  
37  
38 607 Found in Patients with Isolated Vertigo or Dizziness Attack? *J Stroke Cerebrovasc*  
39  
40 608 *Dis*. 2016; 25: 2549-2552.  
41  
42  
43 609 34. Haasenritter J, Stanze D, Widera G, Wilimzig C, Abu Hani M, Sonnichsen AC, Bosner  
44  
45 610 S, Rochon J, Donner-Banzhoff N. Does the patient with chest pain have a coronary  
46  
47 611 heart disease? Diagnostic value of single symptoms and signs--a meta-analysis.  
48  
49 612 *Croat Med J*. 2012; 53:432-441.  
50  
51  
52 613 35. Sun Z. Cardiovascular responses to cold exposure. *Front Biosci (Elite Ed)*. 2010; 2:  
53  
54 614 495-503.  
55  
56  
57  
58  
59  
60

1  
2  
3  
4  
5  
6 615 36. Nakamura M, Tanaka F, Nakajima S, Honma M, Sakai T, Kawakami M, Endo H,  
7  
8 616 Onodera M, Niiyama M, Komatsu T, Sakamaki K, Onoda T, Sakata K, Morino Y,  
9  
10 617 Takahashi T, Makita S. Comparison of the incidence of acute decompensated heart  
11  
12 618 failure before and after the major tsunami in Northeast Japan. Am J Cardiol. 2012;  
13  
14 619 110:1856-1860.

16 620

19 621

22 622

25 623

28 624

31 625

34 626

37 627

40 628

43 629

630 Table 1. Characteristics of survey participants and correlated incidence of exacerbation of cardiovascular related symptoms.

631

632

633

|                                       | Exacerbation of<br>headache | Exacerbation of<br>dizziness | Exacerbation of<br>palpitation | Exacerbation of<br>shortness of breath |
|---------------------------------------|-----------------------------|------------------------------|--------------------------------|----------------------------------------|
|                                       | No. (%)                     | No. (%)                      | No. (%)                        | No. (%)                                |
| <b>Sex</b>                            |                             |                              |                                |                                        |
| Men                                   | 466 (1.4)                   | 341 (1.1)                    | 277 (0.9)                      | 257 (0.8)                              |
| Women                                 | 1,427 (3.5)                 | 888 (2.2)                    | 808 (2.0)                      | 369 (0.9)                              |
| <b>Age</b>                            |                             |                              |                                |                                        |
| 20-49                                 | 966 (3.9)                   | 507 (2.0)                    | 407 (1.6)                      | 147 (0.6)                              |
| 50-64                                 | 514 (2.4)                   | 302 (1.4)                    | 323 (1.5)                      | 159 (0.8)                              |
| >=65                                  | 413 (1.4)                   | 420 (1.6)                    | 355 (1.3)                      | 320 (0.4)                              |
| <b>Mental Health Status</b>           |                             |                              |                                |                                        |
| K6<13                                 | 1,092 (1.7)                 | 695 (1.1)                    | 562 (0.9)                      | 355 (0.6)                              |
| K6>=13                                | 801 (8.9)                   | 534 (5.3)                    | 523 (5.2)                      | 271 (2.7)                              |
| <b>Post Traumatic Stress Disorder</b> |                             |                              |                                |                                        |
| No                                    | 1,062 (1.7)                 | 653 (1.0)                    | 542 (0.9)                      | 323 (0.5)                              |
| Yes                                   | 831 (8.0)                   | 576 (5.5)                    | 543 (5.2)                      | 303 (2.9)                              |
| <b>Smoking Status</b>                 |                             |                              |                                |                                        |
| Never-smoker                          | 1,104 (2.7)                 | 715 (1.8)                    | 653 (1.6)                      | 318 (0.8)                              |
| Ex-smoker                             | 338 (2.1)                   | 226 (1.4)                    | 214 (1.4)                      | 171 (1.1)                              |

|                              |             |             |             |           |
|------------------------------|-------------|-------------|-------------|-----------|
| Current smoker               | 403 (2.8)   | 258 (1.8)   | 196 (1.3)   | 123 (0.8) |
| <b>Drinking Status</b>       |             |             |             |           |
| Never-drinker                | 1,067 (2.9) | 674 (1.8)   | 597 (1.6)   | 323 (0.9) |
| Ex-drinker                   | 80 (2.9)    | 63 (2.3)    | 61 (2.2)    | 41 (1.5)  |
| Current drinker              | 715 (2.3)   | 463 (1.5)   | 407 (1.3)   | 248 (0.8) |
| <b>Physical activity</b>     |             |             |             |           |
| >= once per day              | 179 (1.7)   | 131 (1.2)   | 96 (0.9)    | 69 (0.7)  |
| 2-4 times per week           | 309 (2.2)   | 245 (1.7)   | 195 (1.4)   | 123 (0.9) |
| Once per week                | 234 (2.4)   | 143 (1.4)   | 139 (1.4)   | 97 (1.0)  |
| Never                        | 1144 (3.2)  | 687 (1.9)   | 637 (1.8)   | 325 (0.9) |
| <b>Hypertension History</b>  |             |             |             |           |
| No                           | 1,216 (2.8) | 667 (1.6)   | 584 (1.4)   | 276 (0.6) |
| Yes                          | 677 (2.2)   | 562 (1.8)   | 501 (1.6)   | 350 (1.1) |
| <b>Stroke History</b>        |             |             |             |           |
| No                           | 1,799 (2.6) | 1,146 (1.7) | 1,799 (1.5) | 576 (0.8) |
| Yes                          | 94 (2.4)    | 83 (2.2)    | 94 (1.6)    | 50 (1.3)  |
| <b>Heart Disease History</b> |             |             |             |           |
| No                           | 1,691 (2.6) | 1,025 (1.6) | 1,691 (2.6) | 432 (0.7) |
| Yes                          | 202 (10.7)  | 204 (2.8)   | 202 (4.0)   | 194 (2.7) |
| <b>Unemployment</b>          |             |             |             |           |
| No                           | 1,293 (2.2) | 874 (1.5)   | 790 (1.4)   | 470 (0.8) |
| Yes                          | 600 (4.2)   | 355 (2.5)   | 295 (2.1)   | 156 (1.1) |
| <b>Decreased income</b>      |             |             |             |           |

|                                                       |             |           |           |           |
|-------------------------------------------------------|-------------|-----------|-----------|-----------|
| No                                                    | 1,432 (2.4) | 968 (1.6) | 870 (1.4) | 506 (0.8) |
| Yes                                                   | 461 (3.6)   | 261 (2.0) | 215 (1.7) | 120 (0.9) |
| <b>Living arrangement</b>                             |             |           |           |           |
| Evacuation Shelter Temporary housing                  | 213 (2.5)   | 12 (1.6)  | 5 (0.7)   | 5 (0.7)   |
| Rental house, apartment                               | 195 (2.8)   | 134 (1.9) | 89 (1.3)  | 81 (1.2)  |
| Relatives' home                                       | 796 (3.5)   | 489 (2.1) | 421 (1.8) | 224 (1.0) |
| Own home                                              | 78 (2.8)    | 53 (1.9)  | 209 (1.0) | 108 (0.5) |
|                                                       | 292 (1.4)   | 199 (0.9) | 45 (1.6)  | 29 (1.0)  |
| <b>Tsunami experience</b>                             |             |           |           |           |
| No                                                    | 1,424 (2.4) | 908 (1.6) | 830 (1.4) | 458 (0.8) |
| Yes                                                   | 469 (3.2)   | 321 (2.2) | 255 (1.7) | 168 (1.1) |
| <b>Experience of the nuclear power plant accident</b> |             |           |           |           |
| No                                                    | 717 (2.1)   | 426 (1.2) | 358 (1.0) | 201 (0.6) |
| Yes                                                   | 1,176 (3.1) | 803 (2.1) | 727 (1.9) | 425 (1.1) |
| <b>Damage of house</b>                                |             |           |           |           |
| No                                                    | 413 (2.2)   | 258 (1.4) | 233 (1.3) | 103 (0.6) |
| A part of                                             | 911 (2.4)   | 600 (1.6) | 559 (1.5) | 347 (0.9) |
| Half                                                  | 184 (3.5)   | 129 (2.5) | 83 (1.6)  | 55 (1.1)  |
| More than a half                                      | 67 (3.4)    | 48 (2.5)  | 38 (1.9)  | 23 (1.2)  |
| Totally                                               | 126 (3.3)   | 86 (2.2)  | 66 (1.7)  | 43 (1.1)  |
| <b>Loss of family member</b>                          |             |           |           |           |
| No                                                    | 552 (3.9)   | 363 (2.6) | 296 (2.1) | 199 (1.4) |

1  
2  
3  
4  
5  
6  
7  
8  
9  
10  
11  
12  
13  
14  
15  
16  
17  
18  
19  
20  
21  
22  
23  
24  
25  
26  
27  
28  
29  
30  
31  
32  
33  
34  
35  
36  
37  
38  
39  
40  
41  
42  
43  
44  
45  
46  
47  
48  
49

|     |                          |             |           |           |           |
|-----|--------------------------|-------------|-----------|-----------|-----------|
| 634 | Yes                      | 1,291 (2.3) | 825 (1.5) | 759 (1.3) | 404 (0.7) |
| 635 | <b>Educational years</b> |             |           |           |           |
| 636 | <12 years (reference)    | 352 (1.9)   | 265 (1.4) | 223 (1.2) | 202 (1.1) |
| 637 | >=12 years               | 1,471 (2.9) | 916 (1.8) | 822 (1.6) | 397 (0.8) |
| 638 |                          |             |           |           |           |
| 639 |                          |             |           |           |           |
| 640 |                          |             |           |           |           |

For peer review only



Table 2. Odds ratios (OR) and 95% CIs for cardiovascular related symptoms on multiple logistic regression analyses

|                           |                                 | Exacerbation of Headache |                        |                                |                                  |
|---------------------------|---------------------------------|--------------------------|------------------------|--------------------------------|----------------------------------|
|                           |                                 | OR(95%CI) <sup>a</sup>   | OR(95%CI) <sup>b</sup> | OR(95%CI) for men <sup>b</sup> | OR(95%CI) for women <sup>b</sup> |
| <b>living arrangement</b> | <b>Own home (Reference)</b>     | 1.00(reference)          | 1.00(reference)        | 1.00(reference)                | 1.00(reference)                  |
|                           | Relatives' home                 | 2.03 (1.58-2.62)         | 1.58 (1.19-2.09)       | 1.95 (1.11-2.57)               | 1.46 (1.06-2.02)                 |
|                           | Rental house, apartment         | 2.21 (1.93-2.54)         | 1.54 (1.32-1.80)       | 1.83 (1.34-2.53)               | 1.46 (1.22-1.75)                 |
|                           | Evacuation Shelter              | 2.01 (1.24-3.25)         | 1.80 (1.09-2.96)       | 2.24 (0.99-5.16)               | 1.61 (0.85-3.03)                 |
|                           | Temporary housing               | 2.13 (1.77-2.56)         | 1.42 (1.15-1.72)       | 1.69 (1.11-3.43)               | 1.36 (1.06-1.73)                 |
| <b>Unemployment</b>       | <b>No (reference)</b>           | 1.00(reference)          | 1.00(reference)        | 1.00(reference)                | 1.00(reference)                  |
|                           | Yes                             | 1.70 (1.53-1.88)         | 1.28 (1.12-1.46)       | 1.36 (1.04-1.78)               | 1.26 (1.09-1.47)                 |
| <b>Decreased income</b>   | <b>No (reference)</b>           | 1.00(reference)          | 1.00(reference)        | 1.00(reference)                | 1.00(reference)                  |
|                           | Yes                             | 1.56 (1.40-1.74)         | 1.39 (1.22-1.60)       | 1.39 (1.08-1.78)               | 1.39 (1.17-1.63)                 |
| <b>Educational years</b>  | <b>&lt;12 years (reference)</b> | 1.00(reference)          | 1.00(reference)        | 1.00(reference)                | 1.00(reference)                  |
|                           | >=12 years                      | 1.02 (0.89-1.16)         | 1.04 (0.81-1.63)       | 1.25 (0.91-1.73)               | 0.97 (0.80-1.17)                 |

## Exacerbation of Dizziness

|                           |                                 | OR(95%CI) <sup>a</sup> | OR(95%CI) <sup>b</sup> | OR(95%CI) for men <sup>b</sup> | OR(95%CI) <sup>f</sup> for women <sup>b</sup> |
|---------------------------|---------------------------------|------------------------|------------------------|--------------------------------|-----------------------------------------------|
| <b>living arrangement</b> | <b>Own home (Reference)</b>     | 1.00(reference)        | 1.00(reference)        | 1.00(reference)                | 1.00(reference)                               |
|                           | Relatives' home                 | 1.98 (1.46-2.69)       | 1.42 (1.02-1.98)       | 0.96 (0.49-1.91)               | 1.66 (1.13-2.43)                              |
|                           | Rental house, apartment         | 2.27 (1.91-2.69)       | 1.45 (1.20-1.75)       | 1.28 (0.92-1.79)               | 1.55 (1.23-1.96)                              |
|                           | Evacuation Shelter              | 1.84 (1.02-3.32)       | 1.39 (0.74-2.59)       | 0.85 (0.26-2.77)               | 1.83 (0.87-3.84)                              |
|                           | Temporary housing               | 2.09 (1.68-2.61)       | 1.40 (1.09-1.79)       | 1.51 (1.00-2.28)               | 1.36 (1.00-1.85)                              |
| <b>Unemployment</b>       | <b>No (reference)</b>           | 1.00(reference)        | 1.00(reference)        | 1.00(reference)                | 1.00(reference)                               |
|                           | Yes                             | 1.65 (1.45-1.87)       | 1.26 (1.07-1.48)       | 1.27 (0.94-1.73)               | 1.20 (0.98-1.45)                              |
| <b>Decreased income</b>   | <b>No (reference)</b>           | 1.00(reference)        | 1.00(reference)        | 1.00(reference)                | 1.00(reference)                               |
|                           | Yes                             | 1.37 (1.19-1.57)       | 1.18 (0.99-1.40)       | 1.12 (0.83-1.51)               | 1.22 (0.98-1.51)                              |
| <b>Educational years</b>  | <b>&lt;12 years (reference)</b> | 1.00(reference)        | 1.00(reference)        | 1.00(reference)                | 1.00(reference)                               |
|                           | >=12 years                      | 1.17 (1.01-1.37)       | 1.13 (0.94-1.36)       | 1.08 (0.80-1.47)               | 1.14 (0.90-1.44)                              |

1  
2  
3  
4  
5  
6  
7  
8  
9  
10  
11  
12  
13  
14  
15  
16  
17  
18  
19  
20  
21  
22  
23  
24  
25  
26  
27  
28  
29  
30  
31  
32  
33  
34  
35  
36  
37  
38  
39  
40  
41  
42  
43  
44  
45  
46  
47  
48  
49

## Exacerbation of Palpitation

|                           |                                 | OR(95%CI) <sup>a</sup> | OR(95%CI) <sup>b</sup> | OR(95%CI) for men <sup>b</sup> | OR(95%CI) for women <sup>b</sup> |
|---------------------------|---------------------------------|------------------------|------------------------|--------------------------------|----------------------------------|
| <b>living arrangement</b> | <b>Own home (Reference)</b>     | 1.00(reference)        | 1.00(reference)        | 1.00(reference)                | 1.00(reference)                  |
|                           | Relatives' home                 | 1.70 (1.23-2.34)       | 1.23 (0.87-1.74)       | 1.25 (0.57-2.71)               | 1.21 (0.82-1.78)                 |
|                           | Rental house, apartment         | 1.90 (1.60-2.25)       | 1.25 (1.03-1.51)       | 1.73 (1.17-2.53)               | 1.11 (0.89-1.39)                 |
|                           | Evacuation Shelter              | 0.74 (0.30-1.80)       | 0.51 (0.19-1.39)       | 0.93 (0.22-3.92)               | 0.35 (0.09-1.45)                 |
|                           | Temporary housing               | 1.32 (1.03-1.69)       | 0.82 (0.62-1.10)       | 1.19 (0.69-2.04)               | 0.72 (0.51-1.01)                 |
| <b>Unemployment</b>       | <b>No (reference)</b>           | 1.00(reference)        | 1.00(reference)        | 1.00(reference)                | 1.00(reference)                  |
|                           | Yes                             | 1.46 (1.27-1.68)       | 1.21 (1.01-1.45)       | 1.29 (0.91-1.83)               | 1.20 (0.97-1.48)                 |
| <b>Decreased income</b>   | <b>No (reference)</b>           | 1.00(reference)        | 1.00(reference)        | 1.00(reference)                | 1.00(reference)                  |
|                           | Yes                             | 1.24 (1.07-1.44)       | 1.14 (0.94-1.38)       | 1.46 (1.05-2.03)               | 1.00 (0.80-1.28)                 |
| <b>Educational years</b>  | <b>&lt;12 years (reference)</b> | 1.00(reference)        | 1.00(reference)        | 1.00(reference)                | 1.00(reference)                  |
|                           | >=12 years                      | 1.28 (1.09-1.50)       | 1.14 (0.93-1.39)       | 1.15 (0.79-1.67)               | 1.00 (0.81-1.23)                 |

## Exacerbation of Shortness of Breath

|                           |                                 | OR(95%CI) <sup>a</sup> | OR(95%CI) <sup>b</sup> | OR(95%CI) for men <sup>b</sup> | OR(95%CI) for women <sup>b</sup> |
|---------------------------|---------------------------------|------------------------|------------------------|--------------------------------|----------------------------------|
| <b>living arrangement</b> | <b>Own home (Reference)</b>     | 1.00(reference)        | 1.00(reference)        | 1.00(reference)                | 1.00(reference)                  |
|                           | Relatives' home                 | 1.60 (1.02-2.52)       | 1.16 (0.71-1.90)       | 0.95 (0.42-2.16)               | 1.33 (0.72-2.63)                 |
|                           | Rental house, apartment         | 2.34 (1.85-2.96)       | 1.76 (1.35-2.28)       | 1.50 (1.01-2.22)               | 1.98 (1.39-2.81)                 |
|                           | Evacuation Shelter              | 1.33 (0.54-3.27)       | 1.20 (0.48-3.00)       | 1.73 (0.60-4.95)               | 0.52 (0.07-3.79)                 |
|                           | Temporary housing               | 2.29 (1.72-3.06)       | 1.49 (1.07-2.08)       | 1.25 (0.75-2.09)               | 1.72 (1.10-2.68)                 |
| <b>Unemployment</b>       | <b>No (reference)</b>           | 1.00(reference)        | 1.00(reference)        | 1.00(reference)                | 1.00(reference)                  |
|                           | Yes                             | 1.55 (1.29-1.87)       | 1.13 (0.89-1.44)       | 1.06 (0.73-1.55)               | 1.17 (0.85-1.60)                 |
| <b>Decreased income</b>   | <b>No (reference)</b>           | 1.00(reference)        | 1.00(reference)        | 1.00(reference)                | 1.00(reference)                  |
|                           | Yes                             | 1.24 (1.01-1.52)       | 1.14 (0.89-1.47)       | 1.18 (0.83-1.69)               | 1.10 (0.77-1.57)                 |
| <b>Educational years</b>  | <b>&lt;12 years (reference)</b> | 1.00(reference)        | 1.00(reference)        | 1.00(reference)                | 1.00(reference)                  |
|                           | >=12 years                      | 0.94 (0.78-1.13)       | 0.84 (0.67-1.06)       | 0.76 (0.54-1.07)               | 0.90 (0.66-1.23)                 |

a. Adjusted for age and sex.

b. Further adjusted for drinking status (once or more per month, ex-drinker, less than once per month), smoking status (non-smoker, ex-smoker, current smoker), mental health distress (K6<3, K6>=13), hypertension history (yes or no), stroke history (yes or no), heart disease history (yes or no), physical activities (>= once per day, 2-4 times per week, once per week, never), tsunami experience (yes or no), radiation experience (yes or no), damage of house (no, a part of, half, more than a half, totally), loss of family member (yes or no).

## STROBE Statement—checklist of items that should be included in reports of observational studies

|                                    | Item No | Recommendation                                                                                                                                                                                                                                                                                                                                                                                                                                                                                                                                                                                                                                                                                   |
|------------------------------------|---------|--------------------------------------------------------------------------------------------------------------------------------------------------------------------------------------------------------------------------------------------------------------------------------------------------------------------------------------------------------------------------------------------------------------------------------------------------------------------------------------------------------------------------------------------------------------------------------------------------------------------------------------------------------------------------------------------------|
| <b>Title and abstract (P1-4)</b>   | 1       | (a) Indicate the study's design with a commonly used term in the title or the abstract<br>(b) Provide in the abstract an informative and balanced summary of what was done and what was found                                                                                                                                                                                                                                                                                                                                                                                                                                                                                                    |
| <b>Introduction (P6-7)</b>         |         |                                                                                                                                                                                                                                                                                                                                                                                                                                                                                                                                                                                                                                                                                                  |
| Background/rationale (P6)          | 2       | Explain the scientific background and rationale for the investigation being reported                                                                                                                                                                                                                                                                                                                                                                                                                                                                                                                                                                                                             |
| Objectives (P7)                    | 3       | State specific objectives, including any prespecified hypotheses                                                                                                                                                                                                                                                                                                                                                                                                                                                                                                                                                                                                                                 |
| <b>Methods (P7-11)</b>             |         |                                                                                                                                                                                                                                                                                                                                                                                                                                                                                                                                                                                                                                                                                                  |
| Study design (P7)                  | 4       | Present key elements of study design early in the paper                                                                                                                                                                                                                                                                                                                                                                                                                                                                                                                                                                                                                                          |
| Setting (P7)                       | 5       | Describe the setting, locations, and relevant dates, including periods of recruitment, exposure, follow-up, and data collection                                                                                                                                                                                                                                                                                                                                                                                                                                                                                                                                                                  |
| Participants (P7)                  | 6       | (a) <i>Cohort study</i> —Give the eligibility criteria, and the sources and methods of selection of participants. Describe methods of follow-up<br><i>Case-control study</i> —Give the eligibility criteria, and the sources and methods of case ascertainment and control selection. Give the rationale for the choice of cases and controls<br><i>Cross-sectional study</i> —Give the eligibility criteria, and the sources and methods of selection of participants<br>(b) <i>Cohort study</i> —For matched studies, give matching criteria and number of exposed and unexposed<br><i>Case-control study</i> —For matched studies, give matching criteria and the number of controls per case |
| Variables (P8-P10)                 | 7       | Clearly define all outcomes, exposures, predictors, potential confounders, and effect modifiers. Give diagnostic criteria, if applicable                                                                                                                                                                                                                                                                                                                                                                                                                                                                                                                                                         |
| Data sources/ measurement (P8-P10) | 8*      | For each variable of interest, give sources of data and details of methods of assessment (measurement). Describe comparability of assessment methods if there is more than one group                                                                                                                                                                                                                                                                                                                                                                                                                                                                                                             |
| Bias (None)                        | 9       | Describe any efforts to address potential sources of bias                                                                                                                                                                                                                                                                                                                                                                                                                                                                                                                                                                                                                                        |
| Study size (P7-8)                  | 10      | Explain how the study size was arrived at                                                                                                                                                                                                                                                                                                                                                                                                                                                                                                                                                                                                                                                        |
| Quantitative variables (P8-10)     | 11      | Explain how quantitative variables were handled in the analyses. If applicable, describe which groupings were chosen and why                                                                                                                                                                                                                                                                                                                                                                                                                                                                                                                                                                     |
| Statistical methods (P10-11)       | 12      | (a) Describe all statistical methods, including those used to control for confounding<br>(b) Describe any methods used to examine subgroups and interactions<br>(c) Explain how missing data were addressed<br>(d) <i>Cohort study</i> —If applicable, explain how loss to follow-up was addressed<br><i>Case-control study</i> —If applicable, explain how matching of cases and controls was addressed<br><i>Cross-sectional study</i> —If applicable, describe analytical methods taking account of sampling strategy<br>(e) Describe any sensitivity analyses                                                                                                                                |

Continued on next page

**Results (P11-14)**

|                           |     |                                                                                                                                                                                                                                                                                                                                                                                                               |
|---------------------------|-----|---------------------------------------------------------------------------------------------------------------------------------------------------------------------------------------------------------------------------------------------------------------------------------------------------------------------------------------------------------------------------------------------------------------|
| Participants (P11-12)     | 13* | (a) Report numbers of individuals at each stage of study—eg numbers potentially eligible, examined for eligibility, confirmed eligible, included in the study, completing follow-up, and analysed<br>(b) Give reasons for non-participation at each stage<br>(c) Consider use of a flow diagram                                                                                                               |
| Descriptive data (P11-13) | 14* | (a) Give characteristics of study participants (eg demographic, clinical, social) and information on exposures and potential confounders<br>(b) Indicate number of participants with missing data for each variable of interest<br>(c) <i>Cohort study</i> —Summarise follow-up time (eg, average and total amount)                                                                                           |
| Outcome data (P11)        | 15* | <i>Cohort study</i> —Report numbers of outcome events or summary measures over time<br><i>Case-control study</i> —Report numbers in each exposure category, or summary measures of exposure<br><i>Cross-sectional study</i> —Report numbers of outcome events or summary measures                                                                                                                             |
| Main results (P13-14)     | 16  | (a) Give unadjusted estimates and, if applicable, confounder-adjusted estimates and their precision (eg, 95% confidence interval). Make clear which confounders were adjusted for and why they were included<br>(b) Report category boundaries when continuous variables were categorized<br>(c) If relevant, consider translating estimates of relative risk into absolute risk for a meaningful time period |
| Other analyses<br>None    | 17  | Report other analyses done—eg analyses of subgroups and interactions, and sensitivity analyses                                                                                                                                                                                                                                                                                                                |

**Discussion (P14-18)**

|                          |    |                                                                                                                                                                            |
|--------------------------|----|----------------------------------------------------------------------------------------------------------------------------------------------------------------------------|
| Key results (P14-18)     | 18 | Summarise key results with reference to study objectives                                                                                                                   |
| Limitations (P18)        | 19 | Discuss limitations of the study, taking into account sources of potential bias or imprecision. Discuss both direction and magnitude of any potential bias                 |
| Interpretation (P14-18)  | 20 | Give a cautious overall interpretation of results considering objectives, limitations, multiplicity of analyses, results from similar studies, and other relevant evidence |
| Generalisability<br>None | 21 | Discuss the generalisability (external validity) of the study results                                                                                                      |

**Other information (P19)**

|               |    |                                                                                                                                                               |
|---------------|----|---------------------------------------------------------------------------------------------------------------------------------------------------------------|
| Funding (P19) | 22 | Give the source of funding and the role of the funders for the present study and, if applicable, for the original study on which the present article is based |
|---------------|----|---------------------------------------------------------------------------------------------------------------------------------------------------------------|

\*Give information separately for cases and controls in case-control studies and, if applicable, for exposed and unexposed groups in cohort and cross-sectional studies.

**Note:** An Explanation and Elaboration article discusses each checklist item and gives methodological background and published examples of transparent reporting. The STROBE checklist is best used in conjunction with this article (freely available on the Web sites of PLoS Medicine at <http://www.plosmedicine.org/>, Annals of Internal Medicine at <http://www.annals.org/>, and Epidemiology at <http://www.epidem.com/>). Information on the STROBE Initiative is available at [www.strobe-statement.org](http://www.strobe-statement.org).

## STROBE Statement—checklist of items that should be included in reports of observational studies

|                                    | Item No | Recommendation                                                                                                                                                                                                                                                                                                                                                                                                                                                                                                                                                                                                                                                                                   |
|------------------------------------|---------|--------------------------------------------------------------------------------------------------------------------------------------------------------------------------------------------------------------------------------------------------------------------------------------------------------------------------------------------------------------------------------------------------------------------------------------------------------------------------------------------------------------------------------------------------------------------------------------------------------------------------------------------------------------------------------------------------|
| <b>Title and abstract (P1-4)</b>   | 1       | (a) Indicate the study's design with a commonly used term in the title or the abstract<br>(b) Provide in the abstract an informative and balanced summary of what was done and what was found                                                                                                                                                                                                                                                                                                                                                                                                                                                                                                    |
| <b>Introduction (P6-7)</b>         |         |                                                                                                                                                                                                                                                                                                                                                                                                                                                                                                                                                                                                                                                                                                  |
| Background/rationale (P6)          | 2       | Explain the scientific background and rationale for the investigation being reported                                                                                                                                                                                                                                                                                                                                                                                                                                                                                                                                                                                                             |
| Objectives (P7)                    | 3       | State specific objectives, including any prespecified hypotheses                                                                                                                                                                                                                                                                                                                                                                                                                                                                                                                                                                                                                                 |
| <b>Methods (P7-11)</b>             |         |                                                                                                                                                                                                                                                                                                                                                                                                                                                                                                                                                                                                                                                                                                  |
| Study design (P7)                  | 4       | Present key elements of study design early in the paper                                                                                                                                                                                                                                                                                                                                                                                                                                                                                                                                                                                                                                          |
| Setting (P7)                       | 5       | Describe the setting, locations, and relevant dates, including periods of recruitment, exposure, follow-up, and data collection                                                                                                                                                                                                                                                                                                                                                                                                                                                                                                                                                                  |
| Participants (P7)                  | 6       | (a) <i>Cohort study</i> —Give the eligibility criteria, and the sources and methods of selection of participants. Describe methods of follow-up<br><i>Case-control study</i> —Give the eligibility criteria, and the sources and methods of case ascertainment and control selection. Give the rationale for the choice of cases and controls<br><i>Cross-sectional study</i> —Give the eligibility criteria, and the sources and methods of selection of participants<br>(b) <i>Cohort study</i> —For matched studies, give matching criteria and number of exposed and unexposed<br><i>Case-control study</i> —For matched studies, give matching criteria and the number of controls per case |
| Variables (P8-P10)                 | 7       | Clearly define all outcomes, exposures, predictors, potential confounders, and effect modifiers. Give diagnostic criteria, if applicable                                                                                                                                                                                                                                                                                                                                                                                                                                                                                                                                                         |
| Data sources/ measurement (P8-P10) | 8*      | For each variable of interest, give sources of data and details of methods of assessment (measurement). Describe comparability of assessment methods if there is more than one group                                                                                                                                                                                                                                                                                                                                                                                                                                                                                                             |
| Bias (None)                        | 9       | Describe any efforts to address potential sources of bias                                                                                                                                                                                                                                                                                                                                                                                                                                                                                                                                                                                                                                        |
| Study size (P7-8)                  | 10      | Explain how the study size was arrived at                                                                                                                                                                                                                                                                                                                                                                                                                                                                                                                                                                                                                                                        |
| Quantitative variables (P8-10)     | 11      | Explain how quantitative variables were handled in the analyses. If applicable, describe which groupings were chosen and why                                                                                                                                                                                                                                                                                                                                                                                                                                                                                                                                                                     |
| Statistical methods (P10-11)       | 12      | (a) Describe all statistical methods, including those used to control for confounding<br>(b) Describe any methods used to examine subgroups and interactions<br>(c) Explain how missing data were addressed<br>(d) <i>Cohort study</i> —If applicable, explain how loss to follow-up was addressed<br><i>Case-control study</i> —If applicable, explain how matching of cases and controls was addressed<br><i>Cross-sectional study</i> —If applicable, describe analytical methods taking account of sampling strategy<br>(e) Describe any sensitivity analyses                                                                                                                                |

Continued on next page

**Results (P11-14)**

|                           |     |                                                                                                                                                                                                                                                                                                                                                                                                               |
|---------------------------|-----|---------------------------------------------------------------------------------------------------------------------------------------------------------------------------------------------------------------------------------------------------------------------------------------------------------------------------------------------------------------------------------------------------------------|
| Participants (P11-12)     | 13* | (a) Report numbers of individuals at each stage of study—eg numbers potentially eligible, examined for eligibility, confirmed eligible, included in the study, completing follow-up, and analysed<br>(b) Give reasons for non-participation at each stage<br>(c) Consider use of a flow diagram                                                                                                               |
| Descriptive data (P11-13) | 14* | (a) Give characteristics of study participants (eg demographic, clinical, social) and information on exposures and potential confounders<br>(b) Indicate number of participants with missing data for each variable of interest<br>(c) <i>Cohort study</i> —Summarise follow-up time (eg, average and total amount)                                                                                           |
| Outcome data (P11)        | 15* | <i>Cohort study</i> —Report numbers of outcome events or summary measures over time<br><i>Case-control study</i> —Report numbers in each exposure category, or summary measures of exposure<br><i>Cross-sectional study</i> —Report numbers of outcome events or summary measures                                                                                                                             |
| Main results (P13-14)     | 16  | (a) Give unadjusted estimates and, if applicable, confounder-adjusted estimates and their precision (eg, 95% confidence interval). Make clear which confounders were adjusted for and why they were included<br>(b) Report category boundaries when continuous variables were categorized<br>(c) If relevant, consider translating estimates of relative risk into absolute risk for a meaningful time period |
| Other analyses<br>None    | 17  | Report other analyses done—eg analyses of subgroups and interactions, and sensitivity analyses                                                                                                                                                                                                                                                                                                                |

**Discussion (P14-20)**

|                          |    |                                                                                                                                                                            |
|--------------------------|----|----------------------------------------------------------------------------------------------------------------------------------------------------------------------------|
| Key results (P14-20)     | 18 | Summarise key results with reference to study objectives                                                                                                                   |
| Limitations (P18-20)     | 19 | Discuss limitations of the study, taking into account sources of potential bias or imprecision. Discuss both direction and magnitude of any potential bias                 |
| Interpretation (P14-18)  | 20 | Give a cautious overall interpretation of results considering objectives, limitations, multiplicity of analyses, results from similar studies, and other relevant evidence |
| Generalisability<br>None | 21 | Discuss the generalisability (external validity) of the study results                                                                                                      |

**Other information (P20)**

|               |    |                                                                                                                                                               |
|---------------|----|---------------------------------------------------------------------------------------------------------------------------------------------------------------|
| Funding (P20) | 22 | Give the source of funding and the role of the funders for the present study and, if applicable, for the original study on which the present article is based |
|---------------|----|---------------------------------------------------------------------------------------------------------------------------------------------------------------|

\*Give information separately for cases and controls in case-control studies and, if applicable, for exposed and unexposed groups in cohort and cross-sectional studies.

**Note:** An Explanation and Elaboration article discusses each checklist item and gives methodological background and published examples of transparent reporting. The STROBE checklist is best used in conjunction with this article (freely available on the Web sites of PLoS Medicine at <http://www.plosmedicine.org/>, Annals of Internal Medicine at <http://www.annals.org/>, and Epidemiology at <http://www.epidem.com/>). Information on the STROBE Initiative is available at [www.strobe-statement.org](http://www.strobe-statement.org).



# BMJ Open

## Effects of socioeconomic factors after a disaster on cardiovascular related symptoms among evacuees after the Great East Japan Earthquake in a population-based cross-sectional study: the Fukushima Health Management Survey

|                                 |                                                                                                                                                                                                                                                                                                                                                                                                                                                                                                                                                                                                                                                                                                                                                                                                                                                                                                                                                                                                                                                                                                                                                                                                                                                                                                                                                                                                                                                                                                                                                                                                                                                                                                                                                                                                                           |
|---------------------------------|---------------------------------------------------------------------------------------------------------------------------------------------------------------------------------------------------------------------------------------------------------------------------------------------------------------------------------------------------------------------------------------------------------------------------------------------------------------------------------------------------------------------------------------------------------------------------------------------------------------------------------------------------------------------------------------------------------------------------------------------------------------------------------------------------------------------------------------------------------------------------------------------------------------------------------------------------------------------------------------------------------------------------------------------------------------------------------------------------------------------------------------------------------------------------------------------------------------------------------------------------------------------------------------------------------------------------------------------------------------------------------------------------------------------------------------------------------------------------------------------------------------------------------------------------------------------------------------------------------------------------------------------------------------------------------------------------------------------------------------------------------------------------------------------------------------------------|
| Journal:                        | <i>BMJ Open</i>                                                                                                                                                                                                                                                                                                                                                                                                                                                                                                                                                                                                                                                                                                                                                                                                                                                                                                                                                                                                                                                                                                                                                                                                                                                                                                                                                                                                                                                                                                                                                                                                                                                                                                                                                                                                           |
| Manuscript ID                   | bmjopen-2016-014077.R2                                                                                                                                                                                                                                                                                                                                                                                                                                                                                                                                                                                                                                                                                                                                                                                                                                                                                                                                                                                                                                                                                                                                                                                                                                                                                                                                                                                                                                                                                                                                                                                                                                                                                                                                                                                                    |
| Article Type:                   | Research                                                                                                                                                                                                                                                                                                                                                                                                                                                                                                                                                                                                                                                                                                                                                                                                                                                                                                                                                                                                                                                                                                                                                                                                                                                                                                                                                                                                                                                                                                                                                                                                                                                                                                                                                                                                                  |
| Date Submitted by the Author:   | 02-Feb-2017                                                                                                                                                                                                                                                                                                                                                                                                                                                                                                                                                                                                                                                                                                                                                                                                                                                                                                                                                                                                                                                                                                                                                                                                                                                                                                                                                                                                                                                                                                                                                                                                                                                                                                                                                                                                               |
| Complete List of Authors:       | Zhang, Wen; Fukushima Medical University School of Medicine, Epidemiology<br>Ohira, Tetsuya; Fukushima Medical University, Radiation Medical Science Center for the Fukushima Health Management Survey; Fukushima Medical University School of Medicine, Epidemiology<br>Yasumura, Seiji; Fukushima Medical University<br>Maeda, Masaharu ; Fukushima Medical University, Radiation Medical Science Center for the Fukushima Health Management Survey; Fukushima Medical University School of Medicine, Disaster Psychiatry<br>Ohtsuru, Akira; Fukushima Medical University,<br>Harigane, Mayumi; Radiation Medical Science Center for the Fukushima Health Management Survey<br>Horikoshi, Naoko; Radiation Medical Science Center for the Fukushima Health Management Survey,<br>Suzuki, Yuriko; National Institute of Mental Health, National Center of Neurology and Psychiatry,<br>Yabe, Hirooki; Fukushima Medical University School of Medicine, Neuropsychiatry; Radiation Medical Science Center for the Fukushima Health Management Survey<br>Nagai, Masato<br>Nakano, Hironori ; Fukushima Medical University, Radiation Medical Science Center for the Fukushima Health Management Survey; Fukushima Medical University School of Medicine, Epidemiology<br>Hirosaki, Mayumi; Fukushima Medical University School of Medicine, Epidemiology<br>Uemura, Mayu; Fukushima Medical University School of Medicine, Epidemiology<br>Takahashi, Hideto; Fukushima Medical University School of Medicine, Information Management and Statistics Office; Fukushima Medical University School of Medicine, Radiation Medical Science Center for the Fukushima Health Management Survey<br>Kiyama, Kenji<br>Yamashita, Shunichi ; Nagasaki University School of Medicine<br>Abe, Masafumi; Fukushima Medical University, |
| <b>Primary Subject Heading</b>: | Epidemiology                                                                                                                                                                                                                                                                                                                                                                                                                                                                                                                                                                                                                                                                                                                                                                                                                                                                                                                                                                                                                                                                                                                                                                                                                                                                                                                                                                                                                                                                                                                                                                                                                                                                                                                                                                                                              |
| Secondary Subject Heading:      | Epidemiology, Sociology                                                                                                                                                                                                                                                                                                                                                                                                                                                                                                                                                                                                                                                                                                                                                                                                                                                                                                                                                                                                                                                                                                                                                                                                                                                                                                                                                                                                                                                                                                                                                                                                                                                                                                                                                                                                   |

1  
2  
3  
4  
5  
6  
7  
8  
9  
10  
11  
12  
13  
14  
15  
16  
17  
18  
19  
20  
21  
22  
23  
24  
25  
26  
27  
28  
29  
30  
31  
32  
33  
34  
35  
36  
37  
38  
39  
40  
41  
42  
43  
44  
45  
46  
47  
48  
49  
50  
51  
52  
53  
54  
55  
56  
57  
58  
59  
60

|           |                                                                                     |
|-----------|-------------------------------------------------------------------------------------|
| Keywords: | Great East Japan Earthquake, socioeconomic factors, cardiovascular related symptoms |
|           |                                                                                     |

SCHOLARONE™  
Manuscripts

For peer review only

1  
2  
3  
4  
5  
6  
7  
8  
9  
10  
11  
12  
13  
14  
15  
16  
17  
18  
19  
20  
21  
22  
23  
24  
25  
26  
27  
28  
29  
30  
31  
32  
33  
34  
35  
36  
37  
38  
39  
40  
41  
42  
43  
44  
45  
46  
47  
48  
49  
50  
51  
52  
53  
54  
55  
56  
57  
58  
59  
60

1 **Effects of socioeconomic factors after a disaster on**  
2 **cardiovascular related symptoms among evacuees after the**  
3 **Great East Japan Earthquake in a population-based**  
4 **cross-sectional study: the Fukushima Health Management**  
5 **Survey**

6  
7 Wen Zhang<sup>1,2</sup>, Tetsuya Ohira<sup>1,2</sup>, Seiji Yasumura<sup>1,3</sup>, Masaharu Maeda<sup>1,4</sup>,  
8 Akira Otsuru<sup>1,5</sup>, Mayumi Harigane<sup>1</sup>, Naoko Horikoshi<sup>1</sup>, Yuriko Suzuki<sup>1,6</sup>,  
9 Hirooki Yabe<sup>1,7</sup>, Masato Nagai<sup>1,2</sup>, Hironori Nakano<sup>1,2</sup>, Mayumi Hirosaki<sup>2</sup>,  
10 Mayu Uemura<sup>2</sup>, Hideto Takahashi<sup>1</sup>, Kenji Kamiya<sup>1,8</sup>, Shunichi Yamashita<sup>1,9</sup>,  
11 Masafumi Abe<sup>1</sup>, for the Fukushima Health Management Survey Group

12  
13 1. Radiation Medical Science Center for the Fukushima Health Management  
14 Survey, Fukushima, Japan

15 2. Department of Epidemiology, School of Medicine, Fukushima Medical  
16 University, Fukushima, Japan

17 3. Department of Public Health, School of Medicine, Fukushima Medical  
18 University, Fukushima, Japan

19 4. Department of Disaster Psychiatry, School of Medicine, Fukushima Medical  
20 University, Fukushima, Japan

21 5. Department of Radiation Health Management, Fukushima Medical University,  
22 Fukushima, Japan

23 6. National Institute of Mental Health, National Center of Neurology and  
24 Psychiatry, Tokyo, Japan

- 1  
2  
3  
4  
5  
6 25 7. Department of Neuropsychiatry, School of Medicine, Fukushima Medical  
7  
8 26 University, Fukushima, Japan  
9  
10 27 8. Department of Experimental Oncology, Research Institute for Radiation Biology  
11  
12 28 and Medicine, Hiroshima University, Hiroshima, Japan  
13  
14 29 9. Japan and Atomic Bomb Disease Institute, Nagasaki University, Nagasaki,  
15  
16 30 Japan  
17  
18  
19  
20  
21  
22  
23  
24

25 34 **Correspondence:**

26 35 Wen Zhang, PHD

27 36 Department of Epidemiology, School of Medicine, Fukushima Medical University, 1  
28 37 Hikariga-oka, Fukushima City 960-1295, JAPAN

29 38 Phone: +81-24-547-1343; Fax: +81-24-547-1336

30 39 E-mail: [zhangw09@fmu.ac.jp](mailto:zhangw09@fmu.ac.jp)  
31  
32  
33  
34  
35  
36  
37  
38  
39  
40  
41  
42  
43  
44  
45  
46  
47  
48  
49  
50  
51  
52  
53  
54  
55  
56  
57  
58  
59  
60

1  
2  
3  
4  
5  
6  
7  
8  
9  
10  
11  
12  
13  
14  
15  
16  
17  
18  
19  
20  
21  
22  
23  
24  
25  
26  
27  
28  
29  
30  
31  
32  
33  
34  
35  
36  
37  
38  
39  
40  
41  
42  
43  
44  
45  
46  
47  
48  
49  
50  
51  
52  
53  
54  
55  
56  
57  
58  
59  
60

50 **Abstract**

51 **Objective:** To investigate the association between socioeconomic factors and the  
52 exacerbation of cardiovascular symptoms among evacuees after Great East Japan  
53 Earthquake.

54 **Methods:** A total of 73,433 subjects were included in the Fukushima Health  
55 Management survey. Exacerbation of headache, dizziness, palpitations, and shortness  
56 of breath were determined from self-report questionnaires. Socioeconomic factors  
57 included living arrangement, loss of employment and decreased income. Odds ratios  
58 (OR) and 95% confidence intervals (CI) of socioeconomic factors were estimated for  
59 each symptom using multiple logistic regression analyses.

60 **Results:** A total of 1,375 individuals reported exacerbation of headache, 881 of  
61 dizziness, 768 of palpitations, and 434 of shortness of breath. Evacuation  
62 accommodation was associated with all the above symptoms. Compared to participants  
63 living in their own home (OR=1.00), subjects living in relatives' homes had increased  
64 odds of experiencing exacerbation of headache (1.58; 95% CI 1.20–2.09) and dizziness  
65 (1.43; 95% CI 1.02–1.98); subjects living in temporary housing or apartments showed  
66 exacerbation of headache (1.55; 95% CI 1.32–1.81), dizziness (1.45; 95% CI 1.20–  
67 1.76), palpitations (1.25; 95% CI 1.03–1.51), and shortness of breath (1.75; 95% CI  
68 1.35–2.27); subjects living in evacuation shelters showed exacerbation of headache  
69 (1.80; 95% CI 1.10–2.97); and refugees living in temporary housing showed  
70 exacerbated headache (1.42; 95% CI 1.15–1.75), dizziness (1.39; 95% CI 1.08–1.78),  
71 and shortness of breath (1.50; 95% CI 1.07–2.09). Compared to the evacuees that  
72 retained their jobs, unemployed subjects showed increased odds for exacerbation of  
73 headache (1.28, 95% CI 1.12–1.46), dizziness (1.26, 95% CI 1.07–1.48), and

1  
2  
3  
4  
5  
6 74 palpitations (1.22, 95% CI 1.02–1.46). Decreased income was associated with  
7  
8 75 exacerbation of headache (1.39, 95% CI 1.21–1.60).

9  
10 76 **Conclusion:** After the earthquake, living in non-home conditions was more likely to  
11  
12 77 exacerbate cardiovascular symptoms among evacuees. Loss of employment was  
13  
14 78 another risk factor for exacerbated headache and dizziness.  
15

16  
17 79

18  
19 80

20  
21 81 **Keywords:** Great East Japan Earthquake, socioeconomic factors, cardiovascular related

22  
23 82 symptoms  
24

25  
26 83

27  
28 84

29  
30 85

31  
32 86

33  
34 87

35  
36 88

37  
38 89

39  
40 90

41  
42 91

43  
44 92

45  
46 93

47  
48 94

49  
50 95

51  
52 96

53  
54 97

55  
56  
57  
58  
59  
60

1  
2  
3  
4  
5  
6 98 **Strengths and limitations of this study**  
7

- 8 99 ● Our study is the first to identify an inverse relationship between low socioeconomic  
10 status and exacerbated cardiovascular related symptoms among evacuees of the  
11 number of 73,433 subjects after the Great East Japan earthquake.  
12  
13  
14 102 ● A limitation of the present study was based on a subjectivity of self-response survey.  
15  
16 103 And the exacerbated symptoms would not be logical predict cardiovascular  
17  
18 104 diseases.  
19  
20  
21 105 ● An overall response rate was low (40.7%) and data may have contained sampling  
22  
23 106 biases.  
24  
25 107 ● Another limitation of the present study was the information of changes in family  
26  
27 108 relationships (e.g., death, physical separation) among the evacuees after the  
28  
29 109 disaster has not been captured.  
30  
31  
32 110 ● In addition, most questionnaires were collected in the same period (from Jan 2012  
33  
34 111 to Mar 2012).  
35  
36  
37  
38  
39  
40  
41  
42  
43  
44  
45  
46  
47  
48  
49  
50  
51  
52  
53  
54  
55  
56 121

1  
2  
3  
4  
5  
6 122 **Introduction**

7 123 The Great East Japan Earthquake and the subsequent Fukushima Daiichi nuclear  
8  
9 124 disaster, which occurred in March 2011, was the most destructive catastrophe in Japan  
10  
11 125 to date. Due to concerns over released radiation, most of the residents in nearby towns  
12  
13 126 were forced to evacuate and consequently suffered long-lasting anxiety. Shortly after  
14  
15 127 the disaster, a Fukushima Health Management Survey was conducted to investigate the  
16  
17 128 effects of long-term low-dose radiation exposure caused by the accident and to assess  
18  
19 129 the physical and mental wellbeing of evacuees. This survey included a basic survey,  
20  
21 130 which estimated individual radiation exposure of each resident, and four detailed  
22  
23 131 surveys comprising of a Comprehensive Health Check and thyroid ultrasonography, a  
24  
25 132 mental health and lifestyle survey, and a survey of pregnant women and nursing  
26  
27 133 mothers (1). The Mental Health and Lifestyle Survey used self-report questionnaires to  
28  
29 134 investigate health status and lifestyle of the refugees, including nutrition and diet,  
30  
31 135 perceived symptoms of illness, disaster-related experience, and socioeconomic  
32  
33 136 determinants.

34  
35  
36  
37  
38 137 Several previous studies have shown changes in the incidence of cardiovascular  
39  
40 138 events following disasters; however, results are conflicting (2-11). A recent study  
41  
42 139 reported a heterogeneous occurrence of cardiovascular events after the Great East  
43  
44 140 Japan Earthquake (2), while another study reported a significant increase in the  
45  
46 141 incidence of cardioembolic stroke after the earthquake (11). However, neither study  
47  
48 142 examined the incidence of perceived cardiovascular disease symptoms after a disaster,  
49  
50 143 nor did they focus on the effect of refugee socioeconomic status on health problems  
51  
52 144 during their evacuation term. However, considering these aspects is relevant for  
53  
54  
55  
56  
57  
58  
59  
60



1  
2  
3  
4  
5  
6 145 reviewing refugee health status, accessing the incidence of various diseases, and  
7  
8 146 providing health guidelines for refugees.  
9

10 147 Consequently, we conducted the present study to investigate the risk factors of  
11  
12 148 perceived cardiovascular symptoms following a major disaster. In the present study,  
13  
14 149 socioeconomic determinants included educational years, living arrangement, change of  
15  
16 150 employment and income. Due to the special post-disaster situation, change of  
17  
18 151 employment and income due to the disaster, instead of job and income level were  
19  
20 152 captured. Thus in the present study, a decrease or low socioeconomic status was  
21  
22 153 considered as less educational years, living in non-home conditions, unemployment or  
23  
24 154 decreased income due to the disaster. We hypothesized that a decrease in  
25  
26 155 socioeconomic status due to the earthquake would be associated with exacerbated  
27  
28 156 cardiovascular symptoms among evacuees.  
29  
30  
31

32 157

## 33 34 158 **Methods**

### 35 36 159 **Participants**

37  
38 160 The primary purpose of the Fukushima Health Management Survey was to monitor  
39  
40 161 the long-term health and lifestyle of Fukushima residents and to provide them with  
41  
42 162 appropriate care (12). The Fukushima Health Management Survey consists of a basic  
43  
44 163 survey and four detailed surveys, namely, the thyroid ultrasound examination,  
45  
46 164 comprehensive health check, mental health and lifestyle survey, and pregnancy and  
47  
48 165 birth survey (for details of these surveys see (1)). The subjects of mental health and  
49  
50 166 lifestyle survey was included in the present study. Briefly, the target population, consists  
51  
52 167 of 210,189 officially registered victims of the Great East Japan Earthquake from the  
53  
54 168 evacuation zones Hirono Town, Naraha Town, Tomioka Town, Kawauchi Village,  
55  
56  
57  
58  
59  
60

1  
2  
3  
4  
5  
6 169 Futaba Town, Namie Town, Katsurao Village, Minamisoma City, Tamura City,  
7  
8 170 Yamakiya District of Kawamata Town, and Iitate Village. In 2012, 180,604  
9  
10 171 questionnaires were sent out with 73,569 questionnaires returned with responses, i.e. a  
11  
12 172 response rate of 40.7%. Among the responders, 136 were excluded due to blank or  
13  
14 173 duplicated questionnaires and 9,245 for questionnaires filled in by a proxy. After  
15  
16 174 exclusion, the data of 73,433 subjects (32,301 men and 41,132 women) were used in  
17  
18 175 our analyses.

19  
20  
21 176 The study protocol was approved by the Ethics Committee of Fukushima Medical  
22  
23 177 University. Participants who returned the self-administered questionnaires were  
24  
25 178 considered to have consented to participate.  
26  
27  
28  
29

### 30 180 **Data collection and measurement**

31  
32 181 A questionnaire was used to broadly investigate the health status and lifestyle of  
33  
34 182 the refugees. The exacerbation of headache, dizziness, palpitations, and shortness of  
35  
36 183 breath was determined based on self-reports in the questionnaire. All subjects were  
37  
38 184 asked to answer the question 'Do you have the following perceived symptoms after the  
39  
40 185 earthquake?' and could choose between the replies 'No', 'Yes', and 'Exacerbation'. In  
41  
42 186 the present study we focused on reports of 'exacerbation'.  
43  
44

45 187 To evaluate Posttraumatic Stress Disorder (PTSD) symptoms we used the  
46  
47 188 non-military version of the Posttraumatic Stress Disorder Checklist (PCL-S) (12). This is  
48  
49 189 a 17-item self-report checklist based on the Diagnostic and Statistical Manual of Mental  
50  
51 190 Disorders (4th edition, DSM-IV) criteria (13), with each item rated using a Likert-type  
52  
53 191 scale from one ('not at all') to five ('extremely'). Respondents were requested to  
54  
55 192 respond to questions about each PTSD symptom separately and report whether they  
56  
57  
58  
59  
60

1  
2  
3  
4  
5  
6 193 had experienced a given symptom during the past month. Based on summing the  
7  
8 194 scores from each of the 17 items, a total PCL-S score can range from 17 to 85 (12).  
9

10 195 In addition to the PCL-S checklist, the following items were included in the  
11  
12 196 self-assessment and self-report questionnaires:  
13

14 197 1. Demographic characteristics  
15

16 198 Demographic subject characteristics include gender, age group, mental health  
17  
18 199 status, history of mental illness, incidence of PTSD symptoms, smoking and drinking  
19  
20 200 habits, and current physical activity levels. Age groups were divided into childbearing  
21  
22 201 age (20–49 years), middle age (50–64 years), and old age (65 years and above).  
23  
24

25 202 Mental health status, and specifically incidence and severity of depression, was  
26  
27 203 measured by the Japanese version of the K6 Kessler Psychological Distress Scale,  
28  
29 204 which has been validated by previous studies (14, 15). In the K6 assessment,  
30  
31 205 participants were asked if they had experienced any of the following six symptoms  
32  
33 206 during the past 30 days: feeling so depressed that nothing could cheer them up, feeling  
34  
35 207 that everything was an effort, or feeling nervous, hopeless, restless, fidgety, or  
36  
37 208 worthless. Each question was rated on a 5-point Likert-type scale from zero (none of the  
38  
39 209 time) to four (all of the time), with higher scores signifying worse mental health status  
40  
41 210 (total range: 0–24) (12). In addition, we assessed participant's history of mental illness  
42  
43 211 by self-report as 'yes' or 'no'.  
44  
45

46 212 We obtained data on smoking and drinking habits using the following metrics,  
47  
48 213 respectively: 'non-smoker', 'ex-smoker', or 'current smoker'; and 'once or more per  
49  
50 214 month', 'less than once per month', or 'ex- drinker'. Participants had four options to  
51  
52 215 assess current physical activity level: 'every day', '2-4 times/week', 'once a week', or  
53  
54 216 'nearly none'.  
55  
56  
57  
58  
59  
60

1  
2  
3  
4  
5  
6 217 2. Socioeconomic variables

7  
8 218 Participants were required to select from six options regarding their living  
9  
10 219 arrangements: evacuation shelter, temporary housing, rental housing or apartment, a  
11  
12 220 relative's home, their own home, and other. The last option was considered  
13  
14 221 non-informative due to its ambiguity and thus excluded from analysis.

15  
16 222 Other socioeconomic variables included educational years (< 12 years, >=12 years),  
17  
18 223 change in employment status and change in income. By answering 'Yes' to either  
19  
20 224 question, the participant indicated he/she became unemployed or experienced  
21  
22 225 decreased income since the disaster.

23  
24  
25 226 3. Disaster-related variables

26  
27 227 Disaster-related variables included experience of the tsunami (yes or no), experience  
28  
29 228 of the nuclear power plant accident (defined as hearing the explosion; yes or no), losing  
30  
31 229 someone close because of the disaster (yes or no), and damage to accommodation (no,  
32  
33 230 partial damage, half of accommodation destroyed, more than a half destroyed, total  
34  
35 231 destruction).

36  
37  
38 232  
39  
40 233 **Statistical analysis**

41  
42 234 The incidence of exacerbation of headache, dizziness, palpitations, and shortness of  
43  
44 235 breath was compared between subjects with different demographic, socioeconomic,  
45  
46 236 and disaster-related characteristics using chi-square tests. For the analyses  
47  
48 237 investigating PTSD incidence, a PCL-S cut-off score of 50 was used, according to  
49  
50 238 Weathers et al (16-19). Subjects who received a PCL-S of 50 or greater were allocated  
51  
52 239 to the 'high-scoring group' and compared to the low-scoring (PCL-S < 50) group using  
53  
54 240 chi-square tests.  
55  
56  
57  
58  
59  
60

1  
2  
3  
4  
5  
6 241 Odds ratios (ORs) and 95% confidence intervals (CIs) of each socioeconomic  
7  
8 242 determinant (living arrangement, unemployment, decreased income and educational  
9  
10 243 years were estimated by applying multiple logistic regression models. Adjustment  
11  
12 244 variables consisted of sex (male, female), age (20–49, 50–64, ≥65 years), drinking  
13  
14 245 status (once or more per month, ex-drinker, less than once per month), smoking status  
15  
16 246 (non-smoker, ex-smoker, current smoker), mental health distress (K6<3, K6≥13),  
17  
18 247 hypertension history (yes or no), stroke history (yes or no), heart disease history (yes or  
19  
20 248 no), physical activities (≥ once per day, 2–4 times per week, once per week, never),  
21  
22 249 tsunami experience (yes or no), radiation experience (yes or no), damage of  
23  
24 250 accommodation (no, partial, half, more than a half, total), loss of family member (yes or  
25  
26 251 no).

27  
28  
29 252 We conducted the above analyses both for separate and combined sexes. All  
30  
31 253 analyses were conducted using SAS software version 9.4 (SAS Institute Inc., Cary, NC,  
32  
33 254 USA).

34  
35  
36 255

## 37 38 256 **Results**

39  
40 257 As shown in the tables, 1,893 (2.6%) individuals reported exacerbation of headaches,  
41  
42 258 1,229 (1.7%) of dizziness, 626 (0.9%) of palpitations, and 434 (0.6%) exacerbation of  
43  
44 259 shortness of breath.

## 45 46 47 260 **Demographic characteristics**

48  
49 261 Table 1 summarizes the demographic characteristics of the subjects. Exacerbation of  
50  
51 262 the above cardiovascular symptoms was significantly more likely to happen in women  
52  
53 263 than in men (3.5% vs. 1.4% for headaches; 2.2% vs. 1.1% for dizziness; 2.0% vs. 0.9%  
54  
55 264 for palpitations; 0.9% vs. 0.8% for shortness of breath). Subjects experiencing  
56  
57  
58  
59  
60

1  
2  
3  
4  
5  
6 265 exacerbation of headaches, dizziness, or palpitations were more likely to be young (20–  
7  
8 266 49 years), while those experiencing exacerbation of shortness of breath were more  
9  
10 267 likely to be 50-64 years. Subjects experiencing exacerbation of cardiovascular  
11  
12 268 symptoms were also more likely to suffer from depression (K6 $\geq$ 13) and Posttraumatic  
13  
14 269 Stress Disorder (PCL $\geq$ 50), and to commonly have a history of hypertension, stroke, or  
15  
16 270 heart disease. Non-smokers and non-drinkers were no less likely than (ex-) smokers or  
17  
18 271 (ex-) drinkers to experience exacerbation of cardiovascular symptoms. However,  
19  
20 272 symptom exacerbation was most pronounced in subjects who were physically active  
21  
22 273 less than once a day.

#### 274 **Socioeconomic variables**

275 Table 1 also shows refugees living in their own or a relative's home are less likely to  
276 experience exacerbated cardiovascular symptoms. Of the refugees living in their own  
277 home, 1.4% reported exacerbation of headache, 0.9% of dizziness, 1.6% of palpitations  
278 and 1.0% of shortness of breath. The corresponding statistics for refugees living in  
279 temporary housing and rental houses/apartments were 2.8%, 1.9%, 1.3%, and 1.2%  
280 and 3.5%, 2.1%, 1.8%, and 1.0%, respectively.

281 In the group that became unemployed due to the disaster, 4.2% subjects reported  
282 the exacerbation of headache, 2.5% of dizziness, 2.1% of palpitations and 1.1% of  
283 shortness of breath, while the corresponding statistics for the group that did not lose  
284 their jobs after the disaster were 2.2%, 1.5%, 1.4%, and 0.8%. Exacerbation of most  
285 cardiovascular symptoms was higher in subjects whose income decreased due to the  
286 disaster compared to those who maintained income levels (3.6% vs. 2.4% for  
287 exacerbation of headache, 2.0% vs. 1.6% for exacerbation of dizziness, and 1.7% vs.  
288 1.4% for exacerbation of palpitation).

1  
2  
3  
4  
5  
6 289 In addition, exacerbation of most cardiovascular symptoms was higher in subjects  
7  
8 290 who had 12 years education or more compared to those who had less education (2.9%  
9  
10 291 vs. 1.9% for exacerbation of headache, 1.8% vs. 1.4% for exacerbation of dizziness,  
11  
12 292 and 1.6% vs. 1.2% for exacerbation of palpitation).  
13

14  
15 293

#### 16 294 **Disaster-related variables**

17  
18 295 Subjects that directly experienced the tsunami and the nuclear power plant accident  
19  
20 296 were more likely to experience exacerbated cardiovascular symptoms. Among those  
21  
22 297 experiencing the tsunami, 3.2% reported exacerbation of headache, 2.2% of dizziness,  
23  
24 298 1.7% of palpitations, and 1.7% of shortness of breath, compared to 2.4%, 1.6%, 1.5%,  
25  
26 299 and 0.8%, respectively, of subjects with no experience of the tsunami. The  
27  
28 300 corresponding statistics for subjects that had heard the nuclear power plant accident  
29  
30 301 were 3.1%, 2.1%, 1.9%, and 1.1% compared to 2.1%, 1.2%, 1.0%, and 0.6%, that had  
31  
32 302 not.  
33

#### 34 303 **Multiple Logistic Regression analyses**

35  
36 304 Table 2 summarizes the odds ratios (ORs) and 95% CIs of each socioeconomic  
37  
38 305 determinant for exacerbation of headache, dizziness, palpitations, and shortness of  
39  
40 306 breath. Living arrangement emerged as a risk factor for exacerbated cardiovascular  
41  
42 307 symptoms from our models, which were adjusted for multiple demographic-, health-,  
43  
44 308 and disaster-related variables. Compared to participants living in their own home (OR =  
45  
46 309 1), those living in relatives' homes had higher odds to experience exacerbation of  
47  
48 310 headache (1.58; 95% CI 1.19–2.09) and dizziness (1.42; 95% CI 1.02–1.98). Similarly,  
49  
50 311 subjects living in rental houses or apartments had higher odds of exacerbated  
51  
52 312 headache (1.54; 95% CI 1.32–1.80), dizziness (1.45; 95% CI 1.20–1.75), palpitations  
53  
54  
55  
56  
57  
58  
59  
60

1  
2  
3  
4  
5  
6 313 (1.25; 95% CI 1.03–1.51), and shortness of breath (1.76; 95% CI 1.35–2.28).  
7  
8 314 Participants living in evacuation shelters had increased odds of exacerbation of  
9  
10 315 headache (1.80; 95% CI 1.09–2.96) and refugees living in temporary housing similarly  
11  
12 316 had increased odds of exacerbation of headache (1.42; 95% CI 1.15–1.72), dizziness  
13  
14 317 (1.40; 95% CI 1.09–1.79), and shortness of breath (1.49; 95% CI 1.07–2.08).

15  
16  
17 318 Loss of employment also emerged as a risk factor for increased odds of  
18  
19 319 cardiovascular symptoms. Compared to the evacuees that remained employed (OR =  
20  
21 320 1), subjects that had become unemployed were at higher risk of experiencing  
22  
23 321 exacerbation of headache (1.28; 95% CI 1.12–1.46), dizziness (1.26; 95% CI 1.07–  
24  
25 322 1.48), and palpitation (1.21; 95% 1.01–1.45). In an unadjusted model, we found a  
26  
27 323 significant positive association between unemployment and exacerbation of  
28  
29 324 palpitations; however, after adjusting for multiple relevant variables, this association  
30  
31 325 became non-significant.

32  
33  
34 326 There was no association between decreased income and exacerbated  
35  
36 327 cardiovascular symptoms, except for headache. Here, adjusting for multiple variables  
37  
38 328 resulted in an increased odds ratio for exacerbation of headaches both in an analysis  
39  
40 329 combining both sexes (1.39, 95% CI 1.22–1.60) and in separate analyses of men and  
41  
42 330 women.

43  
44  
45 331 Educational years was not associated with and exacerbated cardiovascular  
46  
47 332 symptoms in multiple-adjusted models in the present study.

48  
49 333

## 50 51 334 **Discussion**

52  
53 335 We have demonstrated a decrease in socioeconomic status due to the earthquake  
54  
55 336 was associated with exacerbated cardiovascular symptoms among evacuees of the  
56  
57  
58  
59  
60



1  
2  
3  
4  
5  
6 337 Great East Japan Earthquake. Compared with participants living in their own home,  
7  
8 338 people of both genders living in relatives' homes, evacuation shelters, temporary  
9  
10 339 housing, or rental houses or apartments were more likely to experience exacerbated  
11  
12 340 headache, dizziness, palpitations, or shortness of breath. Similarly, loss of employment  
13  
14 341 and reduced income due to the disaster increased the risk of exacerbated symptoms.

15  
16 342 The following three points should be considered in the context of our results. Firstly,  
17  
18 343 earthquakes are definitely associated with increased cardiovascular disease, including  
19  
20 344 sudden cardiac death and acute myocardial infarction (2-14), which provides some  
21  
22 345 support for the present study. The Hanshin-Awaji earthquake was associated with an  
23  
24 346 increased cardiovascular disease and the increase persisted for more than a month. In  
25  
26 347 addition, an increase in the number of subjects with acute myocardial infarction,  
27  
28 348 especially in women, was particularly evident during the first 4 weeks post-disaster (9).  
29  
30 349 After the Great East Japan Earthquake, the incidence of reported cardioembolic stroke  
31  
32 350 increased in the first 3–9 months following the disaster (10), as did the incidence of  
33  
34 351 other cardiovascular diseases (11-14). Our study contributes to the reported incidences  
35  
36 352 of cardiovascular disease by demonstrating exacerbated cardiovascular symptoms  
37  
38 353 among evacuees after a disaster from self-report questionnaires rather than from death  
39  
40 354 certificates.

41  
42 355 Secondly, increases in cardiovascular events and exacerbated cardiovascular  
43  
44 356 symptoms can be attributed to post-disaster distress or mental problems. A review  
45  
46 357 suggests that extremely stressful experiences, such as earthquakes, can trigger  
47  
48 358 cardiovascular events (20-22). Acute major stress and chronic stress, i.e. the  
49  
50 359 cumulative load of minor daily stress, can have both long-term consequences, which  
51  
52 360 can be perceived as stressful and a potential threat to one's environment, subsequently  
53  
54  
55  
56  
57  
58  
59  
60

1  
2  
3  
4  
5  
6 361 inducing a variety of negative emotional responses, such as fear, anxiety, sadness,  
7  
8 362 anger, hostility, and depression (4,23) leading to hypertension or cardiovascular events  
9  
10 363 (20-22). A recent study suggest that post-traumatic stress disorder (PTSD) was  
11  
12 364 frequently noted in CVD patients at 6 months after the Great East Japan Earthquake.  
13  
14 365 The patients with PTSD were more likely to experience a composite of death, acute  
15  
16 366 myocardial infarction, stroke and heart disease (24). In the current study, all subjects  
17  
18 367 exhibiting exacerbated cardiovascular symptoms were more likely to have depression  
19  
20 368 (K6 $\geq$ 13) or Posttraumatic Stress Disorder (PCL $\geq$ 50). Logistic regression analyses  
21  
22 369 also showed that depression and Posttraumatic Stress Disorder were both  
23  
24  
25 370 independently associated with exacerbated cardiovascular symptoms (data not shown).  
26

27  
28 371 Thirdly, although post-disaster increases in cardiovascular events were widely  
29  
30 372 reported in previous studies, the investigation of socioeconomic determinants of these  
31  
32 373 events during the evacuation term of refugees was very limited. Previous studies  
33  
34 374 reported that one year after the Wenchuan Earthquake in China, depression severity  
35  
36 375 among refugees varied with income, housing status, and social support (25), indicating  
37  
38 376 that earthquake impact on income was indirectly associated with life satisfaction and  
39  
40 377 depression via its effect on financial status (26). Another study showed that six months  
41  
42 378 after the 2011 Christchurch earthquake in New Zealand, on average lower income per  
43  
44 379 home contributed unequivocally to earthquake-related distress and dysfunction (27). A  
45  
46  
47 380 recent study also showed that at 6 months after the Great East Japan Earthquake,  
48  
49 381 Tsunami experience, property loss and poverty were associated with PTSD in CVD  
50  
51 382 patients and had an had an adverse prognostic impact (24).  
52

53  
54 383 In the present study, not living in the own home but living in evacuation shelters or  
55  
56 384 temporary housing, was associated with exacerbation of all examined cardiovascular  
57  
58  
59  
60

1  
2  
3  
4  
5 385 symptoms, which was more robust in women than in men. Evacuation shelters and  
6  
7 386 temporary housing were less spacious, damper, and less comfortable than the refugees'  
8  
9 387 homes. Due to insufficient access to supermarkets or shortages of cooking equipment  
10  
11 388 and utilities, such as gas, evacuees living in shelters would struggle to access balanced  
12  
13 389 meals. A recent cross-sectional study showed a well-balanced diet was associated with  
14  
15 390 better living conditions among refugees after the Great East Japan Earthquake,  
16  
17 391 whereas imbalanced diets, were not (27,28). In addition, having to take refuge in  
18  
19 392 accommodation other than the own home meant that the own neighborhood had been  
20  
21 393 damaged by the disaster, which may lead to shortness of social support. In addition,  
22  
23 394 among the refugees. All of the above factors can be considered predictors of stress  
24  
25 395 among refugees, where women may be more likely to be influenced than men.  
26  
27  
28

29 396 Unemployment and decreased income due to the disaster were also associated with  
30  
31 397 exacerbation of some cardiovascular symptoms. These results were expected as poor  
32  
33 398 economic circumstances are expected to exacerbate depression. Low income may be  
34  
35 399 considered a chronic stressor, increasing psychological distress as a result of limited  
36  
37 400 resource access and opportunities for resource accumulation (29). Previous studies  
38  
39 401 also showed that, following an earthquake, living in a low-income area may contribute to  
40  
41 402 greater psychological distress due to lack of occupational, social, and financial  
42  
43 403 resources. A community study showed that, after the Christchurch earthquake, low  
44  
45 404 household income contributed strongly to earthquake-related distress (29). In the  
46  
47 405 present study, we found a significant association between disaster-related  
48  
49 406 unemployment and exacerbation of some cardiovascular symptoms, but the  
50  
51 407 subsistence allowance provided to refugees by the Japanese government may have  
52  
53  
54  
55  
56  
57  
58  
59  
60

1  
2  
3  
4  
5  
6 408 reduced effect size by reducing the impact of lowered economic circumstances on  
7  
8 409 refugees.

9  
10 410 Educational level was inversely associated with cardiovascular disease risk in present  
11  
12 411 studies (30, 31). However, in present study, educational years was not associated with  
13  
14 412 exacerbated cardiovascular symptoms. It may due to the post-disaster conditions. In the  
15  
16 413 present study, both earthquake, tsunami and nuclear accident related factors and  
17  
18 414 unemployment or decreased income due to the disasters had a large influence on the  
19  
20 415 exacerbated cardiovascular symptoms of the subjects, which may weaken the impact  
21  
22 416 from the educational levels.

23  
24  
25 417 Our understanding of disaster-related stress on cardiovascular disease remains  
26  
27 418 incomplete. A clinical study on the 1995 Hanshin-Awaji earthquake comparing pre- and  
28  
29 419 post- BP levels in well-controlled hypertension patients showed an increase of 18mmHg  
30  
31 420 in diastolic blood pressure two weeks after the earthquake (32). Although white-coat  
32  
33 421 hypertension contributed partly to the results, whereby patients exhibit increased blood  
34  
35 422 pressure in clinical settings, some patients developed sustained hypertension that  
36  
37 423 persisted for one year after the earthquake (32). One study found increased levels of  
38  
39 424 cholesterol and triglycerides a few weeks after an earthquake (3), whereas other studies  
40  
41 425 failed to show significantly higher total cholesterol or HDL-cholesterol during the first two  
42  
43 426 weeks after the Hanshin-Awaji earthquake (6). Therefore, the extent to which changes  
44  
45 427 in blood lipid profile contributes to exacerbated cardiovascular symptoms several  
46  
47 428 months after the Great East Japan Earthquake remains undetermined. Chronic  
48  
49 429 psychological stress is also associated with increased insulin resistance (4). A recent  
50  
51 430 study after the Great East Japan Earthquake found the negative effects of the disaster  
52  
53  
54  
55  
56  
57  
58  
59  
60

1  
2  
3  
4  
5  
6 431 on metabolic factors were greater among evacuees than non-evacuees (33), which may  
7  
8 432 contribute to exacerbated cardiovascular symptoms among evacuees.  
9

10 433 The large scale of assessment and assessment under post-disaster  
11  
12 434 conditions provide considerable authority for the present study. In addition, our study is  
13  
14 435 the first to identify an inverse relationship between low socioeconomic status  
15  
16 436 and exacerbated cardiovascular symptoms from an evacuee self-report after a disaster;  
17  
18 437 our results will be useful for generating guidelines for evacuee health. However, the  
19  
20 438 following study limitations should be considered: Firstly, The study was based on a  
21  
22 439 subjectivity of self-response survey. It is reasonable to understand these symptoms as  
23  
24 440 those related to stress and/or autonomic nervous system disorders. Further information,  
25  
26 441 such as the incidence of cardiovascular disease should be captured. However, though  
27  
28 442 the above-mentioned symptoms would not be logical predict cardiovascular diseases,  
29  
30 443 several previous studies showed headache was suggestive of an incremental risk for  
31  
32 444 stroke (34, 35), and other studies also showed that vertigo or dizziness, chest pain was  
33  
34 445 associated with cardiovascular problems (36, 37). We also conducted a sub-analyses  
35  
36 446 suggest that all the above-mentioned symptoms were associated with the diagnosis of  
37  
38 447 hypertension in the last year by self-report and exacerbation of dizziness, palpitation  
39  
40 448 and shortness of breath was associated with the diagnosis of heart disease in the last  
41  
42 449 year by self-report among the evacuees (data not shown). Therefore, our study of the 4  
43  
44 450 symptoms may be helpful for improvement of evacuees' health to some extent.  
45  
46  
47 451 Secondly, not only the Great East Japan Earthquake but also the accompanied nuclear  
48  
49 452 accident had a large psychological impact on the evacuees, thus the present study may  
50  
51 453 cannot be unconditionally compared with other studies due to the special situation.  
52  
53  
54 454 Thirdly, the overall response rate was low (40.7%) and data may have contained  
55  
56  
57  
58  
59  
60

1  
2  
3  
4  
5  
6 455 sampling biases. Thirdly, under the extraordinary and unusual social circumstances that  
7  
8 456 follow a major disaster, health symptoms perceived by evacuees may be strongly  
9  
10 457 influenced by changes in family relationships (e.g., death, physical separation) among  
11  
12 458 the evacuees. However, the present study did not capture these information. Moreover,  
13  
14 459 other socioeconomic determinants, such as household income, and other  
15  
16 460 cardiovascular risk factors, such as blood pressure, cholesterol levels, were not  
17  
18 461 captured in the present study either. In addition, although most questionnaires were  
19  
20 462 collected in the same period (from Jan 2012 to Mar 2012), it is possible the timing of the  
21  
22 463 survey affected the perceived cardiovascular symptoms. Finally, other environmental  
23  
24 464 factors, such as temperature, food supplies, medical facilities may also affect  
25  
26 465 cardiovascular problems (38, 39). These information were not collected in the present  
27  
28 466 study. The potential associations observed in this study will be investigated over an  
29  
30 467 extended period.  
31  
32

33  
34 468 In conclusion, the present study was the first to identify a relationship between lower  
35  
36 469 socioeconomic status due to the earthquake with exacerbated cardiovascular  
37  
38 470 symptoms among evacuees after the Great East Japan Earthquake. Our findings will  
39  
40 471 inform future periodic health examinations and health guidelines for evacuees.  
41

42  
43 472

#### 44 473 **Acknowledgements**

45  
46 474 This Survey was conducted as part of Fukushima Prefecture's post-disaster recovery  
47  
48 475 plans and supported by the national 'Health Fund for Children and Adults Affected by the  
49  
50 476 Nuclear Incident.  
51

#### 52 477 **Contributors**

1  
2  
3  
4  
5  
6 478 WZ and TO designed the study. TO, SY, MM, MH, NH, YS, HY, MH, HT and AO were  
7  
8 479 responsible for the data collection and overseeing study procedures. The analyses was  
9  
10 480 conducted by WZ and TO. The manuscript was made by WZ. All the authors did contribution  
11  
12 481 to the revision of the manuscript. All the authors read and approved the final version of the  
13  
14 482 manuscript.  
15  
16  
17 483

#### 18 484 **Funding**

19  
20  
21 485 This survey was conducted as part of Fukushima Prefecture's post-disaster recovery plans  
22  
23 486 and was supported by the national 'Health Fund for Children and Adults Affected by the  
24  
25 487 Nuclear Incident'.  
26  
27 488

#### 28 29 489 **Declaration of interests**

30  
31  
32 490 We declare that we have no competing interests.  
33  
34 491

#### 35 36 492 **Patient consent**

37  
38 493 Obtained.  
39  
40 494

#### 41 42 495 **Data sharing statement**

43  
44 496 No additional data are available.  
45  
46 497  
47  
48 498  
49  
50 499  
51  
52 500  
53  
54 501  
55  
56  
57  
58  
59  
60

502 **References**

- 503 1. Yasumura S, Hosoya M, Yamashita S, Kamiya K, Abe M, Akashi M, Kodama K,  
504 Ozasa K; Fukushima Health Management Survey Group. Study protocol for the  
505 Fukushima Health Management Survey. *J Epidemiol.* 2012; 22: 375-383.
- 506 2. Nozaki E, Nakamura A, Abe A, Kagaya Y, Kohzu K, Sato K, Nakajima S, Fukui S,  
507 Endo H, Takahashi T, Seki H, Tamaki K, Mochizuki I. Occurrence of cardiovascular  
508 events after 2011 Great East Japan Earthquake and tsunami disaster. *Int Heart J.*  
509 2013; 54: 247-253.
- 510 3. Trevisan M, Celentano E, Meucci C, Farinaro E, Jossa F, Krogh V, Giumetti D,  
511 Panico S, Scottoni A, Mancini M. Short-term effect of natural disasters on coronary  
512 heart disease risk factors. *Arteriosclerosis.* 1986; 6: 491-494.
- 513 4. Kario K, McEwen BS, Pickering TG. Disasters and the heart: a review of the effects of  
514 earthquake-induced stress on cardiovascular disease. *Hypertens Res.* 2003;  
515 26:355-367.
- 516 5. Kario K, Matsuo T, Kayaba K, Soukejima S, Kagamimori S, Shimada K.  
517 Earthquake-induced cardiovascular disease and related risk factors in focusing on  
518 the Great Hanshin-Awaji Earthquake. *J Epidemiol.* 1998; 8:131-139.
- 519 6. Kario K, Matsuo T. Increased incidence of cardiovascular attacks in the epicenter just  
520 after the Hanshin-Awaji earthquake. *Thromb Haemost.* 1995; 74: 1207.
- 521 7. Kario K, Matsuo T, Kobayashi H, Yamamoto K, Shimada K. Earthquake-induced  
522 potentiation of acute risk factors in hypertensive elderly patients: possible triggering



- 1  
2  
3  
4  
5  
6 523 of cardiovascular events after a major earthquake. *J Am Coll Cardiol.* 1997; 29:  
7  
8 524 926-933.  
9  
10 525 8. Kario K, Matsuo T, Shimada K, Pickering TG. Factors associated with the occurrence  
11  
12 526 and magnitude of earthquake-induced increases in blood pressure. *Am J Med.*  
13  
14 527 2001; 111: 379-384.  
15  
16  
17 528 9. Suzuki S, Sakamoto S, Miki T, Matsuo T. Hanshin-Awaji earthquake and acute  
18  
19 529 myocardial infarction [letter]. *Lancet.* 1995; 345: 981.  
20  
21  
22 530 10. Itabashi R, Furui E, Sato S, Yazawa Y, Kawata K, Mori E. Incidence of cardioembolic  
23  
24 531 stroke including paradoxical brain embolism in patients with acute ischemic stroke  
25  
26 532 before and after the Great East Japan Earthquake. *Cerebrovasc Dis.* 2014;  
27  
28 533 37:431-437.  
29  
30  
31 534 11 Suzuki H, Ohira T, Takeishi Y, Hosoya M, Yasumura S, Satoh H, Kawasaki  
32  
33 535 Y4, Takahashi A, Sakai A, Ohtsuru A, Kobashi G, Ozasa K, Yamashita S, Kamiya K,  
34  
35 536 Abe M; Fukushima Health Management Survey Group. Increased prevalence of  
36  
37 537 atrial fibrillation after the Great East Japan Earthquake: Results from the Fukushima  
38  
39 538 Health Management Survey. *Int J Cardiol.* 2015; 198: 102-105.  
40  
41  
42 539 12. Aoki T, Takahashi J, Fukumoto Y, Yasuda S, Ito K, Miyata S, Shinozaki T, Inoue K, Yagi  
43  
44 540 T, Komaru T, Katahira Y, Obata A, Hiramoto T, Sukegawa H, Ogata K, Shimokawa H.  
45  
46 541 Effect of the Great East Japan earthquake on Cardiovascular Diseases. *Circ J.*  
47  
48 542 2013; 77: 490-493.  
49  
50  
51 543 13. Aoki T, Fukumoto Y, Yasuda S, Sakata Y, Ito K, Takahashi J, Miyata S, Tsuji I,  
52  
53 544 Shimokawa H. The Great East Japan Earthquake Disaster and cardiovascular  
54  
55 545 diseases. *Eur Heart J.* 2012; 33:2796-2803.  
56  
57  
58  
59  
60

- 1  
2  
3  
4  
5  
6 546 14. Yamauchi H, Yoshihisa A, Iwaya S, Owada T, Sato T, Suzuki S, Yamaki T, Sugimoto  
7  
8 547 K, Kunii H, Nakazato K, Suzuki H, Saitoh S, Takeishi Y. Clinical Features of Patients  
9  
10 548 With Decompensated Heart Failure After the Great East Japan Earthquake. *Am J*  
11  
12 549 *Cardiol.* 2013; 112: 94-99.
- 14  
15 550 15. Yabe H, Suzuki Y, Mashiko H, Nakayama Y, Hisata M, Niwa S, Yasumura S,  
16  
17 551 Yamashita S, Kamiya K, Abe M. Psychological distress after the great East Japan  
18  
19 552 earthquake and Fukushima Daiichi nuclear power plant accident: results of a mental  
20  
21 553 health and lifestyle survey through the Fukushima health management survey in  
22  
23 554 FY2011 and FY2012. *Fukushima J Med Sci.* 2014; 60:57-67.
- 26  
27 555 16. Blanchard EB, Jones-Alexander J, Buckley TC, Forneris CA. Psychometric  
28  
29 556 properties of the PTSD Checklist (PCL). *Behav Res Ther.* 1996; 34: 669-673.
- 31  
32 557 17. Furukawa TA, Kessler RC, Slade T, Andrews G. The performance of the K6 and  
33  
34 558 K10 screening scales for psychological distress in the Australian National Survey of  
35  
36 559 Mental Health and Well-Being. *Psychol Med.* 2003; 33:357-362.
- 37  
38 560 18. Sakurai K, Nishi A, Kondo K, Yanagida K, Kawakami N. Screening performance of  
39  
40 561 K6/K10 and other screening instruments for mood and anxiety disorders in Japan.  
41  
42 562 *Psychiatry Clin Neurosci.* 2011; 65:434-441.
- 44  
45 563 19. Weathers FW, Litz BT, Herman DS, Huska JA, Keane TM. The PTSD checklist  
46  
47 564 (OCL): Reliability, Validity, and Diagnostic Utility. Paper presented at the Annual  
48  
49 565 Meeting of the International Society for Traumatic Stress Studies, San Antonio, TX.  
50  
51 566 1993.
- 53  
54 567 20 Pickering TG. Mental stress as a causal factor in the development of hypertension  
55  
56 568 and cardiovascular disease. *Curr Hypertens Rep.* 2001; 3: 249-254.

- 1  
2  
3  
4  
5  
6 569 21. Kabutoya T, Kario K. Earthquake and blood pressure. *Hypertens Res.* 2009;  
7  
8 570 32:732-734.  
9  
10 571 22. Kario K. Disaster hypertension- its characteristics, mechanism, and management.  
11  
12 572 *Circ J.* 2012; 76: 553-552.  
13  
14  
15 573 23. Yokoyama Y, Otsuka K, Kawakami N, Kobayashi S, Ogawa A, Tannno K, Onoda T,  
16  
17 574 Yaegashi Y, Sakata K. Mental health and related factors after the Great East Japan  
18  
19 575 earthquake and tsunami. *PLoS One.* 2014; 9: e102497.  
20  
21  
22 576 24. Onose T, Nochioka K, Sakata Y, Miura M, Tadaki S, Ushigome R, Yamauchi T, Sato  
23  
24 577 K, Tsuji K, Abe R, Miyata S, Takahashi J, Shimokawa H; CHART-2 Investigators.  
25  
26 578 Predictors and prognostic impact of post-traumatic stress disorder after the great  
27  
28 579 East Japan earthquake in patients with cardiovascular disease. *Circ J.* 2015; 79:  
29  
30 580 664-667.  
31  
32  
33 581 25. Xu J, Mo L, Xu Z. A cross-sectional study on risk factors of depression severity  
34  
35 582 among survivors of the 2008 Sichuan earthquake. *Community Ment Health J.* 2013;  
36  
37 583 49: 847-856.  
38  
39  
40 584 26. Huang Y, Wong H, Tan HT. Associations between economic loss, financial strain  
41  
42 585 and the psychological status of Wenchuan earthquake survivors. *Disasters.* 2015;  
43  
44 586 39:795-810.  
45  
46  
47 587 27. Nishi N, Yoshimura E, Ishikawa-Takata K, Tsuboyama-Kasaoka N, Kubota T,  
48  
49 588 Miyachi M, Tokudome S, Yokoyama Y, Sakata K, Kobayashi S, Ogawa A.  
50  
51 589 Relationship of living conditions with dietary patterns among survivors of the great  
52  
53 590 East Japan earthquake. *J Epidemiol.* 2013; 5: 376-381.  
54  
55  
56  
57  
58  
59  
60

- 1  
2  
3  
4  
5  
6 591 28. Zhang W, Ohira T, Abe M, Kamiya K, Yamashita S, Yasumura S, Ohtsuru A,  
7  
8 592 Masaharu M, Harigane M, Horikoshi N, Suzuki Y, Yabe H, Yuuki M, Nagai M,  
9  
10 593 Takahashi H, Nakano H; Fukushima Health Management Survey Group. Evacuation  
11  
12 594 after the Great East Japan Earthquake was associated with poor dietary intake:  
13  
14 595 The Fukushima Health Management Survey. *J Epidemiol.* 2017; 27: 14-23.  
16  
17 596 29. Dorahy MJ, Rowlands A, Renouf C, Hanna D, Britt E, Carter JD. Impact of average  
18  
19 597 household income and damage exposure on post-earthquake distress and  
20  
21 598 functioning: A community study following the February 2011 Christchurch  
22  
23 599 earthquake. *Br J Psychol.* 2015; 106: 526-543.  
25  
26 600 30. Shea S, Lima J, Diez-Roux A, Jorgensen NW, McClelland RL Socioeconomic  
27  
28 601 Status and Poor Health Outcome at 10 Years of Follow-Up in the Multi-Ethnic Study  
29  
30 602 of Atherosclerosis. *PLoS One.* 2016; 11  
32  
33 603 31. Veronesi G, Tunstall-Pedoe H, Ferrario MM, Kee F, Kuulasmaa K, Chambless  
34  
35 604 LE6, Amouyel P, Arveiler D, Bobak M, Ferrieres J, Giampaoli S, Jørgensen  
36  
37 605 T, Peters A, Salomaa V, Soderberg S, Tamosiunas A, Cesana G; MORGAM Project.  
38  
39 606 Combined effect of educational status and cardiovascular risk factors on the  
40  
41 607 incidence of coronary heart disease and stroke in European cohorts: Implications for  
42  
43 608 prevention. *Eur J Prev Cardiol.* 2016 Nov 11. pii: 2047487316679521. [Epub ahead  
44  
45 609 of print]  
47  
48 610 32. Kario K, Matsuo T, Ishida T, Shimada K. 'White coat' hypertension and the  
49  
50 611 Hanshin-Awaji Earthquake. *Lancet.* 1995; 345: 1346.  
52  
53  
54  
55  
56  
57  
58  
59  
60

- 1  
2  
3  
4  
5  
6 612 33. Satoh H, Ohira T, Hosoya M, Sakai A, Watanabe T, Ohtsuru A et al. Evacuation  
7  
8 613 after the Fukushima Daiichi Nuclear Power Plant Accident Is a Cause of Diabetes:  
9  
10 614 Results from the Fukushima Health Management Survey. *J Diabetes Res.* 2015.  
11  
12  
13 615 34. Tsai CL, Chou CH, Lee PJ, Yin JH, Chen SY, Lin CC, Sung YF, Yang FC, Chung  
14  
15 616 CH, Chien WC, Tsai CK, Lee JT. The potential impact of primary headache  
16  
17 617 disorders on stroke risk. *J Headache Pain.* 2016; 17: 108.  
18  
19  
20 618 35. Hu X, Zhou Y, Zhao H, Peng C. Migraine and the risk of stroke: an updated  
21  
22 619 meta-analysis of prospective cohort studies. *Neurol Sci.* 2016 Oct 26. [Epub ahead  
23  
24 620 of print]  
25  
26  
27 621 36. Dojjiri R, Uno H, Miyashita K, Ihara M , Nagatsuka K. How Commonly Is Stroke  
28  
29 622 Found in Patients with Isolated Vertigo or Dizziness Attack? *J Stroke Cerebrovasc*  
30  
31 623 *Dis.* 2016; 25: 2549-2552.  
32  
33  
34 624 37. Haasenritter J, Stanze D, Widera G, Wilimzig C, Abu Hani M, Sonnichsen AC, Bosner  
35  
36 625 S, Rochon J, Donner-Banzhoff N. Does the patient with chest pain have a coronary  
37  
38 626 heart disease? Diagnostic value of single symptoms and signs--a meta-analysis.  
39  
40 627 *Croat Med J.* 2012; 53:432-441.  
41  
42  
43 628 38. Sun Z. Cardiovascular responses to cold exposure. *Front Biosci (Elite Ed).* 2010; 2:  
44  
45 629 495-503.  
46  
47  
48 630 39. Nakamura M, Tanaka F, Nakajima S, Honma M, Sakai T, Kawakami M, Endo H,  
49  
50 631 Onodera M, Niiyama M, Komatsu T, Sakamaki K, Onoda T, Sakata K, Morino Y,  
51  
52 632 Takahashi T, Makita S. Comparison of the incidence of acute decompensated heart  
53  
54 633 failure before and after the major tsunami in Northeast Japan. *Am J Cardiol.* 2012;  
55  
56 634 110:1856-1860.  
57  
58  
59  
60

1  
2  
3  
4  
5  
6  
7  
8  
9  
10  
11  
12  
13  
14  
15  
16  
17  
18  
19  
20  
21  
22  
23  
24  
25  
26  
27  
28  
29  
30  
31  
32  
33  
34  
35  
36  
37  
38  
39  
40  
41  
42  
43  
44  
45  
46  
47  
48  
49  
50  
51  
52  
53  
54  
55  
56  
57  
58  
59  
60

635

For peer review only

636 Table 1. Characteristics of survey participants and correlated incidence of exacerbation of cardiovascular related symptoms.

637

638

639

|                                       | Exacerbation of<br>headache | Exacerbation of<br>dizziness | Exacerbation of<br>palpitation | Exacerbation of<br>shortness of breath |
|---------------------------------------|-----------------------------|------------------------------|--------------------------------|----------------------------------------|
|                                       | No. (%)                     | No. (%)                      | No. (%)                        | No. (%)                                |
| <b>Sex</b>                            |                             |                              |                                |                                        |
| Men                                   | 466 (1.4)                   | 341 (1.1)                    | 277 (0.9)                      | 257 (0.8)                              |
| Women                                 | 1,427 (3.5)                 | 888 (2.2)                    | 808 (2.0)                      | 369 (0.9)                              |
| <b>Age</b>                            |                             |                              |                                |                                        |
| 20-49                                 | 966 (3.9)                   | 507 (2.0)                    | 407 (1.6)                      | 147 (0.6)                              |
| 50-64                                 | 514 (2.4)                   | 302 (1.4)                    | 323 (1.5)                      | 159 (0.8)                              |
| >=65                                  | 413 (1.4)                   | 420 (1.6)                    | 355 (1.3)                      | 320 (0.4)                              |
| <b>Mental Health Status</b>           |                             |                              |                                |                                        |
| K6<13                                 | 1,092 (1.7)                 | 695 (1.1)                    | 562 (0.9)                      | 355 (0.6)                              |
| K6>=13                                | 801 (8.9)                   | 534 (5.3)                    | 523 (5.2)                      | 271 (2.7)                              |
| <b>Post Traumatic Stress Disorder</b> |                             |                              |                                |                                        |
| No                                    | 1,062 (1.7)                 | 653 (1.0)                    | 542 (0.9)                      | 323 (0.5)                              |
| Yes                                   | 831 (8.0)                   | 576 (5.5)                    | 543 (5.2)                      | 303 (2.9)                              |
| <b>Smoking Status</b>                 |                             |                              |                                |                                        |
| Never-smoker                          | 1,104 (2.7)                 | 715 (1.8)                    | 653 (1.6)                      | 318 (0.8)                              |
| Ex-smoker                             | 338 (2.1)                   | 226 (1.4)                    | 214 (1.4)                      | 171 (1.1)                              |

1  
2  
3  
4  
5  
6  
7  
8  
9  
10  
11  
12  
13  
14  
15  
16  
17  
18  
19  
20  
21  
22  
23  
24  
25  
26  
27  
28  
29  
30  
31  
32  
33  
34  
35  
36  
37  
38  
39  
40  
41  
42  
43  
44  
45  
46  
47  
48  
49

|                              |             |             |             |           |
|------------------------------|-------------|-------------|-------------|-----------|
| Current smoker               | 403 (2.8)   | 258 (1.8)   | 196 (1.3)   | 123 (0.8) |
| <b>Drinking Status</b>       |             |             |             |           |
| Never-drinker                | 1,067 (2.9) | 674 (1.8)   | 597 (1.6)   | 323 (0.9) |
| Ex-drinker                   | 80 (2.9)    | 63 (2.3)    | 61 (2.2)    | 41 (1.5)  |
| Current drinker              | 715 (2.3)   | 463 (1.5)   | 407 (1.3)   | 248 (0.8) |
| <b>Physical activity</b>     |             |             |             |           |
| >= once per day              | 179 (1.7)   | 131 (1.2)   | 96 (0.9)    | 69 (0.7)  |
| 2-4 times per week           | 309 (2.2)   | 245 (1.7)   | 195 (1.4)   | 123 (0.9) |
| Once per week                | 234 (2.4)   | 143 (1.4)   | 139 (1.4)   | 97 (1.0)  |
| Never                        | 1144 (3.2)  | 687 (1.9)   | 637 (1.8)   | 325 (0.9) |
| <b>Hypertension History</b>  |             |             |             |           |
| No                           | 1,216 (2.8) | 667 (1.6)   | 584 (1.4)   | 276 (0.6) |
| Yes                          | 677 (2.2)   | 562 (1.8)   | 501 (1.6)   | 350 (1.1) |
| <b>Stroke History</b>        |             |             |             |           |
| No                           | 1,799 (2.6) | 1,146 (1.7) | 1,799 (1.5) | 576 (0.8) |
| Yes                          | 94 (2.4)    | 83 (2.2)    | 94 (1.6)    | 50 (1.3)  |
| <b>Heart Disease History</b> |             |             |             |           |
| No                           | 1,691 (2.6) | 1,025 (1.6) | 1,691 (2.6) | 432 (0.7) |
| Yes                          | 202 (10.7)  | 204 (2.8)   | 202 (4.0)   | 194 (2.7) |
| <b>Unemployment</b>          |             |             |             |           |
| No                           | 1,293 (2.2) | 874 (1.5)   | 790 (1.4)   | 470 (0.8) |
| Yes                          | 600 (4.2)   | 355 (2.5)   | 295 (2.1)   | 156 (1.1) |
| <b>Decreased income</b>      |             |             |             |           |



|                                                       |             |           |           |           |
|-------------------------------------------------------|-------------|-----------|-----------|-----------|
| No                                                    | 1,432 (2.4) | 968 (1.6) | 870 (1.4) | 506 (0.8) |
| Yes                                                   | 461 (3.6)   | 261 (2.0) | 215 (1.7) | 120 (0.9) |
| <b>Living arrangement</b>                             |             |           |           |           |
| Evacuation Shelter Temporary housing                  | 213 (2.5)   | 12 (1.6)  | 5 (0.7)   | 5 (0.7)   |
| Rental house, apartment                               | 195 (2.8)   | 134 (1.9) | 89 (1.3)  | 81 (1.2)  |
| Relatives' home                                       | 796 (3.5)   | 489 (2.1) | 421 (1.8) | 224 (1.0) |
| Own home                                              | 78 (2.8)    | 53 (1.9)  | 209 (1.0) | 108 (0.5) |
|                                                       | 292 (1.4)   | 199 (0.9) | 45 (1.6)  | 29 (1.0)  |
| <b>Tsunami experience</b>                             |             |           |           |           |
| No                                                    | 1,424 (2.4) | 908 (1.6) | 830 (1.4) | 458 (0.8) |
| Yes                                                   | 469 (3.2)   | 321 (2.2) | 255 (1.7) | 168 (1.1) |
| <b>Experience of the nuclear power plant accident</b> |             |           |           |           |
| No                                                    | 717 (2.1)   | 426 (1.2) | 358 (1.0) | 201 (0.6) |
| Yes                                                   | 1,176 (3.1) | 803 (2.1) | 727 (1.9) | 425 (1.1) |
| <b>Damage of house</b>                                |             |           |           |           |
| No                                                    | 413 (2.2)   | 258 (1.4) | 233 (1.3) | 103 (0.6) |
| A part of                                             | 911 (2.4)   | 600 (1.6) | 559 (1.5) | 347 (0.9) |
| Half                                                  | 184 (3.5)   | 129 (2.5) | 83 (1.6)  | 55 (1.1)  |
| More than a half                                      | 67 (3.4)    | 48 (2.5)  | 38 (1.9)  | 23 (1.2)  |
| Totally                                               | 126 (3.3)   | 86 (2.2)  | 66 (1.7)  | 43 (1.1)  |
| <b>Loss of family member</b>                          |             |           |           |           |
| No                                                    | 552 (3.9)   | 363 (2.6) | 296 (2.1) | 199 (1.4) |

1  
2  
3  
4  
5  
6  
7  
8  
9  
10  
11  
12  
13  
14  
15  
16  
17  
18  
19  
20  
21  
22  
23  
24  
25  
26  
27  
28  
29  
30  
31  
32  
33  
34  
35  
36  
37  
38  
39  
40  
41  
42  
43  
44  
45  
46  
47  
48  
49

|     |                          |             |           |           |           |
|-----|--------------------------|-------------|-----------|-----------|-----------|
| 640 | Yes                      | 1,291 (2.3) | 825 (1.5) | 759 (1.3) | 404 (0.7) |
| 641 | <b>Educational years</b> |             |           |           |           |
| 642 | <12 years (reference)    | 352 (1.9)   | 265 (1.4) | 223 (1.2) | 202 (1.1) |
| 643 | >=12 years               | 1,471 (2.9) | 916 (1.8) | 822 (1.6) | 397 (0.8) |

For peer review only

Table 2. Odds ratios (OR) and 95% CIs for cardiovascular related symptoms on multiple logistic regression analyses

|                           |                                 | Exacerbation of Headache |                        |                                |                                  |
|---------------------------|---------------------------------|--------------------------|------------------------|--------------------------------|----------------------------------|
|                           |                                 | OR(95%CI) <sup>a</sup>   | OR(95%CI) <sup>b</sup> | OR(95%CI) for men <sup>b</sup> | OR(95%CI) for women <sup>b</sup> |
| <b>living arrangement</b> | <b>Own home (Reference)</b>     | 1.00(reference)          | 1.00(reference)        | 1.00(reference)                | 1.00(reference)                  |
|                           | Relatives' home                 | 2.03 (1.58-2.62)         | 1.58 (1.19-2.09)       | 1.95 (1.11-2.57)               | 1.46 (1.06-2.02)                 |
|                           | Rental house, apartment         | 2.21 (1.93-2.54)         | 1.54 (1.32-1.80)       | 1.83 (1.34-2.53)               | 1.46 (1.22-1.75)                 |
|                           | Evacuation Shelter              | 2.01 (1.24-3.25)         | 1.80 (1.09-2.96)       | 2.24 (0.99-5.16)               | 1.61 (0.85-3.03)                 |
|                           | Temporary housing               | 2.13 (1.77-2.56)         | 1.42 (1.15-1.72)       | 1.69 (1.11-3.43)               | 1.36 (1.06-1.73)                 |
| <b>Unemployment</b>       | <b>No (reference)</b>           | 1.00(reference)          | 1.00(reference)        | 1.00(reference)                | 1.00(reference)                  |
|                           | Yes                             | 1.70 (1.53-1.88)         | 1.28 (1.12-1.46)       | 1.36 (1.04-1.78)               | 1.26 (1.09-1.47)                 |
| <b>Decreased income</b>   | <b>No (reference)</b>           | 1.00(reference)          | 1.00(reference)        | 1.00(reference)                | 1.00(reference)                  |
|                           | Yes                             | 1.56 (1.40-1.74)         | 1.39 (1.22-1.60)       | 1.39 (1.08-1.78)               | 1.39 (1.17-1.63)                 |
| <b>Educational years</b>  | <b>&lt;12 years (reference)</b> | 1.00(reference)          | 1.00(reference)        | 1.00(reference)                | 1.00(reference)                  |
|                           | >=12 years                      | 1.02 (0.89-1.16)         | 1.04 (0.81-1.63)       | 1.25 (0.91-1.73)               | 0.97 (0.80-1.17)                 |

1  
2  
3  
4  
5  
6  
7  
8  
9  
10  
11  
12  
13  
14  
15  
16  
17  
18  
19  
20  
21  
22  
23  
24  
25  
26  
27  
28  
29  
30  
31  
32  
33  
34  
35  
36  
37  
38  
39  
40  
41  
42  
43  
44  
45  
46  
47  
48  
49

## Exacerbation of Dizziness

|                           |                                 | OR(95%CI) <sup>a</sup> | OR(95%CI) <sup>b</sup> | OR(95%CI) for men <sup>b</sup> | OR(95%CI) <sup>f</sup> for women <sup>b</sup> |
|---------------------------|---------------------------------|------------------------|------------------------|--------------------------------|-----------------------------------------------|
| <b>living arrangement</b> | <b>Own home (Reference)</b>     | 1.00(reference)        | 1.00(reference)        | 1.00(reference)                | 1.00(reference)                               |
|                           | Relatives' home                 | 1.98 (1.46-2.69)       | 1.42 (1.02-1.98)       | 0.96 (0.49-1.91)               | 1.66 (1.13-2.43)                              |
|                           | Rental house, apartment         | 2.27 (1.91-2.69)       | 1.45 (1.20-1.75)       | 1.28 (0.92-1.79)               | 1.55 (1.23-1.96)                              |
|                           | Evacuation Shelter              | 1.84 (1.02-3.32)       | 1.39 (0.74-2.59)       | 0.85 (0.26-2.77)               | 1.83 (0.87-3.84)                              |
| <b>Unemployment</b>       | Temporary housing               | 2.09 (1.68-2.61)       | 1.40 (1.09-1.79)       | 1.51 (1.00-2.28)               | 1.36 (1.00-1.85)                              |
|                           | <b>No (reference)</b>           | 1.00(reference)        | 1.00(reference)        | 1.00(reference)                | 1.00(reference)                               |
| <b>Decreased income</b>   | Yes                             | 1.65 (1.45-1.87)       | 1.26 (1.07-1.48)       | 1.27 (0.94-1.73)               | 1.20 (0.98-1.45)                              |
|                           | <b>No (reference)</b>           | 1.00(reference)        | 1.00(reference)        | 1.00(reference)                | 1.00(reference)                               |
| <b>Educational years</b>  | Yes                             | 1.37 (1.19-1.57)       | 1.18 (0.99-1.40)       | 1.12 (0.83-1.51)               | 1.22 (0.98-1.51)                              |
|                           | <b>&lt;12 years (reference)</b> | 1.00(reference)        | 1.00(reference)        | 1.00(reference)                | 1.00(reference)                               |
|                           | >=12 years                      | 1.17 (1.01-1.37)       | 1.13 (0.94-1.36)       | 1.08 (0.80-1.47)               | 1.14 (0.90-1.44)                              |

## Exacerbation of Palpitation

|                           |                                 | OR(95%CI) <sup>a</sup> | OR(95%CI) <sup>b</sup> | OR(95%CI) for men <sup>b</sup> | OR(95%CI) for women <sup>b</sup> |
|---------------------------|---------------------------------|------------------------|------------------------|--------------------------------|----------------------------------|
| <b>living arrangement</b> | <b>Own home (Reference)</b>     | 1.00(reference)        | 1.00(reference)        | 1.00(reference)                | 1.00(reference)                  |
|                           | Relatives' home                 | 1.70 (1.23-2.34)       | 1.23 (0.87-1.74)       | 1.25 (0.57-2.71)               | 1.21 (0.82-1.78)                 |
|                           | Rental house, apartment         | 1.90 (1.60-2.25)       | 1.25 (1.03-1.51)       | 1.73 (1.17-2.53)               | 1.11 (0.89-1.39)                 |
|                           | Evacuation Shelter              | 0.74 (0.30-1.80)       | 0.51 (0.19-1.39)       | 0.93 (0.22-3.92)               | 0.35 (0.09-1.45)                 |
|                           | Temporary housing               | 1.32 (1.03-1.69)       | 0.82 (0.62-1.10)       | 1.19 (0.69-2.04)               | 0.72 (0.51-1.01)                 |
| <b>Unemployment</b>       | <b>No (reference)</b>           | 1.00(reference)        | 1.00(reference)        | 1.00(reference)                | 1.00(reference)                  |
|                           | Yes                             | 1.46 (1.27-1.68)       | 1.21 (1.01-1.45)       | 1.29 (0.91-1.83)               | 1.20 (0.97-1.48)                 |
| <b>Decreased income</b>   | <b>No (reference)</b>           | 1.00(reference)        | 1.00(reference)        | 1.00(reference)                | 1.00(reference)                  |
|                           | Yes                             | 1.24 (1.07-1.44)       | 1.14 (0.94-1.38)       | 1.46 (1.05-2.03)               | 1.00 (0.80-1.28)                 |
| <b>Educational years</b>  | <b>&lt;12 years (reference)</b> | 1.00(reference)        | 1.00(reference)        | 1.00(reference)                | 1.00(reference)                  |
|                           | >=12 years                      | 1.28 (1.09-1.50)       | 1.14 (0.93-1.39)       | 1.15 (0.79-1.67)               | 1.00 (0.81-1.23)                 |

Exacerbation of Shortness of Breath

|                           |                                 | OR(95%CI) <sup>a</sup> | OR(95%CI) <sup>b</sup> | OR(95%CI) for men <sup>b</sup> | OR(95%CI) for women <sup>b</sup> |
|---------------------------|---------------------------------|------------------------|------------------------|--------------------------------|----------------------------------|
| <b>living arrangement</b> | <b>Own home (Reference)</b>     | 1.00(reference)        | 1.00(reference)        | 1.00(reference)                | 1.00(reference)                  |
|                           | Relatives' home                 | 1.60 (1.02-2.52)       | 1.16 (0.71-1.90)       | 0.95 (0.42-2.16)               | 1.33 (0.72-2.63)                 |
|                           | Rental house, apartment         | 2.34 (1.85-2.96)       | 1.76 (1.35-2.28)       | 1.50 (1.01-2.22)               | 1.98 (1.39-2.81)                 |
|                           | Evacuation Shelter              | 1.33 (0.54-3.27)       | 1.20 (0.48-3.00)       | 1.73 (0.60-4.95)               | 0.52 (0.07-3.79)                 |
|                           | Temporary housing               | 2.29 (1.72-3.06)       | 1.49 (1.07-2.08)       | 1.25 (0.75-2.09)               | 1.72 (1.10-2.68)                 |
| <b>Unemployment</b>       | <b>No (reference)</b>           | 1.00(reference)        | 1.00(reference)        | 1.00(reference)                | 1.00(reference)                  |
|                           | Yes                             | 1.55 (1.29-1.87)       | 1.13 (0.89-1.44)       | 1.06 (0.73-1.55)               | 1.17 (0.85-1.60)                 |
| <b>Decreased income</b>   | <b>No (reference)</b>           | 1.00(reference)        | 1.00(reference)        | 1.00(reference)                | 1.00(reference)                  |
|                           | Yes                             | 1.24 (1.01-1.52)       | 1.14 (0.89-1.47)       | 1.18 (0.83-1.69)               | 1.10 (0.77-1.57)                 |
| <b>Educational years</b>  | <b>&lt;12 years (reference)</b> | 1.00(reference)        | 1.00(reference)        | 1.00(reference)                | 1.00(reference)                  |
|                           | >=12 years                      | 0.94 (0.78-1.13)       | 0.84 (0.67-1.06)       | 0.76 (0.54-1.07)               | 0.90 (0.66-1.23)                 |

a. Adjusted for age and sex.

b. Further adjusted for drinking status (once or more per month, ex-drinker, less than once per month), smoking status (non-smoker, ex-smoker, current smoker), mental health distress (K6<3, K6>=13), hypertension history (yes or no), stroke history (yes or no), heart disease history (yes or no), physical activities (>= once per day, 2-4 times per week, once per week, never), tsunami experience (yes or no), radiation experience (yes or no), damage of house (no, a part of, half, more than a half, totally), loss of family member (yes or no).

## STROBE Statement—checklist of items that should be included in reports of observational studies

|                                    | Item No | Recommendation                                                                                                                                                                                                                                                                                                                                                                                                                                                                                                                                                                                                                                                                                   |
|------------------------------------|---------|--------------------------------------------------------------------------------------------------------------------------------------------------------------------------------------------------------------------------------------------------------------------------------------------------------------------------------------------------------------------------------------------------------------------------------------------------------------------------------------------------------------------------------------------------------------------------------------------------------------------------------------------------------------------------------------------------|
| <b>Title and abstract (P1-4)</b>   | 1       | (a) Indicate the study's design with a commonly used term in the title or the abstract<br>(b) Provide in the abstract an informative and balanced summary of what was done and what was found                                                                                                                                                                                                                                                                                                                                                                                                                                                                                                    |
| <b>Introduction (P6-7)</b>         |         |                                                                                                                                                                                                                                                                                                                                                                                                                                                                                                                                                                                                                                                                                                  |
| Background/rationale (P6)          | 2       | Explain the scientific background and rationale for the investigation being reported                                                                                                                                                                                                                                                                                                                                                                                                                                                                                                                                                                                                             |
| Objectives (P7)                    | 3       | State specific objectives, including any prespecified hypotheses                                                                                                                                                                                                                                                                                                                                                                                                                                                                                                                                                                                                                                 |
| <b>Methods (P7-11)</b>             |         |                                                                                                                                                                                                                                                                                                                                                                                                                                                                                                                                                                                                                                                                                                  |
| Study design (P7)                  | 4       | Present key elements of study design early in the paper                                                                                                                                                                                                                                                                                                                                                                                                                                                                                                                                                                                                                                          |
| Setting (P7)                       | 5       | Describe the setting, locations, and relevant dates, including periods of recruitment, exposure, follow-up, and data collection                                                                                                                                                                                                                                                                                                                                                                                                                                                                                                                                                                  |
| Participants (P7)                  | 6       | (a) <i>Cohort study</i> —Give the eligibility criteria, and the sources and methods of selection of participants. Describe methods of follow-up<br><i>Case-control study</i> —Give the eligibility criteria, and the sources and methods of case ascertainment and control selection. Give the rationale for the choice of cases and controls<br><i>Cross-sectional study</i> —Give the eligibility criteria, and the sources and methods of selection of participants<br>(b) <i>Cohort study</i> —For matched studies, give matching criteria and number of exposed and unexposed<br><i>Case-control study</i> —For matched studies, give matching criteria and the number of controls per case |
| Variables (P8-P10)                 | 7       | Clearly define all outcomes, exposures, predictors, potential confounders, and effect modifiers. Give diagnostic criteria, if applicable                                                                                                                                                                                                                                                                                                                                                                                                                                                                                                                                                         |
| Data sources/ measurement (P8-P10) | 8*      | For each variable of interest, give sources of data and details of methods of assessment (measurement). Describe comparability of assessment methods if there is more than one group                                                                                                                                                                                                                                                                                                                                                                                                                                                                                                             |
| Bias (None)                        | 9       | Describe any efforts to address potential sources of bias                                                                                                                                                                                                                                                                                                                                                                                                                                                                                                                                                                                                                                        |
| Study size (P7-8)                  | 10      | Explain how the study size was arrived at                                                                                                                                                                                                                                                                                                                                                                                                                                                                                                                                                                                                                                                        |
| Quantitative variables (P8-10)     | 11      | Explain how quantitative variables were handled in the analyses. If applicable, describe which groupings were chosen and why                                                                                                                                                                                                                                                                                                                                                                                                                                                                                                                                                                     |
| Statistical methods (P10-11)       | 12      | (a) Describe all statistical methods, including those used to control for confounding<br>(b) Describe any methods used to examine subgroups and interactions<br>(c) Explain how missing data were addressed<br>(d) <i>Cohort study</i> —If applicable, explain how loss to follow-up was addressed<br><i>Case-control study</i> —If applicable, explain how matching of cases and controls was addressed<br><i>Cross-sectional study</i> —If applicable, describe analytical methods taking account of sampling strategy<br>(e) Describe any sensitivity analyses                                                                                                                                |

Continued on next page

**Results (P11-14)**

|                           |     |                                                                                                                                                                                                                                                                                                                                                                                                               |
|---------------------------|-----|---------------------------------------------------------------------------------------------------------------------------------------------------------------------------------------------------------------------------------------------------------------------------------------------------------------------------------------------------------------------------------------------------------------|
| Participants (P11-12)     | 13* | (a) Report numbers of individuals at each stage of study—eg numbers potentially eligible, examined for eligibility, confirmed eligible, included in the study, completing follow-up, and analysed<br>(b) Give reasons for non-participation at each stage<br>(c) Consider use of a flow diagram                                                                                                               |
| Descriptive data (P11-13) | 14* | (a) Give characteristics of study participants (eg demographic, clinical, social) and information on exposures and potential confounders<br>(b) Indicate number of participants with missing data for each variable of interest<br>(c) <i>Cohort study</i> —Summarise follow-up time (eg, average and total amount)                                                                                           |
| Outcome data (P11)        | 15* | <i>Cohort study</i> —Report numbers of outcome events or summary measures over time<br><i>Case-control study</i> —Report numbers in each exposure category, or summary measures of exposure<br><i>Cross-sectional study</i> —Report numbers of outcome events or summary measures                                                                                                                             |
| Main results (P13-14)     | 16  | (a) Give unadjusted estimates and, if applicable, confounder-adjusted estimates and their precision (eg, 95% confidence interval). Make clear which confounders were adjusted for and why they were included<br>(b) Report category boundaries when continuous variables were categorized<br>(c) If relevant, consider translating estimates of relative risk into absolute risk for a meaningful time period |
| Other analyses<br>None    | 17  | Report other analyses done—eg analyses of subgroups and interactions, and sensitivity analyses                                                                                                                                                                                                                                                                                                                |

**Discussion (P14-20)**

|                           |    |                                                                                                                                                                            |
|---------------------------|----|----------------------------------------------------------------------------------------------------------------------------------------------------------------------------|
| Key results (P14-20)      | 18 | Summarise key results with reference to study objectives                                                                                                                   |
| Limitations (P18-20)      | 19 | Discuss limitations of the study, taking into account sources of potential bias or imprecision. Discuss both direction and magnitude of any potential bias                 |
| Interpretation (P14-18)   | 20 | Give a cautious overall interpretation of results considering objectives, limitations, multiplicity of analyses, results from similar studies, and other relevant evidence |
| Generalisability (P19-20) | 21 | Discuss the generalisability (external validity) of the study results                                                                                                      |

**Other information (P20)**

|               |    |                                                                                                                                                               |
|---------------|----|---------------------------------------------------------------------------------------------------------------------------------------------------------------|
| Funding (P20) | 22 | Give the source of funding and the role of the funders for the present study and, if applicable, for the original study on which the present article is based |
|---------------|----|---------------------------------------------------------------------------------------------------------------------------------------------------------------|

\*Give information separately for cases and controls in case-control studies and, if applicable, for exposed and unexposed groups in cohort and cross-sectional studies.

**Note:** An Explanation and Elaboration article discusses each checklist item and gives methodological background and published examples of transparent reporting. The STROBE checklist is best used in conjunction with this article (freely available on the Web sites of PLoS Medicine at <http://www.plosmedicine.org/>, Annals of Internal Medicine at <http://www.annals.org/>, and Epidemiology at <http://www.epidem.com/>). Information on the STROBE Initiative is available at [www.strobe-statement.org](http://www.strobe-statement.org).



# BMJ Open

## Effects of socioeconomic factors on cardiovascular related symptoms among residents in Fukushima after the Great East Japan Earthquake: A cross-sectional study using data from the Fukushima Health Management Survey

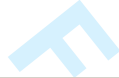

|                                 |                                                                                                                                                                                                                                                                                                                                                                                                                                                                                                                                                                                                                                                                                                                                                                                                                                                                                                                                                                                                                                                                                                                                                                                                                                                                                                                                                                                                                                                                                                                                                                                                                                                                                                                                                                                                                           |
|---------------------------------|---------------------------------------------------------------------------------------------------------------------------------------------------------------------------------------------------------------------------------------------------------------------------------------------------------------------------------------------------------------------------------------------------------------------------------------------------------------------------------------------------------------------------------------------------------------------------------------------------------------------------------------------------------------------------------------------------------------------------------------------------------------------------------------------------------------------------------------------------------------------------------------------------------------------------------------------------------------------------------------------------------------------------------------------------------------------------------------------------------------------------------------------------------------------------------------------------------------------------------------------------------------------------------------------------------------------------------------------------------------------------------------------------------------------------------------------------------------------------------------------------------------------------------------------------------------------------------------------------------------------------------------------------------------------------------------------------------------------------------------------------------------------------------------------------------------------------|
| Journal:                        | <i>BMJ Open</i>                                                                                                                                                                                                                                                                                                                                                                                                                                                                                                                                                                                                                                                                                                                                                                                                                                                                                                                                                                                                                                                                                                                                                                                                                                                                                                                                                                                                                                                                                                                                                                                                                                                                                                                                                                                                           |
| Manuscript ID                   | bmjopen-2016-014077.R3                                                                                                                                                                                                                                                                                                                                                                                                                                                                                                                                                                                                                                                                                                                                                                                                                                                                                                                                                                                                                                                                                                                                                                                                                                                                                                                                                                                                                                                                                                                                                                                                                                                                                                                                                                                                    |
| Article Type:                   | Research                                                                                                                                                                                                                                                                                                                                                                                                                                                                                                                                                                                                                                                                                                                                                                                                                                                                                                                                                                                                                                                                                                                                                                                                                                                                                                                                                                                                                                                                                                                                                                                                                                                                                                                                                                                                                  |
| Date Submitted by the Author:   | 03-Mar-2017                                                                                                                                                                                                                                                                                                                                                                                                                                                                                                                                                                                                                                                                                                                                                                                                                                                                                                                                                                                                                                                                                                                                                                                                                                                                                                                                                                                                                                                                                                                                                                                                                                                                                                                                                                                                               |
| Complete List of Authors:       | Zhang, Wen; Fukushima Medical University School of Medicine, Epidemiology<br>Ohira, Tetsuya; Fukushima Medical University, Radiation Medical Science Center for the Fukushima Health Management Survey; Fukushima Medical University School of Medicine, Epidemiology<br>Yasumura, Seiji; Fukushima Medical University<br>Maeda, Masaharu ; Fukushima Medical University, Radiation Medical Science Center for the Fukushima Health Management Survey; Fukushima Medical University School of Medicine, Disaster Psychiatry<br>Ohtsuru, Akira; Fukushima Medical University,<br>Harigane, Mayumi; Radiation Medical Science Center for the Fukushima Health Management Survey<br>Horikoshi, Naoko; Radiation Medical Science Center for the Fukushima Health Management Survey,<br>Suzuki, Yuriko; National Institute of Mental Health, National Center of Neurology and Psychiatry,<br>Yabe, Hirooki; Fukushima Medical University School of Medicine, Neuropsychiatry; Radiation Medical Science Center for the Fukushima Health Management Survey<br>Nagai, Masato<br>Nakano, Hironori ; Fukushima Medical University, Radiation Medical Science Center for the Fukushima Health Management Survey; Fukushima Medical University School of Medicine, Epidemiology<br>Hirosaki, Mayumi; Fukushima Medical University School of Medicine, Epidemiology<br>Uemura, Mayu; Fukushima Medical University School of Medicine, Epidemiology<br>Takahashi, Hideto; Fukushima Medical University School of Medicine, Information Management and Statistics Office; Fukushima Medical University School of Medicine, Radiation Medical Science Center for the Fukushima Health Management Survey<br>Kiyama, Kenji<br>Yamashita, Shunichi ; Nagasaki University School of Medicine<br>Abe, Masafumi; Fukushima Medical University, |
| <b>Primary Subject Heading</b>: | Epidemiology                                                                                                                                                                                                                                                                                                                                                                                                                                                                                                                                                                                                                                                                                                                                                                                                                                                                                                                                                                                                                                                                                                                                                                                                                                                                                                                                                                                                                                                                                                                                                                                                                                                                                                                                                                                                              |
| Secondary Subject Heading:      | Epidemiology, Sociology                                                                                                                                                                                                                                                                                                                                                                                                                                                                                                                                                                                                                                                                                                                                                                                                                                                                                                                                                                                                                                                                                                                                                                                                                                                                                                                                                                                                                                                                                                                                                                                                                                                                                                                                                                                                   |

1  
2  
3  
4  
5  
6  
7  
8  
9  
10  
11  
12  
13  
14  
15  
16  
17  
18  
19  
20  
21  
22  
23  
24  
25  
26  
27  
28  
29  
30  
31  
32  
33  
34  
35  
36  
37  
38  
39  
40  
41  
42  
43  
44  
45  
46  
47  
48  
49  
50  
51  
52  
53  
54  
55  
56  
57  
58  
59  
60

|           |                                                                                     |
|-----------|-------------------------------------------------------------------------------------|
| Keywords: | Great East Japan Earthquake, socioeconomic factors, cardiovascular related symptoms |
|           |                                                                                     |

SCHOLARONE™  
Manuscripts

For peer review only

1  
2  
3  
4  
5  
6  
7  
8  
9  
10  
11  
12  
13  
14  
15  
16  
17  
18  
19  
20  
21  
22  
23  
24  
25  
26  
27  
28  
29  
30  
31  
32  
33  
34  
35  
36  
37  
38  
39  
40  
41  
42  
43  
44  
45  
46  
47  
48  
49  
50  
51  
52  
53  
54  
55  
56  
57  
58  
59  
60

## Effects of socioeconomic factors on cardiovascular related symptoms among residents in Fukushima after the Great East Japan Earthquake: A cross-sectional study using data from the Fukushima Health Management Survey

Wen Zhang<sup>1,2</sup>, Tetsuya Ohira<sup>1,2</sup>, Seiji Yasumura<sup>1,3</sup>, Masaharu Maeda<sup>1,4</sup>, Akira Otsuru<sup>1,5</sup>, Mayumi Harigane<sup>1</sup>, Naoko Horikoshi<sup>1</sup>, Yuriko Suzuki<sup>1,6</sup>, Hirooki Yabe<sup>1,7</sup>, Masato Nagai<sup>1,2</sup>, Hironori Nakano<sup>1,2</sup>, Mayumi Hirosaki<sup>2</sup>, Mayu Uemura<sup>2</sup>, Hideto Takahashi<sup>1</sup>, Kenji Kamiya<sup>1,8</sup>, Shunichi Yamashita<sup>1,9</sup>, Masafumi Abe<sup>1</sup>, for the Fukushima Health Management Survey Group

1. Radiation Medical Science Center for the Fukushima Health Management Survey, Fukushima, Japan
2. Department of Epidemiology, School of Medicine, Fukushima Medical University, Fukushima, Japan
3. Department of Public Health, School of Medicine, Fukushima Medical University, Fukushima, Japan
4. Department of Disaster Psychiatry, School of Medicine, Fukushima Medical University, Fukushima, Japan
5. Department of Radiation Health Management, Fukushima Medical University, Fukushima, Japan
6. National Institute of Mental Health, National Center of Neurology and Psychiatry, Tokyo, Japan

- 1
- 2
- 3
- 4
- 5
- 6 7. Department of Neuropsychiatry, School of Medicine, Fukushima Medical
- 7 University, Fukushima, Japan
- 8
- 9
- 10 8. Department of Experimental Oncology, Research Institute for Radiation Biology
- 11 and Medicine, Hiroshima University, Hiroshima, Japan
- 12
- 13
- 14 9. Japan and Atomic Bomb Disease Institute, Nagasaki University, Nagasaki,
- 15 Japan
- 16
- 17
- 18
- 19
- 20
- 21
- 22
- 23
- 24

### 25 **Correspondence:**

26 Wen Zhang, PHD

27 Department of Epidemiology, School of Medicine, Fukushima Medical University, 1  
28 Hikariga-oka, Fukushima City 960-1295, JAPAN

29 Phone: +81-24-547-1343; Fax: +81-24-547-1336

30 E-mail: [zhangw09@fmu.ac.jp](mailto:zhangw09@fmu.ac.jp)

31

32

33

34

35

36

37

38

39

40

41

42

43

44

45

46

47

48

49

50

51

52

53

54

55

56

57

58

59

60

## Abstract

**Objective:** To investigate the association between socioeconomic factors and the exacerbation of cardiovascular symptoms among evacuees after the Great East Japan Earthquake.

**Methods:** A sample of 73,433 individuals were included in the Fukushima Health Management survey. Self-report questionnaires were used to determine the influence of socioeconomic factors, including living arrangement, loss of employment, and decreased income on the exacerbation of headache, dizziness, palpitations, and shortness of breath. Odds ratios (OR) and 95% confidence intervals (CIs) of the effect of socioeconomic factors were estimated for each symptom using multiple logistic regression analyses.

**Results:** Exacerbation of headaches were reported by 1,375 individuals, dizziness by 881, palpitations by 768, and shortness of breath by 434 individuals. Evacuation accommodation was associated with all of these symptoms. Compared to participants living in their own home (OR=1.00), individuals living in relatives' homes had increased probability of experiencing exacerbation of headache (1.58; 95% CI 1.20–2.09) and dizziness (1.43; 95% CI 1.02–1.98); those living in temporary housing or apartments experienced exacerbation of headache (1.55; 95% CI 1.32–1.81), dizziness (1.45; 95% CI 1.20–1.76), palpitations (1.25; 95% CI 1.03–1.51), and shortness of breath (1.75; 95% CI 1.35–2.27); participants living in evacuation shelters experienced exacerbation of headache (1.80; 95% CI 1.10–2.97); and refugees living in temporary housing also experienced exacerbation of headache (1.42; 95% CI 1.15–1.75), dizziness (1.39; 95% CI 1.08–1.78), and shortness of breath (1.50; 95% CI 1.07–2.09). Compared to the evacuees that retained their jobs, unemployed individuals showed increased probability

1  
2  
3  
4  
5  
6 of exacerbation of headache (1.28, 95% CI 1.12–1.46), dizziness (1.26, 95% CI 1.07–  
7  
8 1.48), and palpitations (1.22, 95% CI 1.02–1.46). Decreased income was associated  
9  
10 with exacerbation of headache (1.39, 95% CI 1.21–1.60).

11  
12 **Conclusion:** After the earthquake, living in non-home conditions was more likely to  
13  
14 result in exacerbated cardiovascular symptoms among evacuees. Loss of employment  
15  
16 was another risk factor related to exacerbated headache and dizziness.  
17  
18

19  
20  
21 **Keywords:** cardiovascular symptoms, Great East Japan Earthquake, socioeconomic  
22  
23 factors  
24  
25  
26  
27  
28  
29  
30  
31  
32  
33  
34  
35  
36  
37  
38  
39  
40  
41  
42  
43  
44  
45  
46  
47  
48  
49  
50  
51  
52  
53  
54  
55  
56  
57  
58  
59  
60

### Strengths and limitations of this study

- Our study is the first to identify an inverse relationship between low socioeconomic status and exacerbated cardiovascular related symptoms after the Great East Japan earthquake using a sample of 73,433 evacuees.
- The present study was based on a subjective self-response survey. Moreover, the exacerbated symptoms are not necessarily logical predictors of cardiovascular diseases.
- Overall, the response rate to questionnaires was low (40.7%) and potential sampling skews may have biased the data.
- A further limitation of the present study was that information regarding changes in family relationships (e.g. death and physical separation) among the evacuees after the disaster was not captured.
- Additionally, most questionnaires were collected over a short time period (from Jan 2012 to Mar 2012).

## Introduction

The Great East Japan Earthquake and the subsequent Fukushima Daiichi nuclear disaster, which occurred in March 2011, were together the most destructive catastrophe in Japan, to date. Due to concerns regarding released radiation, most residents in nearby towns were forced to evacuate and consequently suffered long-lasting anxiety. Shortly after the disaster, a Fukushima Health Management Survey was conducted to investigate the effects of long-term low-dose radiation exposure caused by the accident and to assess the physical and mental wellbeing of evacuees. This study included a basic survey which estimated each resident's radiation exposure and four detailed surveys: a Comprehensive Health Check, a thyroid ultrasonography, a Mental Health and Lifestyle Survey, and a survey of pregnant women and nursing mothers (1). The Mental Health and Lifestyle Survey utilized self-report questionnaires to investigate the health status and lifestyle of refugees by querying information regarding nutrition and diet, perceived symptoms of illness, disaster-related experience, and socioeconomic factors.

Several previous studies have identified changes in the incidence of cardiovascular events following disasters, however, results are conflicting (2-14). A recent study reported a heterogeneous occurrence of cardiovascular events after the Great East Japan Earthquake (2), while another study reported a significant increase in the incidence of cardioembolic stroke after the earthquake (10). However, neither study examined the incidence of perceived cardiovascular disease symptoms after a disaster, nor did they focus on the effect of refugee socioeconomic status on health problems during the evacuation period. Yet, these aspects should be considered because they



1  
2  
3  
4  
5  
6 are relevant for reviewing refugee health status, assessing the incidence of various  
7  
8 diseases, and for providing health guidelines for refugees.  
9

10  
11 Consequently, we conducted the present study to investigate the risk factors of  
12  
13 perceived cardiovascular symptoms following a major disaster. In the present study, the  
14  
15 socioeconomic factors included: the number of years of education, living arrangement,  
16  
17 change of employment, and income. Due to the particular post-disaster situation,  
18  
19 change of employment and income due to the disaster were captured instead of job and  
20  
21 income level. Thus, in the present study, fewer years of education, living in non-home  
22  
23 conditions, and unemployment or decreased income due to the disaster represented  
24  
25 decreased socioeconomic status. We hypothesized that a decrease in socioeconomic  
26  
27 status due to the earthquake would be associated with exacerbated cardiovascular  
28  
29 symptoms among evacuees.  
30  
31

## 32 33 34 **Methods**

### 35 36 **Participants**

37  
38 The primary purpose of the Fukushima Health Management Survey was to monitor  
39  
40 the long-term health and lifestyle of Fukushima residents and to provide them with  
41  
42 appropriate care (15). The Fukushima Health Management Survey consisted of a basic  
43  
44 survey and four detailed surveys, namely: a thyroid ultrasound examination,  
45  
46 Comprehensive Health Check, Mental Health and Lifestyle Survey, and pregnancy and  
47  
48 birth survey (for details of these surveys see (1)). Individuals participating in the Mental  
49  
50 Health and Lifestyle Survey were included in the present study. Briefly, the target  
51  
52 population consisted of 210,189 officially registered victims of the Great East Japan  
53  
54 Earthquake. They were evacuated from the following zones: Hirono Town, Naraha  
55  
56  
57  
58  
59  
60

1  
2  
3  
4  
5  
6 Town, Tomioka Town, Kawauchi Village, Futaba Town, Namie Town, Katsurao Village,  
7  
8 Minamisoma City, Tamura City, Yamakiya District of Kawamata Town, and Iitate Village.

9  
10 In 2012, 180,604 questionnaires were sent out, of which 73,569 were returned with  
11  
12 responses (40.7% response rate). Of the returned questionnaires, 136 were excluded  
13  
14 because they were blank or duplicated and 9,245 because they were filled in by a proxy.  
15  
16 After these exclusions, data from 73,433 individuals (32,301 men and 41,132 women)  
17  
18 were used for our analyses.  
19

20  
21 The study protocol was approved by the Ethics Committee of Fukushima Medical  
22  
23 University. Participants who returned self-administered questionnaires were considered  
24  
25 to have consented to participation in the study.  
26  
27

### 28 29 30 **Data collection and measurement**

31  
32 To investigate the health status and lifestyle of the refugees, the exacerbation of  
33  
34 headache, dizziness, palpitations, and shortness of breath was determined using a  
35  
36 self-report questionnaire. All participants were asked to answer the question 'Do you  
37  
38 have the following perceived symptoms after the earthquake?' and could choose  
39  
40 between the replies 'No', 'Yes', and 'Exacerbation'. In the present study we focused on  
41  
42 reports of 'Exacerbation'.  
43  
44

45  
46 To evaluate Posttraumatic Stress Disorder (PTSD) symptoms we used the  
47  
48 non-military version of the Posttraumatic Stress Disorder Checklist (PCL-S) (15): a  
49  
50 checklist of 17 self-reported items. The list is based on the Diagnostic and Statistical  
51  
52 Manual of Mental Disorders (4th edition, DSM-IV) criteria (16), and each item is rated  
53  
54 using a Likert-type scale from one ('not at all') to five ('extremely'). Participants were  
55  
56 requested to respond to the questions about each PTSD symptom separately and to  
57  
58

1  
2  
3  
4  
5 indicate whether they had experienced a given symptom during the past month. Based  
6  
7 on the sum of the scores of all 17 items, a total PCL-S score could range from 17 to 85  
8  
9 (15).  
10

11  
12 In addition to the PCL-S checklist, the following items were included in the  
13  
14 self-assessment and self-report questionnaires:  
15

16  
17 1. Demographic characteristics

18  
19 The demographic characteristics that were surveyed included individuals' gender,  
20  
21 age group, mental health status, history of mental illness, incidence of PTSD symptoms,  
22  
23 smoking and drinking habits, and current physical activity levels. Age groups were  
24  
25 divided into childbearing age (20–49 years), middle age (50–64 years), and old age (65  
26  
27 years and older).  
28

29  
30 Mental health status, and specifically incidence and severity of depression, was  
31  
32 measured using the Japanese version of the K6 Kessler Psychological Distress Scale,  
33  
34 which has been validated by previous studies (17, 18). For the K6 assessment,  
35  
36 participants were asked if they had experienced any of the following symptoms during  
37  
38 the past 30 days: feeling so depressed that nothing could cheer them up, feeling that  
39  
40 everything was an effort, or feeling nervous, hopeless, restless, fidgety, or worthless.  
41  
42 Each question was rated on a 5-point Likert-type scale from zero (never experienced) to  
43  
44 four (experienced all of the time), with higher scores signifying worse mental health  
45  
46 status (the range of the scores was 0–24) (15). Additionally, we assessed participants'  
47  
48 history of mental illness via a 'yes' or 'no' question.  
49

50  
51 We obtained data on smoking and alcohol consumption habits using the following  
52  
53 categories, respectively: 'non-smoker', 'ex-smoker', or 'current smoker'; and alcohol  
54  
55 consumption 'once or more per month', 'less than once per month', or 'ex-drinker'.  
56  
57  
58  
59  
60

1  
2  
3  
4  
5  
6 Participants had four options to assess current physical activity level: 'daily', '2-4  
7 times/week', 'weekly', or 'nearly none'.  
8

## 9 10 2. Socioeconomic variables

11  
12 Participants were required to select a description of their living arrangements from  
13 six options: evacuation shelter, temporary housing, rental housing or apartment, a  
14 relative's home, their own home, and other. The last option was considered  
15 non-informative due to its ambiguity and was thus excluded from analysis.  
16  
17

18  
19 Other socioeconomic variables included number of years of education (< 12 years,  
20 ≥12 years), change in employment status, and change in income level. By answering  
21 'Yes' to a change in employment status or income, the participant indicated s/he  
22 became unemployed or experienced decreased income since the disaster.  
23  
24  
25  
26  
27  
28

## 29 30 3. Disaster-related variables

31  
32 Disaster-related variables included experience of the tsunami (yes or no),  
33 experience of the nuclear power plant accident (defined as hearing the explosion; yes or  
34 no), losing someone close as a result of the disaster (yes or no), and damage to  
35 accommodation (none, partial damage, half destroyed, more than half destroyed, total  
36 destruction).  
37  
38  
39  
40  
41  
42  
43  
44

## 45 **Statistical analyses**

46  
47 The incidence of exacerbation of headache, dizziness, palpitations, and shortness of  
48 breath was compared between individuals with different demographic, socioeconomic,  
49 and disaster-related characteristics using chi-square tests. For the analyses of PTSD  
50 incidence, a PCL-S score of 50 was used as a cut-off (19). Individuals with a PCL-S of  
51  
52  
53  
54  
55  
56  
57  
58  
59  
60

1  
2  
3  
4  
5  
6 50 or greater were apportioned to the 'high-scoring group' and compared to the  
7  
8 'low-scoring group' (PCL-S < 50) using chi-square tests.  
9

10 Odds ratios (ORs) and 95% confidence intervals (CIs) for each socioeconomic  
11 characteristic (living arrangement, employment status, income level, and number of  
12 years of education) were calculated using multiple logistic regression models.  
13  
14 Adjustment variables included sex (male, female), age (20–49, 50–64, ≥65 years),  
15 alcohol consumption (once or more per month, ex-drinker, less than once per month),  
16 smoking status (non-smoker, ex-smoker, current smoker), mental health distress (K6<3,  
17 K6≥13), hypertension history (yes or no), stroke history (yes or no), heart disease  
18 history (yes or no), physical activity (≥ daily, 2–4 times per week, weekly, never),  
19 tsunami experience (yes or no), radiation experience (yes or no), damage to  
20 accommodation (none, partial, half, more than half, total), and loss of family member  
21 (yes or no).  
22  
23  
24  
25  
26  
27  
28  
29  
30  
31  
32  
33

34 We conducted the above analyses separately based on sex as well as with both  
35 sexes combined. All analyses were conducted using SAS software version 9.4 (SAS  
36 Institute Inc., Cary, NC, USA).  
37  
38  
39  
40  
41  
42

## 43 **Results**

44 From the sample of 73,433 individuals, 1,893 (2.6%) reported exacerbation of  
45 headaches, 1,229 (1.7%) exacerbation of dizziness, 626 (0.9%) exacerbation of  
46 palpitations, and 434 (0.6%) exacerbation of shortness of breath (Table 1).  
47  
48  
49  
50

## 51 **Demographic characteristics**

52 The demographic characteristics of the population are summarized in Table 1.  
53  
54 Exacerbation of cardiovascular symptoms was significantly higher in women than in  
55  
56  
57  
58  
59  
60

1  
2  
3  
4  
5  
6 men (3.5% versus 1.4% for headaches; 2.2% versus 1.1% for dizziness; 2.0% versus  
7  
8 0.9% for palpitations; and 0.9% versus 0.8% for shortness of breath). Young (20–49  
9  
10 years) individuals were more likely to experience exacerbation of headaches, dizziness,  
11  
12 or palpitations, while the 50–64 years age group more frequently experienced  
13  
14 exacerbation of shortness of breath. Individuals experiencing exacerbation of  
15  
16 cardiovascular symptoms were also more likely to suffer from depression ( $K6 \geq 13$ ) and  
17  
18 Posttraumatic Stress Disorder ( $PCL \geq 50$ ), and commonly had a history of hypertension,  
19  
20 stroke, or heart disease. Neither smoking nor alcohol consumption increased the  
21  
22 occurrence of exacerbated cardiovascular symptoms. Notably, symptom exacerbation  
23  
24 was most pronounced in individuals who were not physically active daily.  
25  
26

### 27 **Socioeconomic variables**

28  
29  
30 Refugees living in their own or a relative's home were less likely to experience  
31  
32 exacerbated cardiovascular symptoms (Table 1). Of the refugees living in their own  
33  
34 home: 1.4% reported exacerbation of headache, 0.9% of dizziness, 1.6% of palpitations,  
35  
36 and 1.0% of shortness of breath. The corresponding statistics for refugees living in  
37  
38 temporary housing and rental houses or apartments were: 2.8%, 1.9%, 1.3%, and 1.2%  
39  
40 and 3.5%, 2.1%, 1.8%, and 1.0%, respectively.  
41  
42

43  
44 In the group that were unemployed due to the disaster: 4.2% of the individuals  
45  
46 reported exacerbation of headache, 2.5% of dizziness, 2.1% of palpitations, and 1.1%  
47  
48 shortness of breath, while the corresponding statistics for the group that did not lose  
49  
50 their jobs after the disaster were: 2.2%, 1.5%, 1.4%, and 0.8%. Exacerbation of most  
51  
52 cardiovascular symptoms was higher in subjects whose income decreased due to the  
53  
54 disaster compared to those who maintained income levels (3.6% versus 2.4% for  
55  
56  
57  
58  
59  
60

1  
2  
3  
4  
5  
6 exacerbation of headache, 2.0% versus 1.6% for exacerbation of dizziness, and 1.7%  
7  
8 versus 1.4% for exacerbation of palpitation).

9  
10 Additionally, exacerbation of most cardiovascular symptoms was higher among  
11  
12 individuals who were educated for 12 years or more compared to those who were less  
13  
14 educated (2.9% versus 1.9% for exacerbation of headache, 1.8% versus 1.4% for  
15  
16 exacerbation of dizziness, and 1.6% versus 1.2% for exacerbation of palpitation).  
17  
18

### 19 20 21 **Disaster-related variables**

22  
23 The group that experienced the tsunami and the nuclear power plant accident were  
24  
25 more likely to experience exacerbated cardiovascular symptoms. Among those who had  
26  
27 experienced the tsunami: 3.2% reported exacerbation of headache, 2.2% of dizziness,  
28  
29 1.7% of palpitations, and 1.7% of shortness of breath, compared to 2.4%, 1.6%, 1.5%,  
30  
31 and 0.8%, respectively, among those with no experience of the tsunami. The  
32  
33 corresponding statistics for individuals that had heard the nuclear power plant accident  
34  
35 were 3.1%, 2.1%, 1.9%, and 1.1% compared to 2.1%, 1.2%, 1.0%, and 0.6% for those  
36  
37 that had not.  
38  
39

### 40 41 **Multiple Logistic Regression analyses**

42  
43 Table 2 summarizes the odds ratios (ORs) and 95% CIs of each socioeconomic  
44  
45 characteristics for exacerbation of headache, dizziness, palpitations, and shortness of  
46  
47 breath. Living arrangement emerged as a risk factor for exacerbated cardiovascular  
48  
49 symptoms from our models, which were adjusted for multiple demographic-, health-,  
50  
51 and disaster-related variables. Compared to participants living in their own home (OR =  
52  
53 1), those living in relatives' homes had greater probability of experiencing exacerbation  
54  
55 of headache (1.58; 95% CI 1.19–2.09) and dizziness (1.42; 95% CI 1.02–1.98).  
56  
57  
58  
59  
60

1  
2  
3  
4  
5  
6 Similarly, those living in rental houses or apartments had greater chance of  
7  
8 experiencing exacerbated headache (1.54; 95% CI 1.32–1.80), dizziness (1.45; 95% CI  
9  
10 1.20–1.75), palpitations (1.25; 95% CI 1.03–1.51), and shortness of breath (1.76; 95%  
11  
12 CI 1.35–2.28). Participants living in evacuation shelters had increased probability of  
13  
14 experiencing exacerbation of headache (1.80; 95% CI 1.09–2.96) and refugees living in  
15  
16 temporary housing similarly had increased likelihood of experiencing exacerbation of  
17  
18 headache (1.42; 95% CI 1.15–1.72), dizziness (1.40; 95% CI 1.09–1.79), and shortness  
19  
20 of breath (1.49; 95% CI 1.07–2.08).  
21

22  
23 Loss of employment also emerged as a risk factor that increased the probability of  
24  
25 cardiovascular symptom exacerbation. Compared to evacuees that remained employed  
26  
27 (OR = 1), those that lost their employment were at higher risk of experiencing  
28  
29 exacerbation of headache (1.28; 95% CI 1.12–1.46), dizziness (1.26; 95% CI 1.07–  
30  
31 1.48), and palpitation (1.21; 95% CI 1.01–1.45). In an unadjusted model, we found a  
32  
33 significant positive association between unemployment and exacerbation of  
34  
35 palpitations; however, after adjusting for multiple relevant variables, this association  
36  
37 was not significant.  
38  
39

40  
41 There was no association between decreased income and exacerbated  
42  
43 cardiovascular symptoms, except for headaches. In this case, adjusting for multiple  
44  
45 variables resulted in an increased odds ratio for exacerbation of headaches both in an  
46  
47 analysis combining the sexes (1.39, 95% CI 1.22–1.60) and in separate analyses of  
48  
49 men and women. Number of years of education was also not associated with  
50  
51 exacerbated cardiovascular symptoms in multiple-adjusted models in the present study.  
52  
53  
54

## 55 Discussion

56  
57  
58  
59  
60



1  
2  
3  
4  
5  
6 We demonstrated that a decrease in socioeconomic status due to the Great East  
7  
8 Japan Earthquake was associated with exacerbated cardiovascular symptoms among  
9  
10 evacuees. Compared with participants living in their own home, people of both genders  
11  
12 living in relatives' homes, evacuation shelters, temporary housing, or rental houses or  
13  
14 apartments were more likely to experience exacerbation of headache, dizziness,  
15  
16 palpitations, or shortness of breath. Similarly, loss of employment and reduced income  
17  
18 due to the disaster increased the risk of experiencing exacerbated symptoms.  
19

20  
21 The following three points should be considered in the context of our results. Firstly,  
22  
23 earthquakes are definitely associated with increased cardiovascular disease, including  
24  
25 sudden cardiac death and acute myocardial infarction (2-14), and our results are  
26  
27 consistent with these earlier findings. The Hanshin-Awaji earthquake was associated  
28  
29 with increased cardiovascular disease that persisted for longer than a month. Further,  
30  
31 an increase in the number of individuals with acute myocardial infarction, especially  
32  
33 women, was particularly evident during the four weeks immediately following the  
34  
35 disaster (9). After the Great East Japan Earthquake, the incidences of reported  
36  
37 cardioembolic stroke increased in the 3–9 months following the disaster (10), as did the  
38  
39 incidence of other cardiovascular diseases (11-14). Our study contributes to the  
40  
41 reported incidences of cardiovascular disease using self-report questionnaires rather  
42  
43 than death certificates and by demonstrating that exacerbated cardiovascular  
44  
45 symptoms occurred among evacuees after the disaster.  
46  
47  
48

49  
50 Secondly, increases in cardiovascular events and exacerbated cardiovascular  
51  
52 symptoms can be attributed to post-disaster distress or mental problems. Studies have  
53  
54 suggested that extremely stressful experiences, such as earthquakes, can trigger  
55  
56 cardiovascular events (20-22). Acute major stress and chronic stress (i.e. the  
57  
58  
59  
60

1  
2  
3  
4  
5  
6 cumulative load of minor daily stress) can have long-term consequences, which can be  
7  
8 perceived as stressful themselves and a potential threat to one's environment, thereby  
9  
10 inducing a variety of negative emotional responses, such as fear, anxiety, sadness,  
11  
12 anger, hostility, and depression (4,23). In turn, these emotional responses may lead to  
13  
14 hypertension or cardiovascular events (20-22). A recent study suggests that PTSD was  
15  
16 frequently noted in cardiovascular disease patients six months after the Great East  
17  
18 Japan Earthquake. The patients with PTSD were more likely to experience a  
19  
20 combination of acute myocardial infarction, stroke, heart disease, and death (24). In the  
21  
22 current study, all individuals exhibiting exacerbated cardiovascular symptoms were  
23  
24 more likely to have depression ( $K6 \geq 13$ ) or Posttraumatic Stress Disorder ( $PCL \geq 50$ ).  
25  
26 Logistic regression analyses also showed that depression and Posttraumatic Stress  
27  
28 Disorder were both independently associated with exacerbated cardiovascular  
29  
30 symptoms (data not shown).  
31  
32  
33

34 Thirdly, although post-disaster increases in cardiovascular events were widely  
35  
36 reported in previous studies, investigation of socioeconomic factors that influenced  
37  
38 these events during the evacuation term of refugees was limited. Previous studies  
39  
40 reported that one year after the Wenchuan Earthquake in China, depression severity  
41  
42 among refugees varied with income, housing status, and social support (25). This  
43  
44 indicated that, through its impact on income, the earthquake was indirectly associated  
45  
46 with life satisfaction and depression (26). Another study showed that six months after  
47  
48 the 2011 Christchurch earthquake in New Zealand, on average lower income per home  
49  
50 contributed unequivocally to earthquake-related distress and dysfunction (27). A recent  
51  
52 study also showed that six months after the Great East Japan Earthquake tsunami  
53  
54  
55  
56  
57  
58  
59  
60

1  
2  
3  
4  
5  
6  
7  
8  
9  
10  
11  
12  
13  
14  
15  
16  
17  
18  
19  
20  
21  
22  
23  
24  
25  
26  
27  
28  
29  
30  
31  
32  
33  
34  
35  
36  
37  
38  
39  
40  
41  
42  
43  
44  
45  
46  
47  
48  
49  
50  
51  
52  
53  
54  
55  
56  
57  
58  
59  
60

experience, property loss, and poverty were associated with PTSD in cardiovascular disease patients and had an adverse prognostic impact (24).

This study revealed that living in evacuation shelters or temporary housing, rather than one's own home, was associated with exacerbation of all the examined cardiovascular symptoms, and the statistical results were more robust in women than in men. Evacuation shelters and temporary housing were less spacious, damper, and less comfortable than refugees' homes.

Due to insufficient access to supermarkets or shortages of cooking equipment and utilities such as gas, evacuees living in shelters may not have access to balanced meals. A recent cross-sectional study showed a well-balanced diet was associated with better living conditions among refugees after the Great East Japan Earthquake, whereas imbalanced diets were not (28, 29). Furthermore, the simple fact of being unable to stay in one's own home and requiring refuge accommodation meant that one's neighborhood had been damaged during the disaster, and this may have led to insufficient social support. All of the above factors can be considered predictors of stress among refugees, and this may affect women more strongly than men.

Unemployment and decreased income due to the disaster were also associated with the exacerbation of some cardiovascular symptoms. These results were predictable as poor economic circumstances are expected to exacerbate depression. Low income may be considered a chronic stressor, increasing psychological distress as a result of limited access to resources and opportunities for accumulation of resources (27).

Previous studies have shown that, following an earthquake, living in a low-income area may contribute to greater psychological distress due to a lack of occupational, social, and financial resources. A community study revealed that, after the Christchurch

1  
2  
3  
4  
5  
6 earthquake, low household income contributed strongly to earthquake-related distress  
7  
8 (27). In the present study, we found a significant association between disaster-related  
9  
10 unemployment and exacerbation of some cardiovascular symptoms. However, the  
11  
12 subsistence allowance given to refugees by the Japanese government may have  
13  
14 reduced this effect by reducing the impact of refugees' lowered economic  
15  
16 circumstances.  
17

18  
19 Educational level was inversely associated with cardiovascular disease risk in  
20  
21 previous studies (30, 31). However, in our study, the number of years that individuals  
22  
23 had been educated was not associated with exacerbated cardiovascular  
24  
25 symptoms. This may be due to post-disaster conditions. In the present study, factors  
26  
27 related to the earthquake, tsunami, and the nuclear accident, and unemployment or  
28  
29 decreased income due to the disasters had a large influence on exacerbated  
30  
31 cardiovascular symptoms. This result may have superseded any potential impact of  
32  
33 education levels.  
34

35  
36 Our understanding of disaster-related stress on cardiovascular disease remains  
37  
38 incomplete. A clinical study from the 1995 Hanshin-Awaji earthquake compared pre-  
39  
40 and post- blood pressure levels in well-controlled hypertension patients and showed an  
41  
42 18mmHg increase in diastolic blood pressure two weeks after the earthquake (32).  
43  
44 Although 'white-coat hypertension' (patients exhibiting increased blood pressure in  
45  
46 clinical settings) partly contributed to the results, some patients developed sustained  
47  
48 hypertension that persisted for one year after the earthquake (32). One study found that  
49  
50 there were increased levels of cholesterol and triglycerides in patients a few weeks after  
51  
52 an earthquake (3), whereas another studies failed to show significantly higher total  
53  
54 cholesterol or HDL-cholesterol during the two weeks following the Hanshin-Awaji  
55  
56  
57  
58  
59  
60

1  
2  
3  
4  
5 earthquake (6). Thus, the extent to which changes in the blood lipid profile contribute to  
6  
7 exacerbated cardiovascular symptoms several months after the Great East Japan  
8  
9 Earthquake remains unknown. Chronic psychological stress is also associated with  
10  
11 increased insulin resistance (4). A recent study after the Great East Japan Earthquake  
12  
13 found that the negative effects of the disaster on metabolic factors were greater among  
14  
15 evacuees than non-evacuees (33), which may also contribute to the occurrence of  
16  
17 exacerbated cardiovascular symptoms among evacuees.  
18  
19

20  
21 Although the results of the present study is limited to residents in the Fukushima  
22  
23 prefecture after the Great East Japan Earthquake, it would provide inspiration for the  
24  
25 future studies among evacuees after disasters. As well, our study suggests early  
26  
27 improvements in the provision of living conditions for the evacuees could be achieved by  
28  
29 several ways: providing speedy restorations of the access to their own homes; providing  
30  
31 more employment opportunity for the evacuees and providing more financial support. For  
32  
33 future disasters, the present study would provide epidemiological basic for governments and  
34  
35 authorities to act as soon as possible for preparation.  
36  
37

38  
39 The large scale of assessment and assessment under post-disaster  
40  
41 conditions provides considerable credibility for the present study. Additionally, our study  
42  
43 is the first to identify an inverse relationship between low socioeconomic status  
44  
45 and exacerbated cardiovascular symptoms from an evacuee self-report questionnaire  
46  
47 after a disaster; thus, our results will be useful for generating guidelines for evacuee  
48  
49 health. However, the following limitations of this study should be considered. Firstly, the  
50  
51 study was based on a subjective self-response survey. However it is reasonable to  
52  
53 expect respondents to understand that the studied symptoms are related to stress  
54  
55 and/or autonomic nervous system disorders. Further information, such as the incidence  
56  
57  
58  
59  
60

1  
2  
3  
4  
5 of cardiovascular disease, should be captured. Although the studied symptoms are not  
6 necessarily logical predictors of cardiovascular diseases, several previous studies have  
7 shown that headaches are suggestive of an incremental risk of stroke (34, 35), and  
8 other studies have also shown that vertigo or dizziness and chest pain are associated  
9 with cardiovascular problems (36, 37). We also conducted an analyses on a subsample  
10 of individuals' self-reported information, which suggested that all of the  
11 discussed symptoms were associated with a diagnosis of hypertension in the last year,  
12 and that exacerbation of dizziness, palpitation, and shortness of breath were associated  
13 with a diagnosis of heart disease in the last year (data not shown). Therefore, our study  
14 of these four symptoms may be helpful for developing plans to improve evacuees'  
15 health to some extent.  
16  
17  
18  
19  
20  
21  
22  
23  
24  
25  
26  
27  
28

29  
30 Secondly, both the Great East Japan Earthquake and also the accompanied nuclear  
31 accident had a large psychological impact on the evacuees. Due to this unusual  
32 situation, the present study cannot be entirely compared with other studies. Thirdly, the  
33 overall response rate to questionnaires was low (40.7%) and sampling skews may have  
34 resulted in biased data.  
35  
36  
37  
38  
39

40 Fourthly, under the unusual social circumstances that follow a major disaster, the  
41 health symptoms perceived by evacuees may be strongly influenced by changes in  
42 family relationships (e.g. death and physical separation) among the evacuees. However,  
43 the present study did not capture these data. Moreover, other socioeconomic factors,  
44 such as household income, and other cardiovascular risk factors, such as blood  
45 pressure and cholesterol levels, were also not captured in the present study.  
46  
47  
48  
49  
50  
51  
52  
53 Additionally, although most questionnaires were collected in the same period (from Jan  
54 2012 to Mar 2012), it is possible that the timing of the survey affected the perceived  
55  
56  
57  
58  
59  
60

1  
2  
3  
4  
5  
6 cardiovascular symptoms. Finally, other environmental factors, such as temperature,  
7  
8 food supplies, and medical facilities may also affect cardiovascular problems (38, 39).

9  
10 These data were also not collected in the present study. The potential associations  
11  
12 observed in this study will be further investigated over an extended period.

13  
14 In conclusion, the present study was the first to identify a relationship between lower  
15  
16 socioeconomic status due to the Great East Japan Earthquake and exacerbated  
17  
18 cardiovascular symptoms among evacuees. Our findings will provide baseline  
19  
20 information for future periodic health examinations and for the development of health  
21  
22 guidelines for evacuees.  
23  
24

### 25 26 27 **Acknowledgements**

28  
29 This Survey was conducted as part of Fukushima Prefecture's post-disaster recovery  
30  
31 plans and was supported by the national 'Health Fund for Children and Adults Affected  
32  
33 by the Nuclear Incident'.  
34  
35

### 36 37 38 **Contributors**

39  
40 WZ and TO designed the study. TO, SY, MM, MH. NH, YS, HY, MH, HT, and AO were  
41  
42 responsible for data collection and supervising the study. The analyses were conducted  
43  
44 by WZ and TO. The manuscript was written by WZ. All the authors assisted with revision  
45  
46 of the manuscript, and read and approved the final version of the manuscript.  
47  
48  
49  
50  
51  
52  
53  
54

### 55 56 **Funding**

1  
2  
3  
4  
5  
6 This survey was conducted as part of Fukushima Prefecture's post-disaster recovery  
7  
8 plans and was supported by the national 'Health Fund for Children and Adults Affected  
9  
10 by the Nuclear Incident'.  
11

#### 12 13 14 **Declaration of interests**

15  
16 We declare that we have no competing interests.  
17  
18  
19

#### 20 21 22 23 **Patient consent**

24  
25 Obtained.  
26  
27

#### 28 29 30 **Data sharing statement**

31  
32 No additional data are available.  
33  
34  
35  
36  
37  
38  
39  
40  
41  
42  
43  
44  
45  
46  
47  
48  
49  
50  
51  
52  
53  
54

#### 55 56 **References** 57 58 59 60



- 1  
2  
3  
4  
5  
6  
7  
8  
9  
10  
11  
12  
13  
14  
15  
16  
17  
18  
19  
20  
21  
22  
23  
24  
25  
26  
27  
28  
29  
30  
31  
32  
33  
34  
35  
36  
37  
38  
39  
40  
41  
42  
43  
44  
45  
46  
47  
48  
49  
50  
51  
52  
53  
54  
55  
56  
57  
58  
59  
60  
1. Yasumura S, Hosoya M, Yamashita S, Kamiya K, Abe M, Akashi M, Kodama K, Ozasa K; Fukushima Health Management Survey Group. Study protocol for the Fukushima Health Management Survey. *J Epidemiol.* 2012; 22: 375-383.
2. Nozaki E, Nakamura A, Abe A, Kagaya Y, Kohzu K, Sato K, Nakajima S, Fukui S, Endo H, Takahashi T, Seki H, Tamaki K, Mochizuki I. Occurrence of cardiovascular events after 2011 Great East Japan Earthquake and tsunami disaster. *Int Heart J.* 2013; 54: 247-253.
3. Trevisan M, Celentano E, Meucci C, Farinaro E, Jossa F, Krogh V, Giumetti D, Panico S, Scottoni A, Mancini M. Short-term effect of natural disasters on coronary heart disease risk factors. *Arteriosclerosis.* 1986; 6: 491-494.
4. Kario K, McEwen BS, Pickering TG. Disasters and the heart: a review of the effects of earthquake-induced stress on cardiovascular disease. *Hypertens Res.* 2003; 26:355-367.
5. Kario K, Matsuo T, Kayaba K, Soukejima S, Kagamimori S, Shimada K. Earthquake-induced cardiovascular disease and related risk factors in focusing on the Great Hanshin-Awaji Earthquake. *J Epidemiol.* 1998; 8:131-139.
6. Kario K, Matsuo T. Increased incidence of cardiovascular attacks in the epicenter just after the Hanshin-Awaji earthquake. *Thromb Haemost.* 1995; 74: 1207.
7. Kario K, Matsuo T, Kobayashi H, Yamamoto K, Shimada K. Earthquake-induced potentiation of acute risk factors in hypertensive elderly patients: possible triggering of cardiovascular events after a major earthquake. *J Am Coll Cardiol.* 1997; 29: 926-933.

- 1  
2  
3  
4  
5  
6 8. Kario K, Matsuo T, Shimada K, Pickering TG. Factors associated with the occurrence  
7  
8 and magnitude of earthquake-induced increases in blood pressure. *Am J Med.*  
9  
10 2001; 111: 379-384.  
11
- 12 9. Suzuki S, Sakamoto S, Miki T, Matsuo T. Hanshin-Awaji earthquake and acute  
13  
14 myocardial infarction [letter]. *Lancet.* 1995; 345: 981.  
15  
16
- 17 10. Itabashi R, Furui E, Sato S, Yazawa Y, Kawata K, Mori E. Incidence of cardioembolic  
18  
19 stroke including paradoxical brain embolism in patients with acute ischemic stroke  
20  
21 before and after the Great East Japan Earthquake. *Cerebrovasc Dis.* 2014;  
22  
23 37:431-437.  
24  
25
- 26 11 Suzuki H, Ohira T, Takeishi Y, Hosoya M, Yasumura S, Satoh H, Kawasaki  
27  
28 Y4, Takahashi A, Sakai A, Ohtsuru A, Kobashi G, Ozasa K, Yamashita S, Kamiya K,  
29  
30 Abe M; Fukushima Health Management Survey Group. Increased prevalence of  
31  
32 atrial fibrillation after the Great East Japan Earthquake: Results from the Fukushima  
33  
34 Health Management Survey. *Int J Cardiol.* 2015; 198: 102-105.  
35  
36
- 37 12. Aoki T, Takahashi J, Fukumoto Y, Yasuda S, Ito K, Miyata S, Shinozaki T, Inoue K, Yagi  
38  
39 T, Komaru T, Katahira Y, Obata A, Hiramoto T, Sukegawa H, Ogata K, Shimokawa H.  
40  
41 Effect of the Great East Japan earthquake on Cardiovascular Diseases. *Circ J.*  
42  
43 2013; 77: 490-493.  
44  
45
- 46 13. Aoki T, Fukumoto Y, Yasuda S, Sakata Y, Ito K, Takahashi J, Miyata S, Tsuji I,  
47  
48 Shimokawa H. The Great East Japan Earthquake Disaster and cardiovascular  
49  
50 diseases. *Eur Heart J.* 2012; 33:2796-2803.  
51  
52
- 53 14. Yamauchi H, Yoshihisa A, Iwaya S, Owada T, Sato T, Suzuki S, Yamaki T, Sugimoto  
54  
55 K, Kunii H, Nakazato K, Suzuki H, Saitoh S, Takeishi Y. Clinical Features of Patients  
56  
57  
58  
59  
60

- 1  
2  
3  
4  
5  
6 With Decompensated Heart Failure After the Great East Japan Earthquake. *Am J*  
7 *Cardiol.* 2013; 112: 94-99.  
8  
9
- 10 15. Yabe H, Suzuki Y, Mashiko H, Nakayama Y, Hisata M, Niwa S, Yasumura S,  
11 Yamashita S, Kamiya K, Abe M. Psychological distress after the great East Japan  
12 earthquake and fukushima daiichi nuclear power plant accident: results of a mental  
13 health and lifestyle survey through the fukushima health management survey in  
14 fy2011 and fy2012. *Fukushima J Med Sci.* 2014; 60:57-67.  
15  
16
- 17 16. Blanchard EB, Jones-Alexander J, Buckley TC, Forneris CA. Psychometric  
18 properties of the PTSD Checklist (PCL). *Behav Res Ther.* 1996; 34: 669-673.  
19  
20
- 21 17. Furukawa TA, Kessler RC, Slade T, Andrews G. The performance of the K6 and  
22 K10 screening scales for psychological distress in the Australian National Survey of  
23 Mental Health and Well-Being. *Psychol Med.* 2003; 33:357-362.  
24  
25
- 26 18. Sakurai K, Nishi A, Kondo K, Yanagida K, Kawakami N. Screening performance of  
27 K6/K10 and other screening instruments for mood and anxiety disorders in Japan.  
28 *Psychiatry Clin Neurosci.* 2011; 65:434-441.  
29  
30
- 31 19. Weathers FW, Litz BT, Herman DS, Huska JA, Keane TM. The PTSD checklist  
32 (OCL): Reliability, Validity, and Diagnostic Utility. Paper presented at the Annual  
33 Meeting of the International Society for Traumatic Stress Studies, San Antonio, TX.  
34 1993.  
35  
36
- 37 20 Pickering TG. Mental stress as a causal factor in the development of hypertension  
38 and cardiovascular disease. *Curr Hypertens Rep.* 2001; 3: 249-254.  
39  
40
- 41 21. Kabutoya T, Kario K. Earthquake and blood pressure. *Hypertens Res.* 2009;  
42 32:732-734.  
43  
44  
45  
46  
47  
48  
49  
50  
51  
52  
53  
54  
55  
56  
57  
58  
59  
60

- 1  
2  
3  
4  
5  
6 22. Kario K. Disaster hypertension- its characteristics, mechanism, and management.  
7  
8 Circ J. 2012; 76: 553-552.  
9
- 10 23. Yokoyama Y, Otsuka K, Kawakami N, Kobayashi S, Ogawa A, Tanno K, Onoda T,  
11  
12 Yaegashi Y, Sakata K. Mental health and related factors after the Great East Japan  
13  
14 earthquake and tsunami. PLoS One. 2014; 9: e102497.  
15  
16
- 17 24. Onose T, Nochioka K, Sakata Y, Miura M, Tadaki S, Ushigome R, Yamauchi T, Sato  
18  
19 K, Tsuji K, Abe R, Miyata S, Takahashi J, Shimokawa H; CHART-2 Investigators.  
20  
21 Predictors and prognostic impact of post-traumatic stress disorder after the great  
22  
23 East Japan earthquake in patients with cardiovascular disease. Circ J. 2015; 79:  
24  
25 664-667.  
26  
27
- 28 25. Xu J, Mo L, Xu Z. A cross-sectional study on risk factors of depression severity  
29  
30 among survivors of the 2008 Sichuan earthquake. Community Ment Health J. 2013;  
31  
32 49: 847-856.  
33  
34
- 35 26. Huang Y, Wong H, Tan HT. Associations between economic loss, financial strain  
36  
37 and the psychological status of Wenchuan earthquake survivors. Disasters. 2015;  
38  
39 39:795-810.  
40  
41
- 42 27. Dorahy MJ, Rowlands A, Renouf C, Hanna D, Britt E, Carter JD. Impact of average  
43  
44 household income and damage exposure on post-earthquake distress and  
45  
46 functioning: A community study following the February 2011 Christchurch  
47  
48 earthquake. Br J Psychol. 2015; 106: 526-543.  
49  
50
- 51 28. Nishi N, Yoshimura E, Ishikawa-Takata K, Tsuboyama-Kasaoka N, Kubota T,  
52  
53 Miyachi M, Tokudome S, Yokoyama Y, Sakata K, Kobayashi S, Ogawa A.  
54  
55  
56  
57  
58  
59  
60

- 1  
2  
3  
4  
5  
6 Relationship of living conditions with dietary patterns among survivors of the great  
7  
8 East Japan earthquake. *J Epidemiol.* 2013; 5: 376-381.  
9
- 10 29. Zhang W, Ohira T, Abe M, Kamiya K, Yamashita S, Yasumura S, Ohtsuru A,  
11  
12 Masaharu M, Harigane M, Horikoshi N, Suzuki Y, Yabe H, Yuuki M, Nagai M,  
13  
14 Takahashi H, Nakano H; Fukushima Health Management Survey Group.  
15  
16 Evacuation after the Great East Japan Earthquake was associated with poor dietary  
17  
18 intake: The Fukushima Health Management Survey. *J Epidemiol.* 2017; 27: 14-23.  
19
- 20  
21 30. Shea S, Lima J, Diez-Roux A, Jorgensen NW, McClelland RL Socioeconomic  
22  
23 Status and Poor Health Outcome at 10 Years of Follow-Up in the Multi-Ethnic Study  
24  
25 of Atherosclerosis. *PLoS One.* 2016; 11  
26  
27
- 28 31. Veronesi G, Tunstall-Pedoe H, Ferrario MM, Kee F, Kuulasmaa K, Chambless  
29  
30 LE, Amouyel P, Arveiler D, Bobak M, Ferrieres J, Giampaoli S, Jørgensen T, Peters  
31  
32 A, Salomaa V, Soderberg S, Tamosiunas A, Cesana G; MORGAM Project.  
33  
34 Combined effect of educational status and cardiovascular risk factors on the  
35  
36 incidence of coronary heart disease and stroke in European cohorts: Implications for  
37  
38 prevention. *Eur J Prev Cardiol.* 2016 Nov 11. pii: 2047487316679521. [Epub ahead  
39  
40 of print]  
41  
42
- 43  
44 32. Kario K, Matsuo T, Ishida T, Shimada K. 'White coat' hypertension and the  
45  
46 Hanshin-Awaji Earthquake. *Lancet.* 1995; 345: 1346.  
47  
48
- 49 33. Satoh H, Ohira T, Hosoya M, Sakai A, Watanabe T, Ohtsuru A et al. Evacuation  
50  
51 after the Fukushima Daiichi Nuclear Power Plant Accident Is a Cause of Diabetes:  
52  
53 Results from the Fukushima Health Management Survey. *J Diabetes Res.* 2015.  
54  
55  
56  
57  
58  
59  
60

- 1  
2  
3  
4  
5  
6 34. Tsai CL, Chou CH, Lee PJ, Yin JH, Chen SY, Lin CC, Sung YF, Yang FC, Chung  
7 CH, Chien WC, Tsai CK, Lee JT. The potential impact of primary headache  
8 disorders on stroke risk. *J Headache Pain*. 2016; 17: 108.  
9  
10  
11  
12 35. Hu X, Zhou Y, Zhao H, Peng C. Migraine and the risk of stroke: an updated  
13 meta-analysis of prospective cohort studies. *Neurol Sci*. 2016 Oct 26. [Epub ahead  
14 of print]  
15  
16  
17  
18 36. Doijiri R, Uno H, Miyashita K, Ihara M, Nagatsuka K. How Commonly Is Stroke  
19 Found in Patients with Isolated Vertigo or Dizziness Attack? *J Stroke Cerebrovasc*  
20 *Dis*. 2016; 25: 2549-2552.  
21  
22  
23  
24  
25 37. Haasenritter J, Stanze D, Widera G, Wilimzig C, Abu Hani M, Sonnichsen AC, Bosner  
26 S, Rochon J, Donner-Banzhoff N. Does the patient with chest pain have a coronary  
27 heart disease? Diagnostic value of single symptoms and signs--a meta-analysis.  
28 *Croat Med J*. 2012; 53:432-441.  
29  
30  
31  
32  
33 38. Sun Z. Cardiovascular responses to cold exposure. *Front Biosci (Elite Ed)*. 2010; 2:  
34 495-503.  
35  
36  
37  
38 39. Nakamura M, Tanaka F, Nakajima S, Honma M, Sakai T, Kawakami M, Endo H,  
39 Onodera M, Niiyama M, Komatsu T, Sakamaki K, Onoda T, Sakata K, Morino Y,  
40 Takahashi T, Makita S. Comparison of the incidence of acute decompensated heart  
41 failure before and after the major tsunami in Northeast Japan. *Am J Cardiol*. 2012;  
42 110:1856-1860.  
43  
44  
45  
46  
47  
48  
49  
50  
51  
52  
53  
54  
55  
56  
57  
58  
59  
60

1  
2  
3  
4  
5  
6  
7  
8  
9  
10  
11  
12  
13  
14  
15  
16  
17  
18  
19  
20  
21  
22  
23  
24  
25  
26  
27  
28  
29  
30  
31  
32  
33  
34  
35  
36  
37  
38  
39  
40  
41  
42  
43  
44  
45  
46  
47  
48  
49

1 Table 1. Characteristics of survey participants and correlated incidence of exacerbation of cardiovascular related symptoms.  
2  
3

|                                       | Exacerbation of<br>headache | Exacerbation of<br>dizziness | Exacerbation of<br>palpitation | Exacerbation of<br>shortness of breath |
|---------------------------------------|-----------------------------|------------------------------|--------------------------------|----------------------------------------|
|                                       | No. (%)                     | No. (%)                      | No. (%)                        | No. (%)                                |
| <b>Sex</b>                            |                             |                              |                                |                                        |
| Men                                   | 466 (1.4)                   | 341 (1.1)                    | 277 (0.9)                      | 257 (0.8)                              |
| Women                                 | 1,427 (3.5)                 | 888 (2.2)                    | 808 (2.0)                      | 369 (0.9)                              |
| <b>Age</b>                            |                             |                              |                                |                                        |
| 20-49                                 | 966 (3.9)                   | 507 (2.0)                    | 407 (1.6)                      | 147 (0.6)                              |
| 50-64                                 | 514 (2.4)                   | 302 (1.4)                    | 323 (1.5)                      | 159 (0.8)                              |
| ≥65                                   | 413 (1.4)                   | 420 (1.6)                    | 355 (1.3)                      | 320 (0.4)                              |
| <b>Mental health Status</b>           |                             |                              |                                |                                        |
| K6<13                                 | 1,092 (1.7)                 | 695 (1.1)                    | 562 (0.9)                      | 355 (0.6)                              |
| K6≥13                                 | 801 (8.9)                   | 534 (5.3)                    | 523 (5.2)                      | 271 (2.7)                              |
| <b>Post traumatic stress disorder</b> |                             |                              |                                |                                        |
| No                                    | 1,062 (1.7)                 | 653 (1.0)                    | 542 (0.9)                      | 323 (0.5)                              |
| Yes                                   | 831 (8.0)                   | 576 (5.5)                    | 543 (5.2)                      | 303 (2.9)                              |
| <b>Smoking status</b>                 |                             |                              |                                |                                        |
| Non-smoker                            | 1,104 (2.7)                 | 715 (1.8)                    | 653 (1.6)                      | 318 (0.8)                              |
| Ex-smoker                             | 338 (2.1)                   | 226 (1.4)                    | 214 (1.4)                      | 171 (1.1)                              |
| Current smoker                        | 403 (2.8)                   | 258 (1.8)                    | 196 (1.3)                      | 123 (0.8)                              |

**Alcohol consumption**

|                        |             |           |           |           |
|------------------------|-------------|-----------|-----------|-----------|
| Less than once a month | 1,067 (2.9) | 674 (1.8) | 597 (1.6) | 323 (0.9) |
| Ex-drinker             | 80 (2.9)    | 63 (2.3)  | 61 (2.2)  | 41 (1.5)  |
| One or more per month  | 715 (2.3)   | 463 (1.5) | 407 (1.3) | 248 (0.8) |

**Physical activity**

|                    |            |           |           |           |
|--------------------|------------|-----------|-----------|-----------|
| ≥ daily            | 179 (1.7)  | 131 (1.2) | 96 (0.9)  | 69 (0.7)  |
| 2–4 times per week | 309 (2.2)  | 245 (1.7) | 195 (1.4) | 123 (0.9) |
| Weekly             | 234 (2.4)  | 143 (1.4) | 139 (1.4) | 97 (1.0)  |
| Never              | 1144 (3.2) | 687 (1.9) | 637 (1.8) | 325 (0.9) |

**Hypertension history**

|     |             |           |           |           |
|-----|-------------|-----------|-----------|-----------|
| No  | 1,216 (2.8) | 667 (1.6) | 584 (1.4) | 276 (0.6) |
| Yes | 677 (2.2)   | 562 (1.8) | 501 (1.6) | 350 (1.1) |

**Stroke history**

|     |             |             |             |           |
|-----|-------------|-------------|-------------|-----------|
| No  | 1,799 (2.6) | 1,146 (1.7) | 1,799 (1.5) | 576 (0.8) |
| Yes | 94 (2.4)    | 83 (2.2)    | 94 (1.6)    | 50 (1.3)  |

**Heart disease history**

|     |             |             |             |           |
|-----|-------------|-------------|-------------|-----------|
| No  | 1,691 (2.6) | 1,025 (1.6) | 1,691 (2.6) | 432 (0.7) |
| Yes | 202 (10.7)  | 204 (2.8)   | 202 (4.0)   | 194 (2.7) |

**Unemployment**

|     |             |           |           |           |
|-----|-------------|-----------|-----------|-----------|
| No  | 1,293 (2.2) | 874 (1.5) | 790 (1.4) | 470 (0.8) |
| Yes | 600 (4.2)   | 355 (2.5) | 295 (2.1) | 156 (1.1) |

**Income decrease**

|    |             |           |           |           |
|----|-------------|-----------|-----------|-----------|
| No | 1,432 (2.4) | 968 (1.6) | 870 (1.4) | 506 (0.8) |
|----|-------------|-----------|-----------|-----------|



|                                     |             |           |           |           |
|-------------------------------------|-------------|-----------|-----------|-----------|
| Yes                                 | 461 (3.6)   | 261 (2.0) | 215 (1.7) | 120 (0.9) |
| <b>Living arrangement</b>           |             |           |           |           |
| Evacuation shelter                  | 213 (2.5)   | 12 (1.6)  | 5 (0.7)   | 5 (0.7)   |
| Temporary housing                   | 195 (2.8)   | 134 (1.9) | 89 (1.3)  | 81 (1.2)  |
| Rental house or apartment           | 796 (3.5)   | 489 (2.1) | 421 (1.8) | 224 (1.0) |
| Relatives' home                     | 78 (2.8)    | 53 (1.9)  | 209 (1.0) | 108 (0.5) |
| Own home                            | 292 (1.4)   | 199 (0.9) | 45 (1.6)  | 29 (1.0)  |
| <b>Tsunami experience</b>           |             |           |           |           |
| No                                  | 1,424 (2.4) | 908 (1.6) | 830 (1.4) | 458 (0.8) |
| Yes                                 | 469 (3.2)   | 321 (2.2) | 255 (1.7) | 168 (1.1) |
| <b>Radiation experience</b>         |             |           |           |           |
| No                                  | 717 (2.1)   | 426 (1.2) | 358 (1.0) | 201 (0.6) |
| Yes                                 | 1,176 (3.1) | 803 (2.1) | 727 (1.9) | 425 (1.1) |
| <b>Damage to house</b>              |             |           |           |           |
| None                                | 413 (2.2)   | 258 (1.4) | 233 (1.3) | 103 (0.6) |
| Partial                             | 911 (2.4)   | 600 (1.6) | 559 (1.5) | 347 (0.9) |
| Half                                | 184 (3.5)   | 129 (2.5) | 83 (1.6)  | 55 (1.1)  |
| More than half                      | 67 (3.4)    | 48 (2.5)  | 38 (1.9)  | 23 (1.2)  |
| Total                               | 126 (3.3)   | 86 (2.2)  | 66 (1.7)  | 43 (1.1)  |
| <b>Loss of family member</b>        |             |           |           |           |
| No                                  | 552 (3.9)   | 363 (2.6) | 296 (2.1) | 199 (1.4) |
| Yes                                 | 1,291 (2.3) | 825 (1.5) | 759 (1.3) | 404 (0.7) |
| <b>Number of years of education</b> |             |           |           |           |

1  
2  
3  
4  
5  
6  
7  
8  
9  
10  
11  
12  
13  
14  
15  
16  
17  
18  
19  
20  
21  
22  
23  
24  
25  
26  
27  
28  
29  
30  
31  
32  
33  
34  
35  
36  
37  
38  
39  
40  
41  
42  
43  
44  
45  
46  
47  
48  
49

|   |                       |             |           |           |           |
|---|-----------------------|-------------|-----------|-----------|-----------|
| 4 | <12 years (reference) | 352 (1.9)   | 265 (1.4) | 223 (1.2) | 202 (1.1) |
| 5 | ≥12 years             | 1,471 (2.9) | 916 (1.8) | 822 (1.6) | 397 (0.8) |

For peer review only

Table 2. Odds ratios (OR) and 95% confidence intervals (CIs) for cardiovascular related symptoms obtained from multiple logistic regression analyses

|                                     |                                 | Exacerbation of Headache |                        |                                |                                               |
|-------------------------------------|---------------------------------|--------------------------|------------------------|--------------------------------|-----------------------------------------------|
|                                     |                                 | OR(95%CI) <sup>a</sup>   | OR(95%CI) <sup>b</sup> | OR(95%CI) for men <sup>b</sup> | OR(95%CI) <sup>f</sup> for women <sup>b</sup> |
| <b>living arrangement</b>           | <b>Own home (reference)</b>     | 1.00(reference)          | 1.00(reference)        | 1.00(reference)                | 1.00(reference)                               |
|                                     | Relatives' home                 | 2.03 (1.58-2.62)         | 1.58 (1.19-2.09)       | 1.95 (1.11-2.57)               | 1.46 (1.06-2.02)                              |
|                                     | Rental house or apartment       | 2.21 (1.93-2.54)         | 1.54 (1.32-1.80)       | 1.83 (1.34-2.53)               | 1.46 (1.22-1.75)                              |
|                                     | Evacuation shelter              | 2.01 (1.24-3.25)         | 1.80 (1.09-2.96)       | 2.24 (0.99-5.16)               | 1.61 (0.85-3.03)                              |
|                                     | Temporary housing               | 2.13 (1.77-2.56)         | 1.42 (1.15-1.72)       | 1.69 (1.11-3.43)               | 1.36 (1.06-1.73)                              |
| <b>Unemployment</b>                 | <b>No (reference)</b>           | 1.00(reference)          | 1.00(reference)        | 1.00(reference)                | 1.00(reference)                               |
|                                     | Yes                             | 1.70 (1.53-1.88)         | 1.28 (1.12-1.46)       | 1.36 (1.04-1.78)               | 1.26 (1.09-1.47)                              |
| <b>Income decrease</b>              | <b>No (reference)</b>           | 1.00(reference)          | 1.00(reference)        | 1.00(reference)                | 1.00(reference)                               |
|                                     | Yes                             | 1.56 (1.40-1.74)         | 1.39 (1.22-1.60)       | 1.39 (1.08-1.78)               | 1.39 (1.17-1.63)                              |
| <b>Number of years of education</b> | <b>&lt;12 years (reference)</b> | 1.00(reference)          | 1.00(reference)        | 1.00(reference)                | 1.00(reference)                               |
|                                     | ≥12 years                       | 1.02 (0.89-1.16)         | 1.04 (0.81-1.63)       | 1.25 (0.91-1.73)               | 0.97 (0.80-1.17)                              |

1  
2  
3  
4  
5  
6  
7  
8  
9  
10  
11  
12  
13  
14  
15  
16  
17  
18  
19  
20  
21  
22  
23  
24  
25  
26  
27  
28  
29  
30  
31  
32  
33  
34  
35  
36  
37  
38  
39  
40  
41  
42  
43  
44  
45  
46  
47  
48  
49

|                                     |                                 | Exacerbation of Dizziness |                        |                                |                                              |
|-------------------------------------|---------------------------------|---------------------------|------------------------|--------------------------------|----------------------------------------------|
|                                     |                                 | OR(95%CI) <sup>a</sup>    | OR(95%CI) <sup>b</sup> | OR(95%CI) for men <sup>b</sup> | OR(95%CI) <sup>f</sup> or women <sup>b</sup> |
| <b>living arrangement</b>           | <b>Own home (reference)</b>     | 1.00(reference)           | 1.00(reference)        | 1.00(reference)                | 1.00(reference)                              |
|                                     | Relatives' home                 | 1.98 (1.46-2.69)          | 1.42 (1.02-1.98)       | 0.96 (0.49-1.91)               | 1.66 (1.13-2.43)                             |
|                                     | Rental house or apartment       | 2.27 (1.91-2.69)          | 1.45 (1.20-1.75)       | 1.28 (0.92-1.79)               | 1.55 (1.23-1.96)                             |
|                                     | Evacuation shelter              | 1.84 (1.02-3.32)          | 1.39 (0.74-2.59)       | 0.85 (0.26-2.77)               | 1.83 (0.87-3.84)                             |
|                                     | Temporary housing               | 2.09 (1.68-2.61)          | 1.40 (1.09-1.79)       | 1.51 (1.00-2.28)               | 1.36 (1.00-1.85)                             |
| <b>Unemployment</b>                 | <b>No (reference)</b>           | 1.00(reference)           | 1.00(reference)        | 1.00(reference)                | 1.00(reference)                              |
|                                     | Yes                             | 1.65 (1.45-1.87)          | 1.26 (1.07-1.48)       | 1.27 (0.94-1.73)               | 1.20 (0.98-1.45)                             |
| <b>Income decrease</b>              | <b>No (reference)</b>           | 1.00(reference)           | 1.00(reference)        | 1.00(reference)                | 1.00(reference)                              |
|                                     | Yes                             | 1.37 (1.19-1.57)          | 1.18 (0.99-1.40)       | 1.12 (0.83-1.51)               | 1.22 (0.98-1.51)                             |
| <b>Number of years of education</b> | <b>&lt;12 years (reference)</b> | 1.00(reference)           | 1.00(reference)        | 1.00(reference)                | 1.00(reference)                              |
|                                     | ≥12 years                       | 1.17 (1.01-1.37)          | 1.13 (0.94-1.36)       | 1.08 (0.80-1.47)               | 1.14 (0.90-1.44)                             |

|                                     |                                 | Exacerbation of Palpitation |                        |                                |                                  |
|-------------------------------------|---------------------------------|-----------------------------|------------------------|--------------------------------|----------------------------------|
|                                     |                                 | OR(95%CI) <sup>a</sup>      | OR(95%CI) <sup>b</sup> | OR(95%CI) for men <sup>b</sup> | OR(95%CI) for women <sup>b</sup> |
| <b>living arrangement</b>           | <b>Own home (Reference)</b>     | 1.00(reference)             | 1.00(reference)        | 1.00(reference)                | 1.00(reference)                  |
|                                     | Relatives' home                 | 1.70 (1.23-2.34)            | 1.23 (0.87-1.74)       | 1.25 (0.57-2.71)               | 1.21 (0.82-1.78)                 |
|                                     | Rental house or apartment       | 1.90 (1.60-2.25)            | 1.25 (1.03-1.51)       | 1.73 (1.17-2.53)               | 1.11 (0.89-1.39)                 |
|                                     | Evacuation shelter              | 0.74 (0.30-1.80)            | 0.51 (0.19-1.39)       | 0.93 (0.22-3.92)               | 0.35 (0.09-1.45)                 |
|                                     | Temporary housing               | 1.32 (1.03-1.69)            | 0.82 (0.62-1.10)       | 1.19 (0.69-2.04)               | 0.72 (0.51-1.01)                 |
| <b>Unemployment</b>                 | <b>No (reference)</b>           | 1.00(reference)             | 1.00(reference)        | 1.00(reference)                | 1.00(reference)                  |
|                                     | Yes                             | 1.46 (1.27-1.68)            | 1.21 (1.01-1.45)       | 1.29 (0.91-1.83)               | 1.20 (0.97-1.48)                 |
| <b>Income decrease</b>              | <b>No (reference)</b>           | 1.00(reference)             | 1.00(reference)        | 1.00(reference)                | 1.00(reference)                  |
|                                     | Yes                             | 1.24 (1.07-1.44)            | 1.14 (0.94-1.38)       | 1.46 (1.05-2.03)               | 1.00 (0.80-1.28)                 |
| <b>Number of years of education</b> | <b>&lt;12 years (reference)</b> | 1.00(reference)             | 1.00(reference)        | 1.00(reference)                | 1.00(reference)                  |
|                                     | ≥12 years                       | 1.28 (1.09-1.50)            | 1.14 (0.93-1.39)       | 1.15 (0.79-1.67)               | 1.00 (0.81-1.23)                 |

1  
2  
3  
4  
5  
6  
7  
8  
9  
10  
11  
12  
13  
14  
15  
16  
17  
18  
19  
20  
21  
22  
23  
24  
25  
26  
27  
28  
29  
30  
31  
32  
33  
34  
35  
36  
37  
38  
39  
40  
41  
42  
43  
44  
45  
46  
47  
48  
49

|                                     |                                 | Exacerbation of Shortness of Breath |                        |                                |                                  |
|-------------------------------------|---------------------------------|-------------------------------------|------------------------|--------------------------------|----------------------------------|
|                                     |                                 | OR(95%CI) <sup>a</sup>              | OR(95%CI) <sup>b</sup> | OR(95%CI) for men <sup>b</sup> | OR(95%CI) for women <sup>b</sup> |
| <b>living arrangement</b>           | <b>Own home (Reference)</b>     | 1.00(reference)                     | 1.00(reference)        | 1.00(reference)                | 1.00(reference)                  |
|                                     | Relatives' home                 | 1.60 (1.02-2.52)                    | 1.16 (0.71-1.90)       | 0.95 (0.42-2.16)               | 1.33 (0.72-2.63)                 |
|                                     | Rental house or apartment       | 2.34 (1.85-2.96)                    | 1.76 (1.35-2.28)       | 1.50 (1.01-2.22)               | 1.98 (1.39-2.81)                 |
|                                     | Evacuation shelter              | 1.33 (0.54-3.27)                    | 1.20 (0.48-3.00)       | 1.73 (0.60-4.95)               | 0.52 (0.07-3.79)                 |
|                                     | Temporary housing               | 2.29 (1.72-3.06)                    | 1.49 (1.07-2.08)       | 1.25 (0.75-2.09)               | 1.72 (1.10-2.68)                 |
| <b>Unemployment</b>                 | <b>No (reference)</b>           | 1.00(reference)                     | 1.00(reference)        | 1.00(reference)                | 1.00(reference)                  |
|                                     | Yes                             | 1.55 (1.29-1.87)                    | 1.13 (0.89-1.44)       | 1.06 (0.73-1.55)               | 1.17 (0.85-1.60)                 |
| <b>Income decrease</b>              | <b>No (reference)</b>           | 1.00(reference)                     | 1.00(reference)        | 1.00(reference)                | 1.00(reference)                  |
|                                     | Yes                             | 1.24 (1.01-1.52)                    | 1.14 (0.89-1.47)       | 1.18 (0.83-1.69)               | 1.10 (0.77-1.57)                 |
| <b>Number of years of education</b> | <b>&lt;12 years (reference)</b> | 1.00(reference)                     | 1.00(reference)        | 1.00(reference)                | 1.00(reference)                  |
|                                     | ≥12 years                       | 0.94 (0.78-1.13)                    | 0.84 (0.67-1.06)       | 0.76 (0.54-1.07)               | 0.90 (0.66-1.23)                 |

- a. Adjusted for age and sex.
- b. Further adjusted for drinking status (once or more per month, ex-drinker, less than once per month), smoking status (non-smoker, ex-smoker, current smoker), mental health distress (K6<3, K6≥13), hypertension history (yes or no), stroke history (yes or no), heart disease history (yes or no), physical activities (≥ daily, 2–4 times per week, weekly, never), tsunami experience (yes or no), radiation experience (yes or no), damage to house (none, partial, half, more than half, total), loss of family member (yes or no).
